# Supplementary material
Source: PubMed Central journal article supplement (PMC6399043)
Supplement: NIHMS1009046-supplement-Suppl.pdf [file NIHMS1009046-supplement-Suppl.pdf]

# Supplementary Material for "A Bayesian Design for Phase I Cancer Therapeutic Vaccine Trials"

## Contents

|          |                                                              |           |
|----------|--------------------------------------------------------------|-----------|
| <b>1</b> | <b>Simulation scenarios</b>                                  | <b>2</b>  |
| <b>2</b> | <b>Simulation results</b>                                    | <b>3</b>  |
| <b>3</b> | <b>Simulation results for robustness analysis</b>            | <b>8</b>  |
| 3.1      | 10+10 . . . . .                                              | 8         |
| 3.2      | $r = 1$ . . . . .                                            | 13        |
| 3.3      | $\tau$ misspecified . . . . .                                | 18        |
| 3.4      | $\mathcal{C}_1 = 0.75$ . . . . .                             | 23        |
| 3.5      | $\mathcal{C}_2 = 0.75$ . . . . .                             | 28        |
| 3.6      | $\mathcal{C}_3 = 0.55$ . . . . .                             | 33        |
| <b>4</b> | <b>Simulation settings for comparing to existing methods</b> | <b>38</b> |
| 4.1      | EffTox Design . . . . .                                      | 38        |
| 4.2      | UAROET Design . . . . .                                      | 38        |

# 1 Simulation scenarios

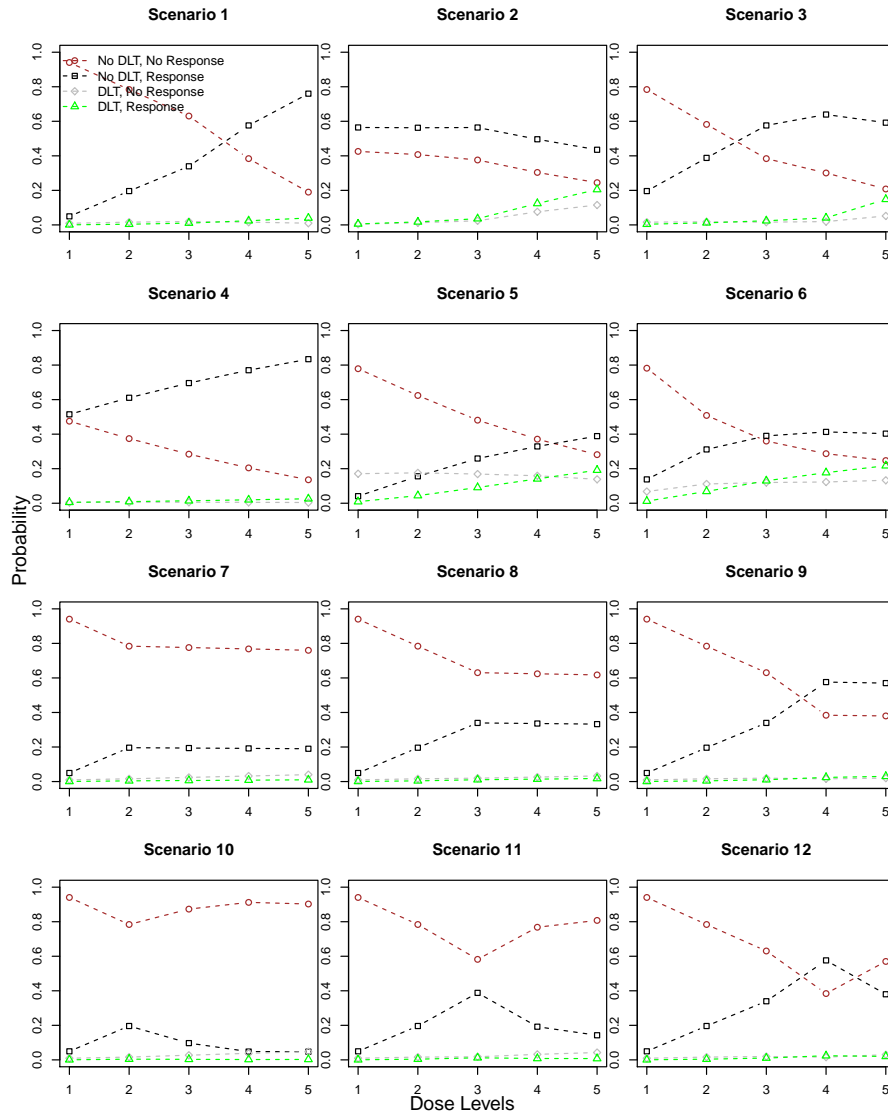

Figure 1: Plot of  $\theta^{(l)}$  for simulation scenarios 1-15.  $r^{(l)} = 10$  for all  $l$ .

## 2 Simulation results

| Scenario | Dose Level |             |                    |                    |                    | Total              |              |
|----------|------------|-------------|--------------------|--------------------|--------------------|--------------------|--------------|
|          | 1          | 2           | 3                  | 4                  | 5                  |                    |              |
| 1        | $(p, q)$   | (0.01,0.05) | (0.02,0.2)         | (0.03,0.35)        | (0.04,0.6)         | <b>(0.05,0.8)</b>  |              |
|          | %          | 2.1         | 6.2                | 3.7                | 4.3                | 83.7               | 100          |
|          | N          | 7.47        | 8.48               | 8.16               | 8.05               | 8.01               | 40.17        |
|          | $(D,R)$    | (0.08,0.38) | (0.14,1.65)        | (0.24,2.89)        | (0.34,4.81)        | (0.43,6.39)        | (1.23,16.12) |
| 2        | $(p, q)$   | (0.01,0.57) | (0.03,0.58)        | (0.06,0.6)         | <b>(0.2,0.62)</b>  | (0.32,0.64)        |              |
|          | %          | 21.7        | 20.3               | 27.7               | 20                 | 10.3               | 100          |
|          | N          | 7.5         | 8.3                | 7.16               | 5.98               | 2.93               | 31.88        |
|          | $(D,R)$    | (0.08,4.3)  | (0.28,4.84)        | (0.46,4.34)        | (1.23,3.66)        | (0.99,1.92)        | (3.04,19.06) |
| 3        | $(p, q)$   | (0.02,0.2)  | (0.03,0.4)         | (0.04,0.6)         | (0.06,0.68)        | <b>(0.2,0.74)</b>  |              |
|          | %          | 4.1         | 5                  | 12.9               | 24.9               | 53.1               | 100          |
|          | N          | 7.86        | 8.34               | 8.3                | 8.36               | 8.46               | 41.32        |
|          | $(D,R)$    | (0.14,1.55) | (0.24,3.29)        | (0.32,5.03)        | (0.49,5.67)        | (1.71,6.27)        | (2.91,21.81) |
| 4        | $(p, q)$   | (0.01,0.52) | (0.01,0.62)        | (0.02,0.71)        | (0.03,0.79)        | <b>(0.03,0.86)</b> |              |
|          | %          | 12.4        | 10.9               | 7.9                | 6.4                | 62.4               | 100          |
|          | N          | 7.46        | 7.58               | 6.96               | 6.1                | 5.59               | 33.68        |
|          | $(D,R)$    | (0.07,3.85) | (0.11,4.68)        | (0.16,4.9)         | (0.14,4.87)        | (0.16,4.8)         | (0.63,23.09) |
| 5        | $(p, q)$   | (0.18,0.05) | (0.22,0.2)         | <b>(0.26,0.35)</b> | (0.3,0.47)         | (0.33,0.58)        |              |
|          | %          | 15.6        | 24.1               | 24                 | 15.6               | 9.9                | 89.2         |
|          | N          | 11.65       | 10.57              | 8.35               | 5.26               | 2.58               | 38.4         |
|          | $(D,R)$    | (2.09,0.6)  | (2.22,2.03)        | (2.2,3.04)         | (1.6,2.5)          | (0.89,1.53)        | (9,9.7)      |
| 6        | $(p, q)$   | (0.08,0.15) | (0.18,0.38)        | <b>(0.25,0.52)</b> | (0.3,0.59)         | (0.35,0.62)        |              |
|          | %          | 14.9        | 26.7               | 29.1               | 19.7               | 8.2                | 98.6         |
|          | N          | 10          | 11.32              | 9.5                | 6                  | 2.62               | 39.44        |
|          | $(D,R)$    | (0.8,1.49)  | (2.03,4.25)        | (2.39,4.91)        | (1.82,3.5)         | (0.96,1.71)        | (7.99,15.85) |
| 7        | $(p, q)$   | (0.01,0.05) | <b>(0.02,0.25)</b> | <b>(0.03,0.25)</b> | <b>(0.04,0.25)</b> | <b>(0.05,0.25)</b> |              |
|          | %          | 1.8         | 20                 | 20                 | 15.4               | 42.8               | 100          |
|          | N          | 7.38        | 8.44               | 8.38               | 6.58               | 5.33               | 36.11        |
|          | $(D,R)$    | (0.06,0.4)  | (0.18,2.12)        | (0.24,2.08)        | (0.23,1.57)        | (0.29,1.35)        | (1,7.53)     |
| 8        | $(p, q)$   | (0.01,0.05) | (0.02,0.25)        | <b>(0.03,0.4)</b>  | <b>(0.04,0.4)</b>  | <b>(0.05,0.4)</b>  |              |
|          | %          | 1.5         | 7.5                | 21.5               | 17.6               | 51.9               | 100          |
|          | N          | 7.46        | 8.23               | 8.13               | 7.75               | 6.17               | 37.74        |
|          | $(D,R)$    | (0.07,0.38) | (0.15,2.07)        | (0.25,3.17)        | (0.31,3.04)        | (0.33,2.51)        | (1.11,11.17) |
| 9        | $(p, q)$   | (0.01,0.05) | (0.02,0.25)        | (0.03,0.4)         | <b>(0.04,0.6)</b>  | <b>(0.05,0.6)</b>  |              |
|          | %          | 1.4         | 7.3                | 7.1                | 19.4               | 64.8               | 100          |
|          | N          | 7.54        | 8.06               | 8.25               | 7.79               | 7.15               | 38.79        |
|          | $(D,R)$    | (0.08,0.38) | (0.14,2.03)        | (0.25,3.36)        | (0.3,4.62)         | (0.33,4.3)         | (1.1,14.69)  |
| 10       | $(p, q)$   | (0.01,0.05) | <b>(0.02,0.25)</b> | (0.03,0.05)        | (0.04,0.05)        | (0.05,0.05)        |              |
|          | %          | 1.2         | 65.7               | 10.3               | 5.2                | 17.6               | 100          |
|          | N          | 7.57        | 8.29               | 9.22               | 3.81               | 2.6                | 31.49        |
|          | $(D,R)$    | (0.09,0.39) | (0.17,2.03)        | (0.26,0.44)        | (0.13,0.18)        | (0.12,0.1)         | (0.77,3.14)  |
| 11       | $(p, q)$   | (0.01,0.05) | (0.02,0.2)         | <b>(0.03,0.4)</b>  | (0.04,0.15)        | (0.05,0.15)        |              |
|          | %          | 2.3         | 4.7                | 61.2               | 10.7               | 21.1               | 100          |
|          | N          | 7.51        | 8.45               | 8.21               | 7.35               | 2.99               | 34.51        |
|          | $(D,R)$    | (0.08,0.37) | (0.17,1.66)        | (0.25,3.32)        | (0.3,1.12)         | (0.13,0.42)        | (0.93,6.89)  |
| 12       | $(p, q)$   | (0.01,0.05) | (0.02,0.2)         | (0.03,0.3)         | <b>(0.04,0.6)</b>  | (0.05,0.3)         |              |
|          | %          | 1.7         | 8.3                | 2.2                | 62.6               | 25.2               | 100          |
|          | N          | 7.52        | 8.41               | 8.37               | 7.9                | 6.89               | 39.09        |
|          | $(D,R)$    | (0.08,0.38) | (0.15,1.66)        | (0.24,2.5)         | (0.33,4.81)        | (0.32,2.09)        | (1.12,11.45) |
| 13       | $(p, q)$   | (0.01,0.05) | (0.02,0.05)        | <b>(0.03,0.3)</b>  | (0.04,0.05)        | (0.05,0.05)        |              |
|          | %          | 15.1        | 0.8                | 64.2               | 6.2                | 13.7               | 100          |
|          | N          | 7.42        | 9.52               | 7.34               | 7.33               | 2.37               | 33.98        |
|          | $(D,R)$    | (0.07,0.35) | (0.2,0.48)         | (0.23,2.21)        | (0.27,0.36)        | (0.14,0.14)        | (0.9,3.53)   |
| 14       | $(p, q)$   | (0.01,0.05) | (0.02,0.05)        | (0.03,0.05)        | <b>(0.04,0.3)</b>  | (0.05,0.05)        |              |
|          | %          | 13.3        | 14.8               | 0.6                | 55.1               | 16.2               | 100          |
|          | N          | 7.47        | 9.53               | 8.93               | 6.69               | 6.19               | 38.8         |
|          | $(D,R)$    | (0.07,0.35) | (0.18,0.5)         | (0.29,0.47)        | (0.31,2)           | (0.33,0.33)        | (1.18,3.65)  |
| 15       | $(p, q)$   | (0.01,0.05) | (0.02,0.05)        | (0.03,0.05)        | (0.04,0.05)        | <b>(0.05,0.3)</b>  |              |
|          | %          | 15          | 13.2               | 11.9               | 0.9                | 59                 | 100          |
|          | N          | 7.46        | 9.46               | 8.57               | 7.73               | 5.42               | 38.64        |
|          | $(D,R)$    | (0.07,0.39) | (0.17,0.42)        | (0.23,0.39)        | (0.29,0.35)        | (0.26,1.59)        | (1.02,3.14)  |

Table 1: Simulation results using the non-parametric model. Cohort size 7 and maximum size 14 for each dose level.  $r^{(l)} = 10$ .

| Scenario | Dose Level |             |                    |                    |                    | Total              |               |
|----------|------------|-------------|--------------------|--------------------|--------------------|--------------------|---------------|
|          | 1          | 2           | 3                  | 4                  | 5                  |                    |               |
| 1        | $(p, q)$   | (0.01,0.05) | (0.02,0.2)         | (0.03,0.35)        | (0.04,0.6)         | <b>(0.05,0.8)</b>  |               |
|          | %          | 8           | 8.2                | 2.7                | 3.7                | 77.4               | 100           |
|          | N          | 7.49        | 7.9                | 7.6                | 7.13               | 7.46               | 37.58         |
|          | (D,R)      | (0.08,0.4)  | (0.16,1.62)        | (0.23,2.53)        | (0.26,4.24)        | (0.36,5.94)        | (1.09,14.72)  |
| 2        | $(p, q)$   | (0.01,0.57) | (0.03,0.58)        | (0.06,0.6)         | <b>(0.2,0.62)</b>  | (0.32,0.64)        |               |
|          | %          | 21          | 18.9               | 19.8               | 20                 | 20.3               | 100           |
|          | N          | 7.59        | 8.09               | 7.21               | 6.78               | 4.61               | 34.27         |
|          | (D,R)      | (0.1,4.38)  | (0.24,4.77)        | (0.46,4.34)        | (1.37,4.14)        | (1.46,2.92)        | (3.62,20.55)  |
| 3        | $(p, q)$   | (0.02,0.2)  | (0.03,0.4)         | (0.04,0.6)         | (0.06,0.68)        | <b>(0.2,0.74)</b>  |               |
|          | %          | 4.5         | 5.8                | 12.3               | 19.4               | 58                 | 100           |
|          | N          | 7.8         | 8.32               | 8.19               | 8.36               | 8.94               | 41.61         |
|          | (D,R)      | (0.14,1.53) | (0.25,3.33)        | (0.31,4.82)        | (0.53,5.66)        | (1.77,6.58)        | (3.21,9.1)    |
| 4        | $(p, q)$   | (0.01,0.52) | (0.01,0.62)        | (0.02,0.71)        | (0.03,0.79)        | <b>(0.03,0.86)</b> |               |
|          | %          | 12.6        | 12.4               | 11.8               | 11.1               | 52.1               | 100           |
|          | N          | 7.47        | 7.51               | 6.92               | 6.01               | 5.1                | 33.01         |
|          | (D,R)      | (0.08,3.91) | (0.1,4.67)         | (0.16,4.91)        | (0.15,4.73)        | (0.16,4.41)        | (0.64,22.64)  |
| 5        | $(p, q)$   | (0.18,0.05) | (0.22,0.2)         | <b>(0.26,0.35)</b> | (0.3,0.47)         | (0.33,0.58)        |               |
|          | %          | 11.8        | 18.3               | 21.5               | 18                 | 26.9               | 96.5          |
|          | N          | 12.28       | 11.94              | 10.35              | 7.92               | 5.38               | 47.87         |
|          | (D,R)      | (2.26,0.64) | (2.6,2.39)         | (2.68,3.6)         | (2.38,3.75)        | (1.79,3.11)        | (11.71,13.49) |
| 6        | $(p, q)$   | (0.08,0.15) | (0.18,0.38)        | <b>(0.25,0.52)</b> | (0.3,0.59)         | (0.35,0.62)        |               |
|          | %          | 7.9         | 21.4               | 28.3               | 21.4               | 20.8               | 99.8          |
|          | N          | 10.08       | 11.87              | 11.14              | 8.22               | 4.86               | 46.18         |
|          | (D,R)      | (0.79,1.5)  | (2.13,4.53)        | (2.77,5.83)        | (2.43,4.84)        | (1.69,3.02)        | (9.81,19.71)  |
| 7        | $(p, q)$   | (0.01,0.05) | <b>(0.02,0.25)</b> | <b>(0.03,0.25)</b> | <b>(0.04,0.25)</b> | <b>(0.05,0.25)</b> |               |
|          | %          | 4.6         | 20.5               | 20.5               | 15.6               | 38.8               | 100           |
|          | N          | 7.55        | 7.85               | 7.66               | 6.37               | 4.68               | 34.11         |
|          | (D,R)      | (0.09,0.4)  | (0.14,1.98)        | (0.2,1.96)         | (0.27,1.57)        | (0.21,1.11)        | (0.91,7.01)   |
| 8        | $(p, q)$   | (0.01,0.05) | (0.02,0.25)        | <b>(0.03,0.4)</b>  | <b>(0.04,0.4)</b>  | <b>(0.05,0.4)</b>  |               |
|          | %          | 4.9         | 6.4                | 19.4               | 17                 | 52.3               | 100           |
|          | N          | 7.4         | 8.04               | 7.94               | 7.57               | 6.06               | 37.02         |
|          | (D,R)      | (0.06,0.36) | (0.18,1.97)        | (0.24,3.18)        | (0.31,3.06)        | (0.29,2.5)         | (1.07,11.07)  |
| 9        | $(p, q)$   | (0.01,0.05) | (0.02,0.25)        | (0.03,0.4)         | <b>(0.04,0.6)</b>  | <b>(0.05,0.6)</b>  |               |
|          | %          | 3.7         | 9.3                | 4.8                | 20.5               | 61.7               | 100           |
|          | N          | 7.53        | 7.91               | 7.8                | 7.58               | 7.21               | 38.04         |
|          | (D,R)      | (0.08,0.37) | (0.16,2.03)        | (0.21,3.06)        | (0.32,4.57)        | (0.36,4.34)        | (1.14,14.37)  |
| 10       | $(p, q)$   | (0.01,0.05) | <b>(0.02,0.25)</b> | (0.03,0.05)        | (0.04,0.05)        | (0.05,0.05)        |               |
|          | %          | 3.5         | 69.6               | 12.7               | 5.5                | 8.7                | 100           |
|          | N          | 7.46        | 7.83               | 7.27               | 2.23               | 1.2                | 25.98         |
|          | (D,R)      | (0.07,0.38) | (0.14,1.95)        | (0.21,0.37)        | (0.09,0.12)        | (0.07,0.07)        | (0.58,2.89)   |
| 11       | $(p, q)$   | (0.01,0.05) | (0.02,0.2)         | <b>(0.03,0.4)</b>  | (0.04,0.15)        | (0.05,0.15)        |               |
|          | %          | 7.6         | 6                  | 60.4               | 11.5               | 14.5               | 100           |
|          | N          | 7.55        | 7.88               | 7.62               | 6.75               | 2.25               | 32.05         |
|          | (D,R)      | (0.08,0.4)  | (0.14,1.58)        | (0.22,3.11)        | (0.26,0.98)        | (0.12,0.34)        | (0.82,6.4)    |
| 12       | $(p, q)$   | (0.01,0.05) | (0.02,0.2)         | (0.03,0.3)         | <b>(0.04,0.6)</b>  | (0.05,0.3)         |               |
|          | %          | 6.8         | 12.3               | 1.8                | 56.7               | 22.4               | 100           |
|          | N          | 7.47        | 7.76               | 7.61               | 7.03               | 6.2                | 36.06         |
|          | (D,R)      | (0.07,0.37) | (0.13,1.52)        | (0.21,2.21)        | (0.28,4.26)        | (0.28,1.87)        | (0.97,10.23)  |
| 13       | $(p, q)$   | (0.01,0.05) | (0.02,0.05)        | <b>(0.03,0.3)</b>  | (0.04,0.05)        | (0.05,0.05)        |               |
|          | %          | 20          | 2.7                | 62                 | 9                  | 6.3                | 100           |
|          | N          | 7.47        | 7.76               | 6.65               | 5.88               | 1.29               | 29.05         |
|          | (D,R)      | (0.07,0.38) | (0.16,0.39)        | (0.19,2.05)        | (0.22,0.29)        | (0.08,0.07)        | (0.72,3.18)   |
| 14       | $(p, q)$   | (0.01,0.05) | (0.02,0.05)        | (0.03,0.05)        | <b>(0.04,0.3)</b>  | (0.05,0.05)        |               |
|          | %          | 21.1        | 21.3               | 2.5                | 43.4               | 11.7               | 100           |
|          | N          | 7.44        | 7.85               | 6.24               | 5.1                | 4.2                | 30.83         |
|          | (D,R)      | (0.07,0.38) | (0.16,0.42)        | (0.16,0.3)         | (0.23,1.5)         | (0.22,0.21)        | (0.84,2.81)   |
| 15       | $(p, q)$   | (0.01,0.05) | (0.02,0.05)        | (0.03,0.05)        | (0.04,0.05)        | <b>(0.05,0.3)</b>  |               |
|          | %          | 20          | 19.3               | 15.7               | 1.5                | 43.5               | 100           |
|          | N          | 7.54        | 7.75               | 6.47               | 4.98               | 4.17               | 30.91         |
|          | (D,R)      | (0.09,0.42) | (0.16,0.42)        | (0.2,0.33)         | (0.17,0.26)        | (0.22,1.23)        | (0.84,2.66)   |

Table 2: Simulation results using the non-parametric+ model. Cohort size 7 and maximum size 14 for each dose level.  $r^{(l)} = 10$ .

| Scenario | Dose Level |             |                    |                    |                    | Total              |               |
|----------|------------|-------------|--------------------|--------------------|--------------------|--------------------|---------------|
|          | 1          | 2           | 3                  | 4                  | 5                  |                    |               |
| 1        | $(p, q)$   | (0.01,0.05) | (0.02,0.2)         | (0.03,0.35)        | (0.04,0.6)         | <b>(0.05,0.8)</b>  |               |
|          | %          | 5.6         | 7.5                | 4.1                | 4.4                | 78.4               | 100           |
|          | N          | 7.55        | 7.16               | 6.94               | 6.34               | 6.24               | 34.22         |
|          | (D,R)      | (0.08,0.39) | (0.15,1.46)        | (0.2,2.45)         | (0.24,3.81)        | (0.32,4.99)        | (0.99,13.1)   |
| 2        | $(p, q)$   | (0.01,0.57) | (0.03,0.58)        | (0.06,0.6)         | <b>(0.2,0.62)</b>  | (0.32,0.64)        |               |
|          | %          | 20.2        | 18.4               | 19                 | 21.3               | 21.1               | 100           |
|          | N          | 7.44        | 7.2                | 6.4                | 6.71               | 4.66               | 32.4          |
|          | (D,R)      | (0.07,4.21) | (0.21,4.13)        | (0.39,3.9)         | (1.36,4.14)        | (1.5,2.94)         | (3.53,19.32)  |
| 3        | $(p, q)$   | (0.02,0.2)  | (0.03,0.4)         | (0.04,0.6)         | (0.06,0.68)        | <b>(0.2,0.74)</b>  |               |
|          | %          | 5.1         | 5.4                | 13.1               | 14.6               | 61.8               | 100           |
|          | N          | 7.97        | 7.43               | 7.26               | 6.97               | 8.96               | 38.59         |
|          | (D,R)      | (0.17,1.57) | (0.22,2.95)        | (0.28,4.31)        | (0.42,4.73)        | (1.83,6.68)        | (2.92,20.24)  |
| 4        | $(p, q)$   | (0.01,0.52) | (0.01,0.62)        | (0.02,0.71)        | (0.03,0.79)        | <b>(0.03,0.86)</b> |               |
|          | %          | 11.6        | 10                 | 9.9                | 11                 | 57.5               | 100           |
|          | N          | 7.43        | 7.08               | 6.27               | 5.53               | 4.85               | 31.16         |
|          | (D,R)      | (0.06,3.95) | (0.1,4.34)         | (0.13,4.47)        | (0.13,4.41)        | (0.12,4.19)        | (0.54,21.36)  |
| 5        | $(p, q)$   | (0.18,0.05) | (0.22,0.2)         | <b>(0.26,0.35)</b> | (0.3,0.47)         | (0.33,0.58)        |               |
|          | %          | 9.3         | 12.6               | 19.7               | 19.1               | 33.7               | 94.4          |
|          | N          | 12.11       | 11.73              | 11.06              | 9.11               | 6.38               | 50.39         |
|          | (D,R)      | (2.24,0.65) | (2.59,2.28)        | (2.88,3.89)        | (2.89,4.39)        | (2.08,3.65)        | (12.69,14.86) |
| 6        | $(p, q)$   | (0.08,0.15) | (0.18,0.38)        | <b>(0.25,0.52)</b> | (0.3,0.59)         | (0.35,0.62)        |               |
|          | %          | 4.8         | 15.6               | 25.2               | 31                 | 23.3               | 99.9          |
|          | N          | 9.99        | 11.45              | 11.97              | 9.71               | 5.85               | 48.97         |
|          | (D,R)      | (0.76,1.5)  | (2.1,4.43)         | (3.06,6.17)        | (2.9,5.73)         | (2.02,3.6)         | (10.84,21.43) |
| 7        | $(p, q)$   | (0.01,0.05) | <b>(0.02,0.25)</b> | <b>(0.03,0.25)</b> | <b>(0.04,0.25)</b> | <b>(0.05,0.25)</b> |               |
|          | %          | 3.5         | 23.2               | 17.6               | 16.7               | 39                 | 100           |
|          | N          | 7.46        | 7.08               | 7.05               | 5.32               | 4.12               | 31.03         |
|          | (D,R)      | (0.07,0.36) | (0.14,1.76)        | (0.2,1.72)         | (0.19,1.37)        | (0.23,1.01)        | (0.82,6.22)   |
| 8        | $(p, q)$   | (0.01,0.05) | (0.02,0.25)        | <b>(0.03,0.4)</b>  | <b>(0.04,0.4)</b>  | <b>(0.05,0.4)</b>  |               |
|          | %          | 2.7         | 8.1                | 19.3               | 20                 | 49.9               | 100           |
|          | N          | 7.47        | 7.16               | 7.15               | 6.5                | 5.19               | 33.46         |
|          | (D,R)      | (0.07,0.34) | (0.16,1.79)        | (0.23,2.84)        | (0.25,2.63)        | (0.26,2.03)        | (0.97,9.64)   |
| 9        | $(p, q)$   | (0.01,0.05) | (0.02,0.25)        | (0.03,0.4)         | <b>(0.04,0.6)</b>  | <b>(0.05,0.6)</b>  |               |
|          | %          | 3.3         | 7.3                | 5.8                | 20.3               | 63.3               | 100           |
|          | N          | 7.46        | 7.11               | 7.09               | 6.45               | 6.24               | 34.36         |
|          | (D,R)      | (0.07,0.38) | (0.14,1.74)        | (0.22,2.8)         | (0.26,3.88)        | (0.3,3.72)         | (0.99,12.51)  |
| 10       | $(p, q)$   | (0.01,0.05) | <b>(0.02,0.25)</b> | (0.03,0.05)        | (0.04,0.05)        | (0.05,0.05)        |               |
|          | %          | 2.6         | 66.5               | 14.7               | 5.9                | 10.3               | 100           |
|          | N          | 7.56        | 7.2                | 7.02               | 2.25               | 1.2                | 25.23         |
|          | (D,R)      | (0.08,0.37) | (0.17,1.77)        | (0.2,0.34)         | (0.1,0.12)         | (0.07,0.05)        | (0.61,2.66)   |
| 11       | $(p, q)$   | (0.01,0.05) | (0.02,0.2)         | <b>(0.03,0.4)</b>  | (0.04,0.15)        | (0.05,0.15)        |               |
|          | %          | 5.6         | 4.7                | 56.8               | 12.3               | 20.6               | 100           |
|          | N          | 7.5         | 7.17               | 6.87               | 6.4                | 2.43               | 30.38         |
|          | (D,R)      | (0.08,0.38) | (0.15,1.44)        | (0.19,2.71)        | (0.24,0.93)        | (0.13,0.38)        | (0.79,5.83)   |
| 12       | $(p, q)$   | (0.01,0.05) | (0.02,0.2)         | (0.03,0.3)         | <b>(0.04,0.6)</b>  | (0.05,0.3)         |               |
|          | %          | 5.8         | 11.1               | 2.8                | 52.7               | 27.6               | 100           |
|          | N          | 7.4         | 7.11               | 6.89               | 6.07               | 5.85               | 33.31         |
|          | (D,R)      | (0.06,0.36) | (0.13,1.47)        | (0.21,2.07)        | (0.25,3.64)        | (0.29,1.82)        | (0.94,9.35)   |
| 13       | $(p, q)$   | (0.01,0.05) | (0.02,0.05)        | <b>(0.03,0.3)</b>  | (0.04,0.05)        | (0.05,0.05)        |               |
|          | %          | 20.4        | 2                  | 58.9               | 9.8                | 8.9                | 100           |
|          | N          | 7.38        | 7.1                | 5.92               | 5.52               | 1.36               | 27.28         |
|          | (D,R)      | (0.06,0.4)  | (0.15,0.37)        | (0.18,1.85)        | (0.21,0.28)        | (0.07,0.07)        | (0.67,2.98)   |
| 14       | $(p, q)$   | (0.01,0.05) | (0.02,0.05)        | (0.03,0.05)        | <b>(0.04,0.3)</b>  | (0.05,0.05)        |               |
|          | %          | 18.6        | 20.8               | 2.4                | 44.8               | 13.4               | 100           |
|          | N          | 7.46        | 7.13               | 6                  | 4.56               | 4.16               | 29.32         |
|          | (D,R)      | (0.07,0.39) | (0.16,0.4)         | (0.19,0.31)        | (0.18,1.35)        | (0.2,0.2)          | (0.79,2.66)   |
| 15       | $(p, q)$   | (0.01,0.05) | (0.02,0.05)        | (0.03,0.05)        | (0.04,0.05)        | <b>(0.05,0.3)</b>  |               |
|          | %          | 20.2        | 20.6               | 13.6               | 1.2                | 44.4               | 100           |
|          | N          | 7.52        | 7.14               | 5.85               | 4.35               | 3.44               | 28.3          |
|          | (D,R)      | (0.08,0.37) | (0.16,0.38)        | (0.16,0.27)        | (0.17,0.21)        | (0.18,1.06)        | (0.75,2.29)   |

Table 3: Simulation results using the parametric model. Cohort size 7 and maximum size 14 for each dose level.  $r^{(l)} = 10$ .

| Scenario | Dose Level |             |                    |                    |                    | Total              |               |
|----------|------------|-------------|--------------------|--------------------|--------------------|--------------------|---------------|
|          | 1          | 2           | 3                  | 4                  | 5                  |                    |               |
| 1        | $(p, q)$   | (0.01,0.05) | (0.02,0.2)         | (0.03,0.35)        | (0.04,0.6)         | <b>(0.05,0.8)</b>  |               |
|          | %          | 4.8         | 8.7                | 4.2                | 3.5                | 78.8               | 100           |
|          | N          | 7.41        | 7.12               | 7.04               | 6.31               | 6.2                | 34.09         |
|          | $(D, R)$   | (0.07,0.37) | (0.13,1.45)        | (0.21,2.48)        | (0.26,3.77)        | (0.32,4.97)        | (0.99,13.04)  |
| 2        | $(p, q)$   | (0.01,0.57) | (0.03,0.58)        | (0.06,0.6)         | <b>(0.2,0.62)</b>  | (0.32,0.64)        |               |
|          | %          | 18.4        | 18.7               | 18.9               | 23                 | 21                 | 100           |
|          | N          | 7.36        | 7.2                | 6.42               | 6.94               | 4.79               | 32.71         |
|          | $(D, R)$   | (0.06,4.14) | (0.22,4.18)        | (0.42,3.91)        | (1.43,4.33)        | (1.52,3.08)        | (3.65,19.64)  |
| 3        | $(p, q)$   | (0.02,0.2)  | (0.03,0.4)         | (0.04,0.6)         | (0.06,0.68)        | <b>(0.2,0.74)</b>  |               |
|          | %          | 4.9         | 5                  | 12.7               | 16.1               | 61.3               | 100           |
|          | N          | 7.86        | 7.39               | 7.27               | 7.19               | 9.1                | 38.81         |
|          | $(D, R)$   | (0.15,1.58) | (0.23,2.96)        | (0.3,4.39)         | (0.45,4.86)        | (1.83,6.74)        | (2.95,20.53)  |
| 4        | $(p, q)$   | (0.01,0.52) | (0.01,0.62)        | (0.02,0.71)        | (0.03,0.79)        | <b>(0.03,0.86)</b> |               |
|          | %          | 11.6        | 12.7               | 12.9               | 11.7               | 51.1               | 100           |
|          | N          | 7.44        | 7.1                | 6.34               | 5.36               | 4.48               | 30.71         |
|          | $(D, R)$   | (0.07,3.82) | (0.1,4.47)         | (0.14,4.5)         | (0.12,4.23)        | (0.13,3.84)        | (0.57,20.86)  |
| 5        | $(p, q)$   | (0.18,0.05) | (0.22,0.2)         | <b>(0.26,0.35)</b> | (0.3,0.47)         | (0.33,0.58)        |               |
|          | %          | 8.4         | 12.8               | 19                 | 19.5               | 36.9               | 96.6          |
|          | N          | 12.03       | 12.14              | 11.42              | 9.43               | 6.87               | 51.89         |
|          | $(D, R)$   | (2.12,0.56) | (2.69,2.34)        | (2.98,4.02)        | (2.87,4.49)        | (2.3,4.01)         | (12.96,15.42) |
| 6        | $(p, q)$   | (0.08,0.15) | (0.18,0.38)        | <b>(0.25,0.52)</b> | (0.3,0.59)         | (0.35,0.62)        |               |
|          | %          | 5.1         | 14                 | 27                 | 28.8               | 24.8               | 99.7          |
|          | N          | 10.04       | 11.16              | 11.85              | 9.65               | 5.8                | 48.5          |
|          | $(D, R)$   | (0.8,1.48)  | (2,4.14)           | (2.99,6.09)        | (2.83,5.65)        | (2.08,3.6)         | (10.71,20.97) |
| 7        | $(p, q)$   | (0.01,0.05) | <b>(0.02,0.25)</b> | <b>(0.03,0.25)</b> | <b>(0.04,0.25)</b> | <b>(0.05,0.25)</b> |               |
|          | %          | 3.6         | 20.5               | 19.2               | 14.7               | 42                 | 100           |
|          | N          | 7.55        | 7.13               | 7.08               | 5.46               | 4.27               | 31.49         |
|          | $(D, R)$   | (0.08,0.37) | (0.15,1.79)        | (0.22,1.82)        | (0.22,1.39)        | (0.22,1.06)        | (0.89,6.42)   |
| 8        | $(p, q)$   | (0.01,0.05) | (0.02,0.25)        | <b>(0.03,0.4)</b>  | <b>(0.04,0.4)</b>  | <b>(0.05,0.4)</b>  |               |
|          | %          | 3.5         | 7.7                | 20                 | 17                 | 51.8               | 100           |
|          | N          | 7.41        | 7.11               | 7.01               | 6.38               | 5.15               | 33.06         |
|          | $(D, R)$   | (0.06,0.34) | (0.12,1.81)        | (0.21,2.81)        | (0.25,2.56)        | (0.26,2.04)        | (0.9,9.55)    |
| 9        | $(p, q)$   | (0.01,0.05) | (0.02,0.25)        | (0.03,0.4)         | <b>(0.04,0.6)</b>  | <b>(0.05,0.6)</b>  |               |
|          | %          | 3.9         | 8.1                | 5.1                | 19.3               | 63.6               | 100           |
|          | N          | 7.41        | 7.11               | 7.02               | 6.34               | 6.15               | 34.02         |
|          | $(D, R)$   | (0.06,0.36) | (0.14,1.82)        | (0.2,2.78)         | (0.25,3.85)        | (0.28,3.68)        | (0.93,12.5)   |
| 10       | $(p, q)$   | (0.01,0.05) | <b>(0.02,0.25)</b> | (0.03,0.05)        | (0.04,0.05)        | (0.05,0.05)        |               |
|          | %          | 5.5         | 66.4               | 14.7               | 6.6                | 6.8                | 100           |
|          | N          | 7.46        | 7.11               | 6.69               | 2                  | 0.98               | 24.24         |
|          | $(D, R)$   | (0.07,0.38) | (0.14,1.71)        | (0.21,0.34)        | (0.08,0.1)         | (0.05,0.05)        | (0.54,2.59)   |
| 11       | $(p, q)$   | (0.01,0.05) | (0.02,0.2)         | <b>(0.03,0.4)</b>  | (0.04,0.15)        | (0.05,0.15)        |               |
|          | %          | 6           | 5.1                | 56.2               | 12.7               | 20                 | 100           |
|          | N          | 7.48        | 7.14               | 6.87               | 6.34               | 2.44               | 30.27         |
|          | $(D, R)$   | (0.08,0.37) | (0.14,1.42)        | (0.19,2.7)         | (0.24,0.94)        | (0.13,0.37)        | (0.77,5.81)   |
| 12       | $(p, q)$   | (0.01,0.05) | (0.02,0.2)         | (0.03,0.3)         | <b>(0.04,0.6)</b>  | (0.05,0.3)         |               |
|          | %          | 6.4         | 12.2               | 2                  | 53.5               | 25.9               | 100           |
|          | N          | 7.59        | 7.2                | 6.94               | 6.01               | 5.68               | 33.43         |
|          | $(D, R)$   | (0.1,0.36)  | (0.14,1.4)         | (0.21,2.01)        | (0.22,3.64)        | (0.27,1.66)        | (0.94,9.08)   |
| 13       | $(p, q)$   | (0.01,0.05) | (0.02,0.05)        | <b>(0.03,0.3)</b>  | (0.04,0.05)        | (0.05,0.05)        |               |
|          | %          | 22.1        | 2.6                | 57.7               | 10                 | 7.6                | 100           |
|          | N          | 7.55        | 7.13               | 5.8                | 5.35               | 1.27               | 27.08         |
|          | $(D, R)$   | (0.09,0.41) | (0.13,0.35)        | (0.19,1.74)        | (0.21,0.29)        | (0.05,0.07)        | (0.67,2.85)   |
| 14       | $(p, q)$   | (0.01,0.05) | (0.02,0.05)        | (0.03,0.05)        | <b>(0.04,0.3)</b>  | (0.05,0.05)        |               |
|          | %          | 19.7        | 20.7               | 1.8                | 47.3               | 10.5               | 100           |
|          | N          | 7.46        | 7.13               | 5.77               | 4.3                | 4.09               | 28.75         |
|          | $(D, R)$   | (0.07,0.34) | (0.15,0.34)        | (0.15,0.28)        | (0.17,1.31)        | (0.17,0.16)        | (0.71,2.44)   |
| 15       | $(p, q)$   | (0.01,0.05) | (0.02,0.05)        | (0.03,0.05)        | (0.04,0.05)        | <b>(0.05,0.3)</b>  |               |
|          | %          | 22.2        | 20.3               | 16.9               | 1.1                | 39.5               | 100           |
|          | N          | 7.39        | 7.11               | 5.73               | 4.16               | 3.04               | 27.43         |
|          | $(D, R)$   | (0.06,0.38) | (0.16,0.34)        | (0.17,0.3)         | (0.18,0.2)         | (0.16,0.86)        | (0.74,2.08)   |

Table 4: Simulation results using the parametric+ model. Cohort size 7 and maximum size 14 for each dose level.  $r^{(l)} = 10$ .

### 3 Simulation results for robustness analysis

#### 3.1 10+10

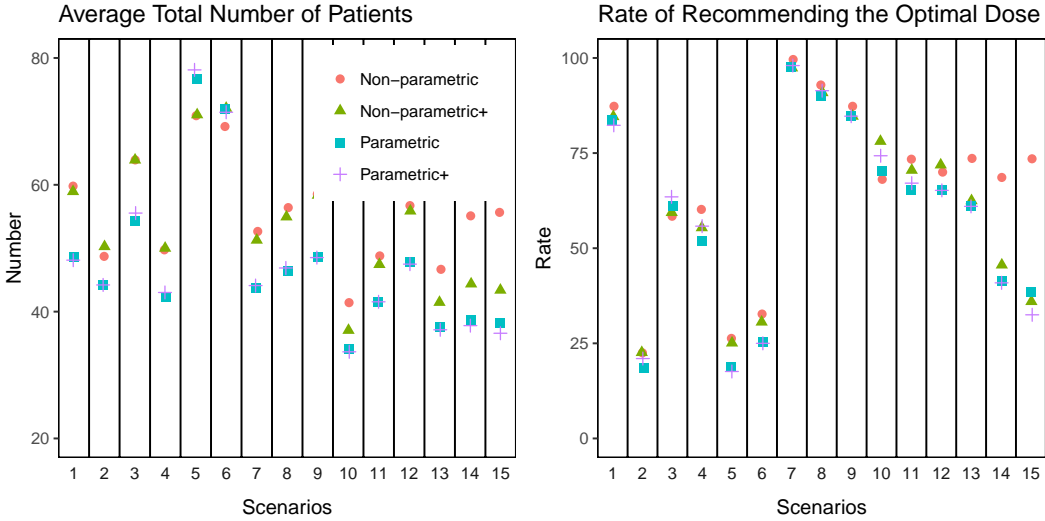

Figure 2: Average total number of patients and the average rate of reporting the optimal dose levels(s) for Scenarios 1-15.



| Scenario | Dose Level |             |                    |                    |                    | Total              |               |
|----------|------------|-------------|--------------------|--------------------|--------------------|--------------------|---------------|
|          | 1          | 2           | 3                  | 4                  | 5                  |                    |               |
| 1        | $(p, q)$   | (0.01,0.05) | (0.02,0.2)         | (0.03,0.35)        | (0.04,0.6)         | <b>(0.05,0.8)</b>  |               |
|          | %          | 1.5         | 5.7                | 2.2                | 3.3                | 87.3               | 100           |
|          | N          | 10.9        | 11.72              | 12.13              | 12.32              | 12.72              | 59.79         |
|          | (D,R)      | (0.11,0.55) | (0.22,2.32)        | (0.36,4.23)        | (0.5,7.51)         | (0.65,10.16)       | (1.83,24.76)  |
| 2        | $(p, q)$   | (0.01,0.57) | (0.03,0.58)        | (0.06,0.6)         | <b>(0.2,0.62)</b>  | (0.32,0.64)        |               |
|          | %          | 24          | 19                 | 19.3               | 22.5               | 15.2               | 100           |
|          | N          | 10.96       | 12.15              | 10.41              | 9.33               | 5.86               | 48.71         |
|          | (D,R)      | (0.1,6.25)  | (0.36,7.02)        | (0.62,6.25)        | (1.76,5.76)        | (1.85,3.74)        | (4.7,29.03)   |
| 3        | $(p, q)$   | (0.02,0.2)  | (0.03,0.4)         | (0.04,0.6)         | (0.06,0.68)        | <b>(0.2,0.74)</b>  |               |
|          | %          | 3           | 4.5                | 12.9               | 21.2               | 58.4               | 100           |
|          | N          | 11.91       | 12.47              | 12.78              | 13.28              | 13.48              | 63.92         |
|          | (D,R)      | (0.23,2.36) | (0.38,5.03)        | (0.5,7.78)         | (0.83,9.11)        | (2.73,9.91)        | (4.68,34.19)  |
| 4        | $(p, q)$   | (0.01,0.52) | (0.01,0.62)        | (0.02,0.71)        | (0.03,0.79)        | <b>(0.03,0.86)</b> |               |
|          | %          | 13.5        | 10.6               | 8.9                | 6.8                | 60.2               | 100           |
|          | N          | 10.83       | 11.19              | 10.09              | 9.28               | 8.35               | 49.74         |
|          | (D,R)      | (0.1,5.72)  | (0.16,6.89)        | (0.2,7.18)         | (0.25,7.33)        | (0.26,7.19)        | (0.97,34.31)  |
| 5        | $(p, q)$   | (0.18,0.05) | (0.22,0.2)         | <b>(0.26,0.35)</b> | (0.3,0.47)         | (0.33,0.58)        |               |
|          | %          | 10.1        | 18.2               | 26.3               | 20.6               | 21.9               | 97.1          |
|          | N          | 18.33       | 17.97              | 15.82              | 11.77              | 7.01               | 70.9          |
|          | (D,R)      | (3.22,0.85) | (3.94,3.5)         | (4,5.59)           | (3.5,5.49)         | (2.36,4.1)         | (17.02,19.52) |
| 6        | $(p, q)$   | (0.08,0.15) | (0.18,0.38)        | <b>(0.25,0.52)</b> | (0.3,0.59)         | (0.35,0.62)        |               |
|          | %          | 5.4         | 21.4               | 32.7               | 26.5               | 13.9               | 99.9          |
|          | N          | 15.59       | 18.31              | 16.98              | 12.17              | 6.14               | 69.19         |
|          | (D,R)      | (1.23,2.35) | (3.29,6.95)        | (4.29,8.92)        | (3.61,7.2)         | (2.17,3.8)         | (14.59,29.22) |
| 7        | $(p, q)$   | (0.01,0.05) | <b>(0.02,0.25)</b> | <b>(0.03,0.25)</b> | <b>(0.04,0.25)</b> | <b>(0.05,0.25)</b> |               |
|          | %          | 0.4         | 20.8               | 22.3               | 16                 | 40.5               | 100           |
|          | N          | 10.93       | 11.91              | 12.32              | 9.98               | 7.51               | 52.65         |
|          | (D,R)      | (0.11,0.54) | (0.24,3.05)        | (0.4,3.12)         | (0.41,2.48)        | (0.39,1.82)        | (1.55,11.01)  |
| 8        | $(p, q)$   | (0.01,0.05) | (0.02,0.25)        | <b>(0.03,0.4)</b>  | <b>(0.04,0.4)</b>  | <b>(0.05,0.4)</b>  |               |
|          | %          | 0.9         | 6.2                | 22                 | 22.3               | 48.6               | 100           |
|          | N          | 11          | 11.84              | 12.37              | 11.91              | 9.28               | 56.4          |
|          | (D,R)      | (0.11,0.54) | (0.24,2.91)        | (0.37,4.97)        | (0.48,4.86)        | (0.46,3.64)        | (1.65,16.94)  |
| 9        | $(p, q)$   | (0.01,0.05) | (0.02,0.25)        | (0.03,0.4)         | <b>(0.04,0.6)</b>  | <b>(0.05,0.6)</b>  |               |
|          | %          | 0.6         | 7.3                | 4.8                | 23.6               | 63.7               | 100           |
|          | N          | 10.91       | 11.75              | 12.25              | 12.21              | 11.4               | 58.52         |
|          | (D,R)      | (0.11,0.56) | (0.22,2.98)        | (0.34,4.97)        | (0.5,7.35)         | (0.59,6.73)        | (1.75,22.59)  |
| 10       | $(p, q)$   | (0.01,0.05) | <b>(0.02,0.25)</b> | (0.03,0.05)        | (0.04,0.05)        | (0.05,0.05)        |               |
|          | %          | 0.6         | 68.1               | 6.3                | 2.5                | 22.5               | 100           |
|          | N          | 11.01       | 11.71              | 11.03              | 4.1                | 3.57               | 41.42         |
|          | (D,R)      | (0.12,0.55) | (0.22,2.98)        | (0.32,0.56)        | (0.16,0.2)         | (0.19,0.18)        | (1.02,4.47)   |
| 11       | $(p, q)$   | (0.01,0.05) | (0.02,0.2)         | <b>(0.03,0.4)</b>  | (0.04,0.15)        | (0.05,0.15)        |               |
|          | %          | 1.4         | 3.2                | 73.4               | 7.3                | 14.7               | 100           |
|          | N          | 10.96       | 11.92              | 12.39              | 10.62              | 2.9                | 48.79         |
|          | (D,R)      | (0.11,0.57) | (0.24,2.37)        | (0.39,4.94)        | (0.4,1.57)         | (0.14,0.46)        | (1.28,9.91)   |
| 12       | $(p, q)$   | (0.01,0.05) | (0.02,0.2)         | (0.03,0.3)         | <b>(0.04,0.6)</b>  | (0.05,0.3)         |               |
|          | %          | 1.9         | 8.6                | 1.5                | 70                 | 18                 | 100           |
|          | N          | 10.91       | 11.49              | 12.38              | 12.06              | 9.88               | 56.72         |
|          | (D,R)      | (0.1,0.54)  | (0.19,2.26)        | (0.38,3.72)        | (0.51,7.17)        | (0.46,2.96)        | (1.64,16.66)  |
| 13       | $(p, q)$   | (0.01,0.05) | (0.02,0.05)        | <b>(0.03,0.3)</b>  | (0.04,0.05)        | (0.05,0.05)        |               |
|          | %          | 9.2         | 0                  | 73.6               | 3.5                | 13.7               | 100           |
|          | N          | 10.99       | 11.89              | 11.42              | 9.92               | 2.45               | 46.67         |
|          | (D,R)      | (0.13,0.61) | (0.24,0.57)        | (0.33,3.4)         | (0.39,0.47)        | (0.12,0.12)        | (1.21,5.17)   |
| 14       | $(p, q)$   | (0.01,0.05) | (0.02,0.05)        | (0.03,0.05)        | <b>(0.04,0.3)</b>  | (0.05,0.05)        |               |
|          | %          | 7.8         | 8.1                | 0.2                | 68.6               | 15.3               | 100           |
|          | N          | 10.88       | 11.85              | 11.73              | 11.23              | 9.41               | 55.1          |
|          | (D,R)      | (0.1,0.56)  | (0.23,0.61)        | (0.38,0.62)        | (0.47,3.43)        | (0.46,0.49)        | (1.63,5.72)   |
| 15       | $(p, q)$   | (0.01,0.05) | (0.02,0.05)        | (0.03,0.05)        | (0.04,0.05)        | <b>(0.05,0.3)</b>  |               |
|          | %          | 7.8         | 10.1               | 8.2                | 0.4                | 73.5               | 100           |
|          | N          | 10.97       | 11.83              | 11.65              | 10.82              | 10.38              | 55.65         |
|          | (D,R)      | (0.11,0.53) | (0.23,0.6)         | (0.35,0.56)        | (0.42,0.54)        | (0.51,3.08)        | (1.62,5.33)   |

Table 5: Simulation results using the non-parametric model. Cohort size 10 and maximum size 20 for each dose level.  $r^{(l)} = 10$ .

| Scenario | Dose Level |             |                    |                    |                    | Total              |               |
|----------|------------|-------------|--------------------|--------------------|--------------------|--------------------|---------------|
|          | 1          | 2           | 3                  | 4                  | 5                  |                    |               |
| 1        | $(p, q)$   | (0.01,0.05) | (0.02,0.2)         | (0.03,0.35)        | (0.04,0.6)         | <b>(0.05,0.8)</b>  |               |
|          | %          | 4.2         | 5                  | 2.8                | 3.4                | 84.6               | 100           |
|          | N          | 10.84       | 11.8               | 11.83              | 12.35              | 12.12              | 58.94         |
|          | (D,R)      | (0.1,0.54)  | (0.23,2.31)        | (0.34,4.09)        | (0.52,7.5)         | (0.6,9.71)         | (1.8,24.14)   |
| 2        | $(p, q)$   | (0.01,0.57) | (0.03,0.58)        | (0.06,0.6)         | <b>(0.2,0.62)</b>  | (0.32,0.64)        |               |
|          | %          | 21.6        | 20.1               | 19.1               | 22.6               | 16.6               | 100           |
|          | N          | 10.85       | 12.4               | 10.87              | 9.76               | 6.38               | 50.26         |
|          | (D,R)      | (0.1,6.06)  | (0.39,7.17)        | (0.66,6.55)        | (1.96,6.06)        | (2.03,4.07)        | (5.13,29.92)  |
| 3        | $(p, q)$   | (0.02,0.2)  | (0.03,0.4)         | (0.04,0.6)         | (0.06,0.68)        | <b>(0.2,0.74)</b>  |               |
|          | %          | 3           | 4.5                | 14.5               | 18.6               | 59.4               | 100           |
|          | N          | 11.73       | 12.49              | 12.83              | 13.31              | 13.55              | 63.91         |
|          | (D,R)      | (0.22,2.36) | (0.36,4.99)        | (0.52,7.71)        | (0.84,9.08)        | (2.71,10.04)       | (4.64,34.19)  |
| 4        | $(p, q)$   | (0.01,0.52) | (0.01,0.62)        | (0.02,0.71)        | (0.03,0.79)        | <b>(0.03,0.86)</b> |               |
|          | %          | 11.8        | 11.2               | 11.4               | 10.2               | 55.4               | 100           |
|          | N          | 11.04       | 11.28              | 10.29              | 9.29               | 8.11               | 50.01         |
|          | (D,R)      | (0.13,5.71) | (0.16,6.98)        | (0.21,7.33)        | (0.26,7.39)        | (0.26,6.94)        | (1.01,34.35)  |
| 5        | $(p, q)$   | (0.18,0.05) | (0.22,0.2)         | <b>(0.26,0.35)</b> | (0.3,0.47)         | (0.33,0.58)        |               |
|          | %          | 10.8        | 17.9               | 25.1               | 19                 | 23.4               | 96.2          |
|          | N          | 18.45       | 17.82              | 15.56              | 11.9               | 7.32               | 71.05         |
|          | (D,R)      | (3.3,0.88)  | (3.98,3.66)        | (3.98,5.44)        | (3.66,5.63)        | (2.43,4.2)         | (17.35,19.81) |
| 6        | $(p, q)$   | (0.08,0.15) | (0.18,0.38)        | <b>(0.25,0.52)</b> | (0.3,0.59)         | (0.35,0.62)        |               |
|          | %          | 4.9         | 19                 | 30.6               | 27.3               | 18.2               | 100           |
|          | N          | 15.94       | 18.32              | 17.46              | 13.04              | 7.32               | 72.08         |
|          | (D,R)      | (1.3,2.37)  | (3.31,7.01)        | (4.39,9.17)        | (3.88,7.67)        | (2.59,4.57)        | (15.48,30.78) |
| 7        | $(p, q)$   | (0.01,0.05) | <b>(0.02,0.25)</b> | <b>(0.03,0.25)</b> | <b>(0.04,0.25)</b> | <b>(0.05,0.25)</b> |               |
|          | %          | 2.6         | 21.4               | 21.3               | 16.1               | 38.6               | 100           |
|          | N          | 11.16       | 11.81              | 11.57              | 9.61               | 7.13               | 51.28         |
|          | (D,R)      | (0.13,0.62) | (0.23,2.98)        | (0.31,2.9)         | (0.38,2.4)         | (0.34,1.79)        | (1.39,10.68)  |
| 8        | $(p, q)$   | (0.01,0.05) | (0.02,0.25)        | <b>(0.03,0.4)</b>  | <b>(0.04,0.4)</b>  | <b>(0.05,0.4)</b>  |               |
|          | %          | 3           | 6.1                | 23.1               | 19.1               | 48.7               | 100           |
|          | N          | 10.75       | 11.72              | 12.15              | 11.39              | 8.93               | 54.94         |
|          | (D,R)      | (0.08,0.5)  | (0.23,2.85)        | (0.37,4.95)        | (0.44,4.54)        | (0.47,3.64)        | (1.6,16.48)   |
| 9        | $(p, q)$   | (0.01,0.05) | (0.02,0.25)        | (0.03,0.4)         | <b>(0.04,0.6)</b>  | <b>(0.05,0.6)</b>  |               |
|          | %          | 2           | 7.1                | 6.2                | 21.2               | 63.5               | 100           |
|          | N          | 10.92       | 11.82              | 12.22              | 12.05              | 11.35              | 58.36         |
|          | (D,R)      | (0.1,0.55)  | (0.22,2.95)        | (0.36,4.86)        | (0.48,7.24)        | (0.6,6.77)         | (1.76,22.38)  |
| 10       | $(p, q)$   | (0.01,0.05) | <b>(0.02,0.25)</b> | (0.03,0.05)        | (0.04,0.05)        | (0.05,0.05)        |               |
|          | %          | 2.1         | 78.1               | 10.4               | 5.2                | 4.2                | 100           |
|          | N          | 11.12       | 11.82              | 10.6               | 2.38               | 1.14               | 37.06         |
|          | (D,R)      | (0.12,0.55) | (0.24,3.04)        | (0.32,0.54)        | (0.1,0.13)         | (0.06,0.05)        | (0.84,4.32)   |
| 11       | $(p, q)$   | (0.01,0.05) | (0.02,0.2)         | <b>(0.03,0.4)</b>  | (0.04,0.15)        | (0.05,0.15)        |               |
|          | %          | 5.7         | 2.3                | 70.5               | 10.7               | 10.8               | 100           |
|          | N          | 10.84       | 11.86              | 11.75              | 10.3               | 2.69               | 47.44         |
|          | (D,R)      | (0.1,0.58)  | (0.25,2.28)        | (0.35,4.63)        | (0.42,1.54)        | (0.13,0.42)        | (1.25,9.45)   |
| 12       | $(p, q)$   | (0.01,0.05) | (0.02,0.2)         | (0.03,0.3)         | <b>(0.04,0.6)</b>  | (0.05,0.3)         |               |
|          | %          | 3.9         | 8.3                | 1.6                | 71.9               | 14.3               | 100           |
|          | N          | 10.88       | 11.85              | 12.03              | 11.7               | 9.41               | 55.87         |
|          | (D,R)      | (0.1,0.53)  | (0.25,2.38)        | (0.35,3.65)        | (0.48,7.07)        | (0.45,2.75)        | (1.63,16.38)  |
| 13       | $(p, q)$   | (0.01,0.05) | (0.02,0.05)        | <b>(0.03,0.3)</b>  | (0.04,0.05)        | (0.05,0.05)        |               |
|          | %          | 23.5        | 0.9                | 62.5               | 7.1                | 6                  | 100           |
|          | N          | 10.99       | 11.22              | 9.49               | 8.21               | 1.56               | 41.47         |
|          | (D,R)      | (0.11,0.54) | (0.18,0.56)        | (0.27,2.86)        | (0.33,0.44)        | (0.07,0.07)        | (0.97,4.48)   |
| 14       | $(p, q)$   | (0.01,0.05) | (0.02,0.05)        | (0.03,0.05)        | <b>(0.04,0.3)</b>  | (0.05,0.05)        |               |
|          | %          | 23.5        | 24.7               | 0.6                | 45.6               | 5.6                | 100           |
|          | N          | 10.96       | 11.72              | 9.14               | 7.05               | 5.5                | 44.37         |
|          | (D,R)      | (0.12,0.54) | (0.26,0.6)         | (0.26,0.41)        | (0.31,2.14)        | (0.26,0.24)        | (1.19,3.93)   |
| 15       | $(p, q)$   | (0.01,0.05) | (0.02,0.05)        | (0.03,0.05)        | (0.04,0.05)        | <b>(0.05,0.3)</b>  |               |
|          | %          | 23.2        | 24.6               | 15.6               | 0.6                | 36                 | 100           |
|          | N          | 10.95       | 11.52              | 9.11               | 6.62               | 5.19               | 43.39         |
|          | (D,R)      | (0.11,0.53) | (0.23,0.62)        | (0.28,0.43)        | (0.27,0.32)        | (0.26,1.53)        | (1.15,3.43)   |

Table 6: Simulation results using the non-parametric+ model. Cohort size 10 and maximum size 20 for each dose level.  $r^{(l)} = 10$ .

| Scenario | Dose Level |             |                    |                    |                    | Total              |               |
|----------|------------|-------------|--------------------|--------------------|--------------------|--------------------|---------------|
|          | 1          | 2           | 3                  | 4                  | 5                  |                    |               |
| 1        | $(p, q)$   | (0.01,0.05) | (0.02,0.2)         | (0.03,0.35)        | (0.04,0.6)         | <b>(0.05,0.8)</b>  |               |
|          | %          | 4.3         | 6.2                | 3                  | 2.7                | 83.8               | 100           |
|          | N          | 10.07       | 10.28              | 9.83               | 9.33               | 9.12               | 48.63         |
|          | $(D, R)$   | (0.1,0.48)  | (0.2,2.03)         | (0.27,3.45)        | (0.38,5.54)        | (0.47,7.32)        | (1.42,18.81)  |
| 2        | $(p, q)$   | (0.01,0.57) | (0.03,0.58)        | (0.06,0.6)         | <b>(0.2,0.62)</b>  | (0.32,0.64)        |               |
|          | %          | 25.6        | 19                 | 17.4               | 18.5               | 19.5               | 100           |
|          | N          | 10.06       | 10.47              | 8.55               | 9.15               | 5.95               | 44.18         |
|          | $(D, R)$   | (0.09,5.84) | (0.3,5.97)         | (0.56,5.14)        | (1.87,5.61)        | (1.9,3.84)         | (4.71,26.4)   |
| 3        | $(p, q)$   | (0.02,0.2)  | (0.03,0.4)         | (0.04,0.6)         | (0.06,0.68)        | <b>(0.2,0.74)</b>  |               |
|          | %          | 4.2         | 4.8                | 14.5               | 15.4               | 61.1               | 100           |
|          | N          | 10.09       | 10.81              | 9.94               | 10.2               | 13.33              | 54.37         |
|          | $(D, R)$   | (0.2,2.02)  | (0.32,4.19)        | (0.37,5.9)         | (0.61,6.86)        | (2.69,9.89)        | (4.2,28.87)   |
| 4        | $(p, q)$   | (0.01,0.52) | (0.01,0.62)        | (0.02,0.71)        | (0.03,0.79)        | <b>(0.03,0.86)</b> |               |
|          | %          | 15.3        | 12.4               | 9.5                | 11                 | 51.8               | 100           |
|          | N          | 10.04       | 10.22              | 8.53               | 7.26               | 6.32               | 42.37         |
|          | $(D, R)$   | (0.11,5.25) | (0.12,6.32)        | (0.17,6.06)        | (0.18,5.77)        | (0.2,5.37)         | (0.78,28.78)  |
| 5        | $(p, q)$   | (0.18,0.05) | (0.22,0.2)         | <b>(0.26,0.35)</b> | (0.3,0.47)         | (0.33,0.58)        |               |
|          | %          | 5.9         | 11.5               | 18.8               | 24                 | 35.8               | 96            |
|          | N          | 17.52       | 18.02              | 16.91              | 14.27              | 9.94               | 76.66         |
|          | $(D, R)$   | (3.18,0.85) | (3.95,3.65)        | (4.42,5.97)        | (4.32,6.8)         | (3.29,5.69)        | (19.15,22.96) |
| 6        | $(p, q)$   | (0.08,0.15) | (0.18,0.38)        | <b>(0.25,0.52)</b> | (0.3,0.59)         | (0.35,0.62)        |               |
|          | %          | 2.3         | 12.4               | 25.3               | 35.2               | 24.7               | 99.9          |
|          | N          | 11.76       | 17.49              | 18.39              | 15.15              | 9.17               | 71.96         |
|          | $(D, R)$   | (0.94,1.81) | (3.08,6.59)        | (4.57,9.54)        | (4.54,8.87)        | (3.13,5.69)        | (16.27,32.49) |
| 7        | $(p, q)$   | (0.01,0.05) | <b>(0.02,0.25)</b> | <b>(0.03,0.25)</b> | <b>(0.04,0.25)</b> | <b>(0.05,0.25)</b> |               |
|          | %          | 2.5         | 21.9               | 20.4               | 14.4               | 40.8               | 100           |
|          | N          | 10.03       | 10.24              | 9.88               | 7.87               | 5.74               | 43.76         |
|          | $(D, R)$   | (0.08,0.53) | (0.19,2.54)        | (0.3,2.52)         | (0.31,1.99)        | (0.27,1.45)        | (1.16,9.03)   |
| 8        | $(p, q)$   | (0.01,0.05) | (0.02,0.25)        | <b>(0.03,0.4)</b>  | <b>(0.04,0.4)</b>  | <b>(0.05,0.4)</b>  |               |
|          | %          | 2           | 7.9                | 25.9               | 19.6               | 44.6               | 100           |
|          | N          | 10.04       | 10.35              | 9.96               | 9.36               | 6.68               | 46.39         |
|          | $(D, R)$   | (0.11,0.52) | (0.21,2.6)         | (0.29,4.03)        | (0.38,3.76)        | (0.35,2.62)        | (1.34,13.52)  |
| 9        | $(p, q)$   | (0.01,0.05) | (0.02,0.25)        | (0.03,0.4)         | <b>(0.04,0.6)</b>  | <b>(0.05,0.6)</b>  |               |
|          | %          | 2.1         | 8.6                | 4.6                | 21.4               | 63.3               | 100           |
|          | N          | 10.03       | 10.3               | 10.03              | 9.39               | 8.83               | 48.58         |
|          | $(D, R)$   | (0.1,0.47)  | (0.2,2.59)         | (0.35,3.94)        | (0.35,5.6)         | (0.45,5.36)        | (1.45,17.96)  |
| 10       | $(p, q)$   | (0.01,0.05) | <b>(0.02,0.25)</b> | (0.03,0.05)        | (0.04,0.05)        | (0.05,0.05)        |               |
|          | %          | 2.6         | 70.3               | 14.7               | 5.2                | 7.2                | 100           |
|          | N          | 10.04       | 10.32              | 9.77               | 2.78               | 1.27               | 34.18         |
|          | $(D, R)$   | (0.1,0.48)  | (0.2,2.54)         | (0.27,0.52)        | (0.1,0.13)         | (0.06,0.08)        | (0.73,3.74)   |
| 11       | $(p, q)$   | (0.01,0.05) | (0.02,0.2)         | <b>(0.03,0.4)</b>  | (0.04,0.15)        | (0.05,0.15)        |               |
|          | %          | 5.8         | 4.5                | 65.2               | 9.9                | 14.6               | 100           |
|          | N          | 10.03       | 10.34              | 9.52               | 9.1                | 2.54               | 41.53         |
|          | $(D, R)$   | (0.1,0.51)  | (0.19,1.97)        | (0.28,3.77)        | (0.34,1.38)        | (0.12,0.39)        | (1.04,8.01)   |
| 12       | $(p, q)$   | (0.01,0.05) | (0.02,0.2)         | (0.03,0.3)         | <b>(0.04,0.6)</b>  | (0.05,0.3)         |               |
|          | %          | 3.7         | 10                 | 1.8                | 65.4               | 19.1               | 100           |
|          | N          | 10.06       | 10.32              | 9.86               | 9.05               | 8.61               | 47.9          |
|          | $(D, R)$   | (0.11,0.5)  | (0.2,2.02)         | (0.31,2.95)        | (0.37,5.41)        | (0.46,2.58)        | (1.44,13.47)  |
| 13       | $(p, q)$   | (0.01,0.05) | (0.02,0.05)        | <b>(0.03,0.3)</b>  | (0.04,0.05)        | (0.05,0.05)        |               |
|          | %          | 22.3        | 1.3                | 61                 | 7.1                | 8.3                | 100           |
|          | N          | 10.03       | 10.29              | 7.91               | 7.7                | 1.6                | 37.53         |
|          | $(D, R)$   | (0.09,0.47) | (0.19,0.51)        | (0.25,2.36)        | (0.29,0.4)         | (0.08,0.09)        | (0.9,3.82)    |
| 14       | $(p, q)$   | (0.01,0.05) | (0.02,0.05)        | (0.03,0.05)        | <b>(0.04,0.3)</b>  | (0.05,0.05)        |               |
|          | %          | 24.1        | 23.8               | 1.1                | 41.3               | 9.7                | 100           |
|          | N          | 10.03       | 10.23              | 7.73               | 5.55               | 5.18               | 38.72         |
|          | $(D, R)$   | (0.1,0.49)  | (0.19,0.52)        | (0.25,0.36)        | (0.23,1.68)        | (0.25,0.28)        | (1.02,3.34)   |
| 15       | $(p, q)$   | (0.01,0.05) | (0.02,0.05)        | (0.03,0.05)        | (0.04,0.05)        | <b>(0.05,0.3)</b>  |               |
|          | %          | 22.2        | 22.2               | 16.7               | 0.5                | 38.4               | 100           |
|          | N          | 10.03       | 10.3               | 7.92               | 5.81               | 4.11               | 38.17         |
|          | $(D, R)$   | (0.1,0.47)  | (0.22,0.49)        | (0.24,0.36)        | (0.23,0.3)         | (0.2,1.16)         | (0.99,2.78)   |

Table 7: Simulation results using the parametric model. Cohort size 10 and maximum size 20 for each dose level.  $r^{(l)} = 10$ .

| Scenario | Dose Level |             |                    |                    |                    | Total              |               |
|----------|------------|-------------|--------------------|--------------------|--------------------|--------------------|---------------|
|          | 1          | 2           | 3                  | 4                  | 5                  |                    |               |
| 1        | $(p, q)$   | (0.01,0.05) | (0.02,0.2)         | (0.03,0.35)        | (0.04,0.6)         | <b>(0.05,0.8)</b>  | 100           |
|          | %          | 4.9         | 6.5                | 3.4                | 2.9                | 82.3               | 48.12         |
|          | N          | 10          | 10.27              | 9.67               | 9.21               | 8.97               | 48.12         |
|          | (D,R)      | (0.08,0.48) | (0.2,2.08)         | (0.31,3.42)        | (0.36,5.52)        | (0.45,7.15)        | (1.38,18.65)  |
| 2        | $(p, q)$   | (0.01,0.57) | (0.03,0.58)        | (0.06,0.6)         | <b>(0.2,0.62)</b>  | (0.32,0.64)        | 100           |
|          | %          | 26.4        | 17.3               | 18.9               | 21                 | 16.4               | 44.21         |
|          | N          | 10.08       | 10.54              | 8.64               | 9.21               | 5.74               | 44.21         |
|          | (D,R)      | (0.1,5.82)  | (0.34,5.97)        | (0.55,5.24)        | (1.85,5.67)        | (1.88,3.69)        | (4.71,26.4)   |
| 3        | $(p, q)$   | (0.02,0.2)  | (0.03,0.4)         | (0.04,0.6)         | (0.06,0.68)        | <b>(0.2,0.74)</b>  | 100           |
|          | %          | 3.6         | 4.7                | 14.1               | 14.1               | 63.5               | 55.54         |
|          | N          | 10.23       | 10.94              | 10.14              | 10.46              | 13.77              | 55.54         |
|          | (D,R)      | (0.23,2.02) | (0.37,4.39)        | (0.4,6.03)         | (0.62,7.06)        | (2.78,10.3)        | (4.41,29.8)   |
| 4        | $(p, q)$   | (0.01,0.52) | (0.01,0.62)        | (0.02,0.71)        | (0.03,0.79)        | <b>(0.03,0.86)</b> | 100           |
|          | %          | 13.1        | 12.3               | 9.4                | 9.4                | 55.8               | 43.02         |
|          | N          | 10.05       | 10.17              | 8.79               | 7.46               | 6.55               | 43.02         |
|          | (D,R)      | (0.1,5.29)  | (0.16,6.36)        | (0.17,6.23)        | (0.18,5.87)        | (0.18,5.6)         | (0.8,29.35)   |
| 5        | $(p, q)$   | (0.18,0.05) | (0.22,0.2)         | <b>(0.26,0.35)</b> | (0.3,0.47)         | (0.33,0.58)        | 97.1          |
|          | %          | 4.5         | 10.4               | 17.6               | 27.3               | 37.3               | 78.12         |
|          | N          | 16.24       | 18.31              | 17.54              | 15.12              | 10.91              | 78.12         |
|          | (D,R)      | (2.9,0.81)  | (4.07,3.76)        | (4.62,6.21)        | (4.46,7.13)        | (3.65,6.34)        | (19.71,24.24) |
| 6        | $(p, q)$   | (0.08,0.15) | (0.18,0.38)        | <b>(0.25,0.52)</b> | (0.3,0.59)         | (0.35,0.62)        | 100           |
|          | %          | 2.8         | 12.2               | 25                 | 36.7               | 23.3               | 71.44         |
|          | N          | 11.78       | 17.4               | 18.28              | 15.07              | 8.91               | 71.44         |
|          | (D,R)      | (0.92,1.75) | (3.19,6.64)        | (4.53,9.47)        | (4.53,8.97)        | (3.11,5.54)        | (16.28,32.38) |
| 7        | $(p, q)$   | (0.01,0.05) | <b>(0.02,0.25)</b> | <b>(0.03,0.25)</b> | <b>(0.04,0.25)</b> | <b>(0.05,0.25)</b> | 100           |
|          | %          | 2           | 21.3               | 20.8               | 15.8               | 40.1               | 44.11         |
|          | N          | 10.06       | 10.34              | 9.93               | 7.89               | 5.89               | 44.11         |
|          | (D,R)      | (0.08,0.49) | (0.21,2.64)        | (0.29,2.48)        | (0.32,2.02)        | (0.31,1.52)        | (1.22,9.15)   |
| 8        | $(p, q)$   | (0.01,0.05) | (0.02,0.25)        | <b>(0.03,0.4)</b>  | <b>(0.04,0.4)</b>  | <b>(0.05,0.4)</b>  | 100           |
|          | %          | 1.7         | 6.9                | 23.4               | 20.8               | 47.2               | 46.88         |
|          | N          | 10.05       | 10.31              | 9.99               | 9.5                | 7.03               | 46.88         |
|          | (D,R)      | (0.11,0.46) | (0.19,2.57)        | (0.28,3.99)        | (0.36,3.83)        | (0.35,2.85)        | (1.3,13.71)   |
| 9        | $(p, q)$   | (0.01,0.05) | (0.02,0.25)        | (0.03,0.4)         | <b>(0.04,0.6)</b>  | <b>(0.05,0.6)</b>  | 100           |
|          | %          | 2.4         | 6.6                | 6.3                | 21.2               | 63.5               | 48.52         |
|          | N          | 10.03       | 10.31              | 9.94               | 9.49               | 8.75               | 48.52         |
|          | (D,R)      | (0.09,0.48) | (0.21,2.55)        | (0.31,3.99)        | (0.36,5.66)        | (0.44,5.28)        | (1.42,17.96)  |
| 10       | $(p, q)$   | (0.01,0.05) | <b>(0.02,0.25)</b> | (0.03,0.05)        | (0.04,0.05)        | (0.05,0.05)        | 100           |
|          | %          | 2.8         | 74.3               | 12.1               | 5.9                | 4.9                | 33.66         |
|          | N          | 10.04       | 10.43              | 9.79               | 2.31               | 1.09               | 33.66         |
|          | (D,R)      | (0.11,0.52) | (0.22,2.65)        | (0.28,0.48)        | (0.1,0.12)         | (0.05,0.05)        | (0.76,3.82)   |
| 11       | $(p, q)$   | (0.01,0.05) | (0.02,0.2)         | <b>(0.03,0.4)</b>  | (0.04,0.15)        | (0.05,0.15)        | 100           |
|          | %          | 5.9         | 3.6                | 67.1               | 9.9                | 13.5               | 41.55         |
|          | N          | 10.04       | 10.36              | 9.56               | 9.18               | 2.41               | 41.55         |
|          | (D,R)      | (0.11,0.53) | (0.21,2.03)        | (0.3,3.88)         | (0.38,1.36)        | (0.12,0.39)        | (1.1,8.2)     |
| 12       | $(p, q)$   | (0.01,0.05) | (0.02,0.2)         | (0.03,0.3)         | <b>(0.04,0.6)</b>  | (0.05,0.3)         | 100           |
|          | %          | 5.3         | 8.8                | 1.2                | 65.2               | 19.5               | 47.49         |
|          | N          | 10.02       | 10.33              | 9.67               | 8.89               | 8.58               | 47.49         |
|          | (D,R)      | (0.1,0.5)   | (0.19,2.04)        | (0.3,2.91)         | (0.35,5.34)        | (0.42,2.52)        | (1.35,13.31)  |
| 13       | $(p, q)$   | (0.01,0.05) | (0.02,0.05)        | <b>(0.03,0.3)</b>  | (0.04,0.05)        | (0.05,0.05)        | 100           |
|          | %          | 23.2        | 1.4                | 61                 | 8.1                | 6.3                | 37.14         |
|          | N          | 10.06       | 10.23              | 7.76               | 7.59               | 1.5                | 37.14         |
|          | (D,R)      | (0.11,0.5)  | (0.19,0.51)        | (0.24,2.33)        | (0.3,0.4)          | (0.08,0.08)        | (0.91,3.82)   |
| 14       | $(p, q)$   | (0.01,0.05) | (0.02,0.05)        | (0.03,0.05)        | <b>(0.04,0.3)</b>  | (0.05,0.05)        | 100           |
|          | %          | 26.4        | 24.1               | 0.6                | 40.9               | 8                  | 37.79         |
|          | N          | 10.05       | 10.2               | 7.46               | 5.16               | 4.92               | 37.79         |
|          | (D,R)      | (0.09,0.54) | (0.21,0.49)        | (0.21,0.35)        | (0.21,1.51)        | (0.24,0.24)        | (0.96,3.13)   |
| 15       | $(p, q)$   | (0.01,0.05) | (0.02,0.05)        | (0.03,0.05)        | (0.04,0.05)        | <b>(0.05,0.3)</b>  | 100           |
|          | %          | 23.9        | 27                 | 16.4               | 0.2                | 32.5               | 36.59         |
|          | N          | 10.05       | 10.3               | 7.75               | 5.04               | 3.45               | 36.59         |
|          | (D,R)      | (0.1,0.51)  | (0.21,0.54)        | (0.24,0.37)        | (0.2,0.25)         | (0.16,1.04)        | (0.91,2.7)    |

Table 8: Simulation results using the parametric+ model. Cohort size 10 and maximum size 20 for each dose level.  $r^{(l)} = 10$ .

### 3.2 $r = 1$

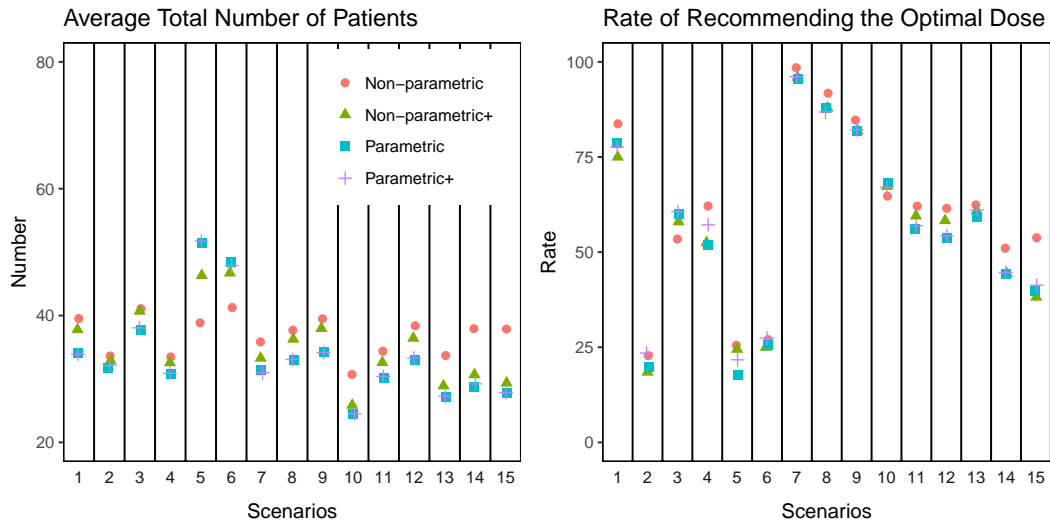

Figure 3: Average total number of patients and the average rate of reporting the optimal dose levels(s) for Scenarios 1-15.

| Scenario | Dose Level |             |                    |                    |                    | Total              |              |
|----------|------------|-------------|--------------------|--------------------|--------------------|--------------------|--------------|
|          | 1          | 2           | 3                  | 4                  | 5                  |                    |              |
| 1        | $(p, q)$   | (0.01,0.05) | (0.02,0.2)         | (0.03,0.35)        | (0.04,0.6)         | <b>(0.05,0.8)</b>  |              |
|          | %          | 2.1         | 6.3                | 3.8                | 4.1                | 83.7               | 100          |
|          | N          | 7.38        | 8.26               | 8.13               | 7.88               | 7.88               | 39.53        |
|          | $(D, R)$   | (0.06,0.34) | (0.16,1.64)        | (0.23,2.86)        | (0.31,4.75)        | (0.39,6.28)        | (1.15,15.86) |
| 2        | $(p, q)$   | (0.01,0.57) | (0.03,0.58)        | (0.06,0.6)         | <b>(0.2,0.62)</b>  | (0.32,0.64)        |              |
|          | %          | 18.8        | 18.6               | 23.7               | 22.8               | 16.1               | 100          |
|          | N          | 7.46        | 8.15               | 7.42               | 6.6                | 3.98               | 33.61        |
|          | $(D, R)$   | (0.07,4.23) | (0.26,4.75)        | (0.47,4.5)         | (1.28,4.07)        | (1.31,2.51)        | (3.39,20.06) |
| 3        | $(p, q)$   | (0.02,0.2)  | (0.03,0.4)         | (0.04,0.6)         | (0.06,0.68)        | <b>(0.2,0.74)</b>  |              |
|          | %          | 4.9         | 5.1                | 14                 | 22.6               | 53.4               | 100          |
|          | N          | 7.89        | 8.41               | 8.28               | 8.25               | 8.25               | 41.08        |
|          | $(D, R)$   | (0.15,1.6)  | (0.28,3.34)        | (0.34,5.02)        | (0.51,5.62)        | (1.66,6.1)         | (2.94,21.67) |
| 4        | $(p, q)$   | (0.01,0.52) | (0.01,0.62)        | (0.02,0.71)        | (0.03,0.79)        | <b>(0.03,0.86)</b> |              |
|          | %          | 11.7        | 12                 | 9.1                | 5.1                | 62.1               | 100          |
|          | N          | 7.46        | 7.58               | 6.75               | 6.15               | 5.53               | 33.47        |
|          | $(D, R)$   | (0.07,3.91) | (0.1,4.76)         | (0.11,4.81)        | (0.16,4.89)        | (0.17,4.79)        | (0.61,23.17) |
| 5        | $(p, q)$   | (0.18,0.05) | (0.22,0.2)         | <b>(0.26,0.35)</b> | (0.3,0.47)         | (0.33,0.58)        |              |
|          | %          | 16.9        | 22.7               | 25.5               | 12.2               | 13.7               | 91           |
|          | N          | 11.67       | 10.69              | 8.36               | 5.37               | 2.76               | 38.85        |
|          | $(D, R)$   | (2.06,0.57) | (2.41,2.14)        | (2.16,2.94)        | (1.7,2.45)         | (0.87,1.59)        | (9.2,9.7)    |
| 6        | $(p, q)$   | (0.08,0.15) | (0.18,0.38)        | <b>(0.25,0.52)</b> | (0.3,0.59)         | (0.35,0.62)        |              |
|          | %          | 12.2        | 26.5               | 27                 | 21.7               | 11.9               | 99.3         |
|          | N          | 10.02       | 11.58              | 9.77               | 6.73               | 3.18               | 41.27        |
|          | $(D, R)$   | (0.77,1.42) | (2.16,4.43)        | (2.41,5.09)        | (2.02,4.01)        | (1.12,1.98)        | (8.48,16.93) |
| 7        | $(p, q)$   | (0.01,0.05) | <b>(0.02,0.25)</b> | <b>(0.03,0.25)</b> | <b>(0.04,0.25)</b> | <b>(0.05,0.25)</b> |              |
|          | %          | 1.5         | 20.2               | 19.2               | 16.2               | 42.9               | 100          |
|          | N          | 7.46        | 8.17               | 8.31               | 6.8                | 5.12               | 35.85        |
|          | $(D, R)$   | (0.07,0.38) | (0.16,2.07)        | (0.27,2.08)        | (0.29,1.7)         | (0.25,1.24)        | (1.04,7.48)  |
| 8        | $(p, q)$   | (0.01,0.05) | (0.02,0.25)        | <b>(0.03,0.4)</b>  | <b>(0.04,0.4)</b>  | <b>(0.05,0.4)</b>  |              |
|          | %          | 1.4         | 6.8                | 22.3               | 19.4               | 50.1               | 100          |
|          | N          | 7.57        | 8.22               | 8.18               | 7.81               | 5.91               | 37.7         |
|          | $(D, R)$   | (0.09,0.38) | (0.17,2.02)        | (0.23,3.31)        | (0.35,3.13)        | (0.3,2.31)         | (1.14,11.15) |
| 9        | $(p, q)$   | (0.01,0.05) | (0.02,0.25)        | (0.03,0.4)         | <b>(0.04,0.6)</b>  | <b>(0.05,0.6)</b>  |              |
|          | %          | 1.2         | 7.7                | 6.4                | 19.6               | 65.1               | 100          |
|          | N          | 7.56        | 8.29               | 8.36               | 7.9                | 7.38               | 39.49        |
|          | $(D, R)$   | (0.09,0.39) | (0.18,2.12)        | (0.26,3.35)        | (0.32,4.7)         | (0.36,4.47)        | (1.21,15.03) |
| 10       | $(p, q)$   | (0.01,0.05) | <b>(0.02,0.25)</b> | (0.03,0.05)        | (0.04,0.05)        | (0.05,0.05)        |              |
|          | %          | 1.7         | 64.7               | 10.4               | 6.1                | 17.1               | 100          |
|          | N          | 7.5         | 8.09               | 8.88               | 3.68               | 2.58               | 30.72        |
|          | $(D, R)$   | (0.08,0.38) | (0.14,2.05)        | (0.27,0.46)        | (0.14,0.2)         | (0.12,0.12)        | (0.76,3.22)  |
| 11       | $(p, q)$   | (0.01,0.05) | (0.02,0.2)         | <b>(0.03,0.4)</b>  | (0.04,0.15)        | (0.05,0.15)        |              |
|          | %          | 1.8         | 4.2                | 62.1               | 12.9               | 19                 | 100          |
|          | N          | 7.48        | 8.44               | 8.04               | 7.44               | 2.96               | 34.37        |
|          | $(D, R)$   | (0.07,0.39) | (0.17,1.66)        | (0.22,3.26)        | (0.29,1.12)        | (0.16,0.4)         | (0.92,6.82)  |
| 12       | $(p, q)$   | (0.01,0.05) | (0.02,0.2)         | (0.03,0.3)         | <b>(0.04,0.6)</b>  | (0.05,0.3)         |              |
|          | %          | 2.2         | 10                 | 2.6                | 61.5               | 23.7               | 100          |
|          | N          | 7.51        | 8.4                | 8.2                | 7.64               | 6.64               | 38.39        |
|          | $(D, R)$   | (0.08,0.36) | (0.16,1.72)        | (0.24,2.4)         | (0.31,4.57)        | (0.36,1.95)        | (1.14,11.01) |
| 13       | $(p, q)$   | (0.01,0.05) | (0.02,0.05)        | <b>(0.03,0.3)</b>  | (0.04,0.05)        | (0.05,0.05)        |              |
|          | %          | 15.4        | 0.5                | 62.4               | 7.4                | 14.3               | 100          |
|          | N          | 7.38        | 9.43               | 7.23               | 7.2                | 2.46               | 33.69        |
|          | $(D, R)$   | (0.06,0.4)  | (0.17,0.47)        | (0.23,2.13)        | (0.28,0.36)        | (0.13,0.12)        | (0.88,3.48)  |
| 14       | $(p, q)$   | (0.01,0.05) | (0.02,0.05)        | (0.03,0.05)        | <b>(0.04,0.3)</b>  | (0.05,0.05)        |              |
|          | %          | 14.9        | 16.2               | 0.5                | 51                 | 17.4               | 100          |
|          | N          | 7.48        | 9.48               | 8.74               | 6.12               | 6.1                | 37.93        |
|          | $(D, R)$   | (0.08,0.37) | (0.18,0.47)        | (0.24,0.46)        | (0.24,1.79)        | (0.33,0.31)        | (1.07,3.4)   |
| 15       | $(p, q)$   | (0.01,0.05) | (0.02,0.05)        | (0.03,0.05)        | (0.04,0.05)        | <b>(0.05,0.3)</b>  |              |
|          | %          | 15.6        | 16.7               | 13.2               | 0.7                | 53.8               | 100          |
|          | N          | 7.35        | 9.53               | 8.64               | 7.22               | 5.14               | 37.88        |
|          | $(D, R)$   | (0.05,0.37) | (0.21,0.5)         | (0.26,0.43)        | (0.29,0.35)        | (0.27,1.53)        | (1.07,3.18)  |

Table 9: Simulation results using the non-parametric model. Cohort size 7 and maximum size 14 for each dose level.  $r^{(l)} = 1$ .

| Scenario | Dose Level |             |                    |                    |                    | Total              |               |
|----------|------------|-------------|--------------------|--------------------|--------------------|--------------------|---------------|
|          | 1          | 2           | 3                  | 4                  | 5                  |                    |               |
| 1        | $(p, q)$   | (0.01,0.05) | (0.02,0.2)         | (0.03,0.35)        | (0.04,0.6)         | <b>(0.05,0.8)</b>  |               |
|          | %          | 6.5         | 9                  | 4                  | 5.5                | 75                 | 100           |
|          | N          | 7.46        | 7.88               | 7.76               | 7.34               | 7.34               | 37.79         |
|          | $(D, R)$   | (0.07,0.4)  | (0.16,1.65)        | (0.25,2.75)        | (0.3,4.41)         | (0.38,5.81)        | (1.15,15.02)  |
| 2        | $(p, q)$   | (0.01,0.57) | (0.03,0.58)        | (0.06,0.6)         | <b>(0.2,0.62)</b>  | (0.32,0.64)        |               |
|          | %          | 21.6        | 21.5               | 19.1               | 18.5               | 19.3               | 100           |
|          | N          | 7.45        | 7.97               | 6.97               | 6.2                | 4.3                | 32.89         |
|          | $(D, R)$   | (0.07,4.33) | (0.22,4.65)        | (0.44,4.16)        | (1.26,3.81)        | (1.36,2.79)        | (3.36,19.73)  |
| 3        | $(p, q)$   | (0.02,0.2)  | (0.03,0.4)         | (0.04,0.6)         | (0.06,0.68)        | <b>(0.2,0.74)</b>  |               |
|          | %          | 6.4         | 5                  | 13.7               | 16.9               | 58                 | 100           |
|          | N          | 7.92        | 8.31               | 8.06               | 7.94               | 8.47               | 40.7          |
|          | $(D, R)$   | (0.15,1.57) | (0.26,3.33)        | (0.31,4.88)        | (0.46,5.41)        | (1.66,6.32)        | (2.83,21.52)  |
| 4        | $(p, q)$   | (0.01,0.52) | (0.01,0.62)        | (0.02,0.71)        | (0.03,0.79)        | <b>(0.03,0.86)</b> |               |
|          | %          | 12.3        | 14.2               | 11.4               | 9.6                | 52.5               | 100           |
|          | N          | 7.33        | 7.62               | 6.81               | 5.82               | 4.98               | 32.56         |
|          | $(D, R)$   | (0.05,3.78) | (0.11,4.79)        | (0.13,4.82)        | (0.14,4.63)        | (0.14,4.27)        | (0.57,22.28)  |
| 5        | $(p, q)$   | (0.18,0.05) | (0.22,0.2)         | <b>(0.26,0.35)</b> | (0.3,0.47)         | (0.33,0.58)        |               |
|          | %          | 12          | 18.4               | 24.5               | 17                 | 23.4               | 95.3          |
|          | N          | 12.17       | 11.61              | 10.12              | 7.66               | 4.77               | 46.32         |
|          | $(D, R)$   | (2.24,0.58) | (2.5,2.25)         | (2.64,3.51)        | (2.37,3.55)        | (1.56,2.78)        | (11.31,12.67) |
| 6        | $(p, q)$   | (0.08,0.15) | (0.18,0.38)        | <b>(0.25,0.52)</b> | (0.3,0.59)         | (0.35,0.62)        |               |
|          | %          | 8.5         | 18.8               | 25                 | 27.9               | 19.8               | 100           |
|          | N          | 10.05       | 11.81              | 11.06              | 8.61               | 5.19               | 46.72         |
|          | $(D, R)$   | (0.76,1.54) | (2.06,4.43)        | (2.7,5.74)         | (2.53,5.09)        | (1.83,3.2)         | (9.88,20)     |
| 7        | $(p, q)$   | (0.01,0.05) | <b>(0.02,0.25)</b> | <b>(0.03,0.25)</b> | <b>(0.04,0.25)</b> | <b>(0.05,0.25)</b> |               |
|          | %          | 4           | 22.4               | 23.3               | 15.2               | 35.1               | 100           |
|          | N          | 7.39        | 7.8                | 7.73               | 6.05               | 4.3                | 33.28         |
|          | $(D, R)$   | (0.07,0.36) | (0.14,1.92)        | (0.25,1.91)        | (0.26,1.43)        | (0.21,1.05)        | (0.92,6.68)   |
| 8        | $(p, q)$   | (0.01,0.05) | (0.02,0.25)        | <b>(0.03,0.4)</b>  | <b>(0.04,0.4)</b>  | <b>(0.05,0.4)</b>  |               |
|          | %          | 4           | 8.1                | 20.8               | 17.4               | 49.7               | 100           |
|          | N          | 7.47        | 7.91               | 7.93               | 7.31               | 5.66               | 36.28         |
|          | $(D, R)$   | (0.07,0.34) | (0.17,1.95)        | (0.24,3.09)        | (0.3,2.87)         | (0.26,2.28)        | (1.05,10.53)  |
| 9        | $(p, q)$   | (0.01,0.05) | (0.02,0.25)        | (0.03,0.4)         | <b>(0.04,0.6)</b>  | <b>(0.05,0.6)</b>  |               |
|          | %          | 3.9         | 8.9                | 5.3                | 21                 | 60.9               | 100           |
|          | N          | 7.46        | 7.9                | 7.88               | 7.74               | 7                  | 37.98         |
|          | $(D, R)$   | (0.07,0.34) | (0.16,2)           | (0.24,3.15)        | (0.34,4.69)        | (0.34,4.23)        | (1.14,14.41)  |
| 10       | $(p, q)$   | (0.01,0.05) | <b>(0.02,0.25)</b> | (0.03,0.05)        | (0.04,0.05)        | (0.05,0.05)        |               |
|          | %          | 3.5         | 67.3               | 16                 | 5.1                | 8.1                | 100           |
|          | N          | 7.47        | 7.76               | 7.18               | 2.35               | 1.11               | 25.86         |
|          | $(D, R)$   | (0.07,0.34) | (0.15,1.95)        | (0.21,0.39)        | (0.12,0.11)        | (0.07,0.05)        | (0.61,2.84)   |
| 11       | $(p, q)$   | (0.01,0.05) | (0.02,0.2)         | <b>(0.03,0.4)</b>  | (0.04,0.15)        | (0.05,0.15)        |               |
|          | %          | 6.2         | 4.7                | 59.5               | 14.5               | 15.1               | 100           |
|          | N          | 7.58        | 7.9                | 7.8                | 6.84               | 2.48               | 32.6          |
|          | $(D, R)$   | (0.09,0.35) | (0.17,1.56)        | (0.25,3.12)        | (0.3,1.02)         | (0.13,0.33)        | (0.94,6.39)   |
| 12       | $(p, q)$   | (0.01,0.05) | (0.02,0.2)         | (0.03,0.3)         | <b>(0.04,0.6)</b>  | (0.05,0.3)         |               |
|          | %          | 4.8         | 13.2               | 2                  | 58.3               | 21.7               | 100           |
|          | N          | 7.5         | 7.97               | 7.84               | 7.01               | 6.11               | 36.43         |
|          | $(D, R)$   | (0.08,0.37) | (0.17,1.65)        | (0.24,2.39)        | (0.26,4.28)        | (0.29,1.81)        | (1.04,10.49)  |
| 13       | $(p, q)$   | (0.01,0.05) | (0.02,0.05)        | <b>(0.03,0.3)</b>  | (0.04,0.05)        | (0.05,0.05)        |               |
|          | %          | 19.5        | 2.8                | 60.9               | 9.5                | 7.3                | 100           |
|          | N          | 7.52        | 7.71               | 6.61               | 5.73               | 1.36               | 28.92         |
|          | $(D, R)$   | (0.08,0.35) | (0.16,0.41)        | (0.2,1.97)         | (0.21,0.3)         | (0.08,0.07)        | (0.72,3.1)    |
| 14       | $(p, q)$   | (0.01,0.05) | (0.02,0.05)        | (0.03,0.05)        | <b>(0.04,0.3)</b>  | (0.05,0.05)        |               |
|          | %          | 22.2        | 19.7               | 1.3                | 44.3               | 12.5               | 100           |
|          | N          | 7.43        | 7.63               | 6.24               | 5.05               | 4.31               | 30.67         |
|          | $(D, R)$   | (0.07,0.38) | (0.13,0.36)        | (0.19,0.28)        | (0.21,1.49)        | (0.21,0.23)        | (0.81,2.73)   |
| 15       | $(p, q)$   | (0.01,0.05) | (0.02,0.05)        | (0.03,0.05)        | (0.04,0.05)        | <b>(0.05,0.3)</b>  |               |
|          | %          | 23.4        | 22.3               | 14.3               | 1.8                | 38.2               | 100           |
|          | N          | 7.42        | 7.72               | 6.12               | 4.48               | 3.63               | 29.37         |
|          | $(D, R)$   | (0.07,0.39) | (0.15,0.43)        | (0.18,0.32)        | (0.18,0.25)        | (0.19,1.13)        | (0.78,2.52)   |

Table 10: Simulation results using the non-parametric+ model. Cohort size 7 and maximum size 14 for each dose level.  $r^{(l)} = 1$ .

| Scenario | Dose Level |             |                    |                    |                    | Total              |               |
|----------|------------|-------------|--------------------|--------------------|--------------------|--------------------|---------------|
|          | 1          | 2           | 3                  | 4                  | 5                  |                    |               |
| 1        | $(p, q)$   | (0.01,0.05) | (0.02,0.2)         | (0.03,0.35)        | (0.04,0.6)         | <b>(0.05,0.8)</b>  |               |
|          | %          | 6.3         | 7.1                | 3.2                | 4.7                | 78.7               | 100           |
|          | N          | 7.5         | 7.19               | 6.85               | 6.29               | 6.29               | 34.12         |
|          | (D,R)      | (0.08,0.36) | (0.15,1.39)        | (0.21,2.4)         | (0.25,3.83)        | (0.33,4.99)        | (1.02,12.96)  |
| 2        | $(p, q)$   | (0.01,0.57) | (0.03,0.58)        | (0.06,0.6)         | <b>(0.2,0.62)</b>  | (0.32,0.64)        |               |
|          | %          | 19.6        | 22.9               | 16.6               | 19.9               | 21                 | 100           |
|          | N          | 7.48        | 7.18               | 6.26               | 6.19               | 4.58               | 31.69         |
|          | (D,R)      | (0.07,4.21) | (0.21,4.22)        | (0.36,3.73)        | (1.22,3.9)         | (1.47,2.93)        | (3.33,18.99)  |
| 3        | $(p, q)$   | (0.02,0.2)  | (0.03,0.4)         | (0.04,0.6)         | (0.06,0.68)        | <b>(0.2,0.74)</b>  |               |
|          | %          | 5.5         | 6.5                | 12.8               | 15.1               | 60.1               | 100           |
|          | N          | 7.79        | 7.41               | 7.11               | 6.77               | 8.69               | 37.77         |
|          | (D,R)      | (0.14,1.54) | (0.22,3.02)        | (0.29,4.25)        | (0.41,4.65)        | (1.74,6.47)        | (2.8,19.93)   |
| 4        | $(p, q)$   | (0.01,0.52) | (0.01,0.62)        | (0.02,0.71)        | (0.03,0.79)        | <b>(0.03,0.86)</b> |               |
|          | %          | 12.4        | 12.9               | 12                 | 10.9               | 51.8               | 100           |
|          | N          | 7.56        | 7.15               | 6.24               | 5.3                | 4.47               | 30.72         |
|          | (D,R)      | (0.09,3.96) | (0.12,4.43)        | (0.12,4.42)        | (0.12,4.16)        | (0.16,3.83)        | (0.6,20.8)    |
| 5        | $(p, q)$   | (0.18,0.05) | (0.22,0.2)         | <b>(0.26,0.35)</b> | (0.3,0.47)         | (0.33,0.58)        |               |
|          | %          | 8.6         | 13.9               | 17.8               | 20.7               | 35.4               | 96.4          |
|          | N          | 12.06       | 12.03              | 11.36              | 9.25               | 6.69               | 51.39         |
|          | (D,R)      | (2.13,0.63) | (2.68,2.42)        | (2.92,3.9)         | (2.87,4.44)        | (2.16,3.85)        | (12.77,15.24) |
| 6        | $(p, q)$   | (0.08,0.15) | (0.18,0.38)        | <b>(0.25,0.52)</b> | (0.3,0.59)         | (0.35,0.62)        |               |
|          | %          | 4.3         | 16.7               | 25.6               | 29.6               | 23.6               | 99.8          |
|          | N          | 10.07       | 11.14              | 11.83              | 9.58               | 5.78               | 48.4          |
|          | (D,R)      | (0.8,1.45)  | (2.03,4.29)        | (3.01,6.07)        | (2.88,5.68)        | (2.02,3.62)        | (10.74,21.12) |
| 7        | $(p, q)$   | (0.01,0.05) | <b>(0.02,0.25)</b> | <b>(0.03,0.25)</b> | <b>(0.04,0.25)</b> | <b>(0.05,0.25)</b> |               |
|          | %          | 4.5         | 20.4               | 18.6               | 16.4               | 40.1               | 100           |
|          | N          | 7.55        | 7.17               | 6.94               | 5.45               | 4.23               | 31.34         |
|          | (D,R)      | (0.08,0.37) | (0.14,1.72)        | (0.21,1.72)        | (0.2,1.37)         | (0.22,1.03)        | (0.86,6.21)   |
| 8        | $(p, q)$   | (0.01,0.05) | (0.02,0.25)        | <b>(0.03,0.4)</b>  | <b>(0.04,0.4)</b>  | <b>(0.05,0.4)</b>  |               |
|          | %          | 4.3         | 7.7                | 19.8               | 20.2               | 48                 | 100           |
|          | N          | 7.48        | 7.2                | 6.99               | 6.34               | 5.02               | 33.03         |
|          | (D,R)      | (0.08,0.41) | (0.16,1.82)        | (0.2,2.85)         | (0.26,2.6)         | (0.25,1.99)        | (0.95,9.68)   |
| 9        | $(p, q)$   | (0.01,0.05) | (0.02,0.25)        | (0.03,0.4)         | <b>(0.04,0.6)</b>  | <b>(0.05,0.6)</b>  |               |
|          | %          | 4.1         | 8.8                | 5.3                | 17.2               | 64.6               | 100           |
|          | N          | 7.41        | 7.17               | 7.15               | 6.38               | 6.08               | 34.19         |
|          | (D,R)      | (0.07,0.4)  | (0.16,1.83)        | (0.22,2.83)        | (0.26,3.83)        | (0.28,3.68)        | (0.98,12.58)  |
| 10       | $(p, q)$   | (0.01,0.05) | <b>(0.02,0.25)</b> | (0.03,0.05)        | (0.04,0.05)        | (0.05,0.05)        |               |
|          | %          | 3.1         | 68                 | 16.6               | 5.5                | 6.8                | 100           |
|          | N          | 7.39        | 7.18               | 6.87               | 2.1                | 0.92               | 24.47         |
|          | (D,R)      | (0.06,0.33) | (0.17,1.83)        | (0.2,0.36)         | (0.08,0.11)        | (0.05,0.05)        | (0.56,2.68)   |
| 11       | $(p, q)$   | (0.01,0.05) | (0.02,0.2)         | <b>(0.03,0.4)</b>  | (0.04,0.15)        | (0.05,0.15)        |               |
|          | %          | 6.2         | 4.5                | 56                 | 12.5               | 20.8               | 100           |
|          | N          | 7.43        | 7.1                | 6.82               | 6.33               | 2.4                | 30.08         |
|          | (D,R)      | (0.06,0.37) | (0.14,1.36)        | (0.2,2.72)         | (0.25,0.96)        | (0.11,0.36)        | (0.77,5.77)   |
| 12       | $(p, q)$   | (0.01,0.05) | (0.02,0.2)         | (0.03,0.3)         | <b>(0.04,0.6)</b>  | (0.05,0.3)         |               |
|          | %          | 6.2         | 13                 | 1.9                | 53.7               | 25.2               | 100           |
|          | N          | 7.52        | 7.11               | 6.88               | 5.87               | 5.63               | 33            |
|          | (D,R)      | (0.08,0.39) | (0.13,1.45)        | (0.23,2.06)        | (0.25,3.48)        | (0.28,1.67)        | (0.97,9.05)   |
| 13       | $(p, q)$   | (0.01,0.05) | (0.02,0.05)        | <b>(0.03,0.3)</b>  | (0.04,0.05)        | (0.05,0.05)        |               |
|          | %          | 20.5        | 2.1                | 59.3               | 10.1               | 8                  | 100           |
|          | N          | 7.41        | 7.13               | 5.91               | 5.47               | 1.29               | 27.22         |
|          | (D,R)      | (0.07,0.34) | (0.16,0.33)        | (0.18,1.77)        | (0.22,0.25)        | (0.07,0.06)        | (0.7,2.75)    |
| 14       | $(p, q)$   | (0.01,0.05) | (0.02,0.05)        | (0.03,0.05)        | <b>(0.04,0.3)</b>  | (0.05,0.05)        |               |
|          | %          | 20.9        | 20.2               | 1.6                | 44.3               | 13                 | 100           |
|          | N          | 7.43        | 7.13               | 5.7                | 4.28               | 4.11               | 28.66         |
|          | (D,R)      | (0.07,0.38) | (0.15,0.38)        | (0.16,0.29)        | (0.18,1.26)        | (0.23,0.18)        | (0.78,2.5)    |
| 15       | $(p, q)$   | (0.01,0.05) | (0.02,0.05)        | (0.03,0.05)        | (0.04,0.05)        | <b>(0.05,0.3)</b>  |               |
|          | %          | 19.1        | 20.9               | 18.9               | 1.2                | 39.9               | 100           |
|          | N          | 7.4         | 7.08               | 5.89               | 4.35               | 3.13               | 27.85         |
|          | (D,R)      | (0.06,0.38) | (0.12,0.39)        | (0.17,0.34)        | (0.18,0.22)        | (0.16,0.94)        | (0.7,2.27)    |

Table 11: Simulation results using the parametric model. Cohort size 7 and maximum size 14 for each dose level.  $r^{(l)} = 1$ .



| Scenario | Dose Level |             |                    |                    |                    | Total              |               |
|----------|------------|-------------|--------------------|--------------------|--------------------|--------------------|---------------|
|          | 1          | 2           | 3                  | 4                  | 5                  |                    |               |
| 1        | $(p, q)$   | (0.01,0.05) | (0.02,0.2)         | (0.03,0.35)        | (0.04,0.6)         | <b>(0.05,0.8)</b>  | 100           |
|          | %          | 7.2         | 7.8                | 3.4                | 3.9                | 77.7               | 33.89         |
|          | N          | 7.53        | 7.14               | 6.85               | 6.24               | 6.14               | 33.89         |
|          | $(D, R)$   | (0.08,0.39) | (0.14,1.4)         | (0.2,2.39)         | (0.26,3.77)        | (0.31,4.92)        | (1,12.86)     |
| 2        | $(p, q)$   | (0.01,0.57) | (0.03,0.58)        | (0.06,0.6)         | <b>(0.2,0.62)</b>  | (0.32,0.64)        | 100           |
|          | %          | 20.5        | 18.6               | 18.9               | 23.5               | 18.5               | 32.15         |
|          | N          | 7.43        | 7.17               | 6.38               | 6.69               | 4.49               | 32.15         |
|          | $(D, R)$   | (0.07,4.21) | (0.2,4.1)          | (0.45,3.84)        | (1.36,4.16)        | (1.43,2.83)        | (3.52,19.13)  |
| 3        | $(p, q)$   | (0.02,0.2)  | (0.03,0.4)         | (0.04,0.6)         | (0.06,0.68)        | <b>(0.2,0.74)</b>  | 100           |
|          | %          | 4.7         | 6.7                | 13.5               | 14.5               | 60.6               | 38.06         |
|          | N          | 7.79        | 7.39               | 7.2                | 6.96               | 8.71               | 38.06         |
|          | $(D, R)$   | (0.14,1.55) | (0.22,2.9)         | (0.28,4.3)         | (0.4,4.71)         | (1.7,6.48)         | (2.75,19.95)  |
| 4        | $(p, q)$   | (0.01,0.52) | (0.01,0.62)        | (0.02,0.71)        | (0.03,0.79)        | <b>(0.03,0.86)</b> | 100           |
|          | %          | 11.8        | 12.2               | 10.7               | 8.1                | 57.2               | 30.88         |
|          | N          | 7.48        | 7.07               | 6.33               | 5.4                | 4.61               | 30.88         |
|          | $(D, R)$   | (0.07,3.86) | (0.1,4.37)         | (0.14,4.47)        | (0.12,4.16)        | (0.15,4)           | (0.58,20.86)  |
| 5        | $(p, q)$   | (0.18,0.05) | (0.22,0.2)         | <b>(0.26,0.35)</b> | (0.3,0.47)         | (0.33,0.58)        | 95.8          |
|          | %          | 8           | 11.8               | 21.7               | 19.6               | 34.7               | 51.76         |
|          | N          | 12.17       | 12.17              | 11.47              | 9.38               | 6.57               | 51.76         |
|          | $(D, R)$   | (2.24,0.63) | (2.67,2.42)        | (2.97,4.11)        | (2.84,4.34)        | (2.19,3.77)        | (12.9,15.27)  |
| 6        | $(p, q)$   | (0.08,0.15) | (0.18,0.38)        | <b>(0.25,0.52)</b> | (0.3,0.59)         | (0.35,0.62)        | 100           |
|          | %          | 6.1         | 15.3               | 27.4               | 29                 | 22.2               | 47.89         |
|          | N          | 10.07       | 11.21              | 11.73              | 9.4                | 5.47               | 47.89         |
|          | $(D, R)$   | (0.81,1.54) | (1.99,4.28)        | (2.91,6.05)        | (2.84,5.56)        | (1.92,3.33)        | (10.46,20.76) |
| 7        | $(p, q)$   | (0.01,0.05) | <b>(0.02,0.25)</b> | <b>(0.03,0.25)</b> | <b>(0.04,0.25)</b> | <b>(0.05,0.25)</b> | 100           |
|          | %          | 3.9         | 20.8               | 20.2               | 15.4               | 39.7               | 30.99         |
|          | N          | 7.41        | 7.13               | 7                  | 5.37               | 4.07               | 30.99         |
|          | $(D, R)$   | (0.07,0.38) | (0.14,1.75)        | (0.21,1.78)        | (0.23,1.33)        | (0.21,0.99)        | (0.86,6.23)   |
| 8        | $(p, q)$   | (0.01,0.05) | (0.02,0.25)        | <b>(0.03,0.4)</b>  | <b>(0.04,0.4)</b>  | <b>(0.05,0.4)</b>  | 100           |
|          | %          | 4.3         | 8.9                | 19.9               | 18                 | 48.9               | 33.07         |
|          | N          | 7.46        | 7.16               | 7.13               | 6.26               | 5.06               | 33.07         |
|          | $(D, R)$   | (0.07,0.38) | (0.17,1.8)         | (0.23,2.83)        | (0.27,2.5)         | (0.27,2.03)        | (1.01,9.54)   |
| 9        | $(p, q)$   | (0.01,0.05) | (0.02,0.25)        | (0.03,0.4)         | <b>(0.04,0.6)</b>  | <b>(0.05,0.6)</b>  | 100           |
|          | %          | 4.6         | 7.1                | 6.1                | 19.3               | 62.9               | 34.17         |
|          | N          | 7.51        | 7.11               | 7.01               | 6.42               | 6.12               | 34.17         |
|          | $(D, R)$   | (0.08,0.4)  | (0.11,1.72)        | (0.22,2.76)        | (0.26,3.8)         | (0.29,3.66)        | (0.95,12.34)  |
| 10       | $(p, q)$   | (0.01,0.05) | <b>(0.02,0.25)</b> | (0.03,0.05)        | (0.04,0.05)        | (0.05,0.05)        | 100           |
|          | %          | 5.1         | 67                 | 13.7               | 7.2                | 7                  | 24.5          |
|          | N          | 7.55        | 7.13               | 6.76               | 2.01               | 1.06               | 24.5          |
|          | $(D, R)$   | (0.08,0.4)  | (0.12,1.8)         | (0.18,0.34)        | (0.09,0.12)        | (0.06,0.05)        | (0.54,2.72)   |
| 11       | $(p, q)$   | (0.01,0.05) | (0.02,0.2)         | <b>(0.03,0.4)</b>  | (0.04,0.15)        | (0.05,0.15)        | 100           |
|          | %          | 5.5         | 4.9                | 56.9               | 14.5               | 18.2               | 30.39         |
|          | N          | 7.53        | 7.15               | 6.99               | 6.33               | 2.39               | 30.39         |
|          | $(D, R)$   | (0.08,0.38) | (0.15,1.45)        | (0.21,2.78)        | (0.25,0.97)        | (0.11,0.33)        | (0.8,5.92)    |
| 12       | $(p, q)$   | (0.01,0.05) | (0.02,0.2)         | (0.03,0.3)         | <b>(0.04,0.6)</b>  | (0.05,0.3)         | 100           |
|          | %          | 6.1         | 12.1               | 1.7                | 54.3               | 25.8               | 33.3          |
|          | N          | 7.54        | 7.2                | 6.86               | 5.96               | 5.75               | 33.3          |
|          | $(D, R)$   | (0.09,0.41) | (0.15,1.43)        | (0.21,2.04)        | (0.25,3.67)        | (0.28,1.69)        | (0.97,9.25)   |
| 13       | $(p, q)$   | (0.01,0.05) | (0.02,0.05)        | <b>(0.03,0.3)</b>  | (0.04,0.05)        | (0.05,0.05)        | 100           |
|          | %          | 18.8        | 2.6                | 61.1               | 10.9               | 6.6                | 27.27         |
|          | N          | 7.39        | 7.12               | 5.97               | 5.52               | 1.26               | 27.27         |
|          | $(D, R)$   | (0.06,0.35) | (0.14,0.39)        | (0.2,1.79)         | (0.22,0.27)        | (0.06,0.06)        | (0.68,2.86)   |
| 14       | $(p, q)$   | (0.01,0.05) | (0.02,0.05)        | (0.03,0.05)        | <b>(0.04,0.3)</b>  | (0.05,0.05)        | 100           |
|          | %          | 18.3        | 20.6               | 3.2                | 44.6               | 13.3               | 29.24         |
|          | N          | 7.51        | 7.13               | 5.99               | 4.45               | 4.17               | 29.24         |
|          | $(D, R)$   | (0.08,0.34) | (0.14,0.36)        | (0.2,0.33)         | (0.18,1.36)        | (0.21,0.24)        | (0.81,2.63)   |
| 15       | $(p, q)$   | (0.01,0.05) | (0.02,0.05)        | (0.03,0.05)        | (0.04,0.05)        | <b>(0.05,0.3)</b>  | 100           |
|          | %          | 21.5        | 19.2               | 17.2               | 0.8                | 41.3               | 27.84         |
|          | N          | 7.47        | 7.13               | 5.74               | 4.3                | 3.2                | 27.84         |
|          | $(D, R)$   | (0.07,0.38) | (0.14,0.34)        | (0.18,0.3)         | (0.17,0.2)         | (0.16,0.97)        | (0.71,2.19)   |

Table 12: Simulation results using the parametric+ model. Cohort size 7 and maximum size 14 for each dose level.  $r^{(l)} = 1$ .

### 3.3 $\tau$ misspecified

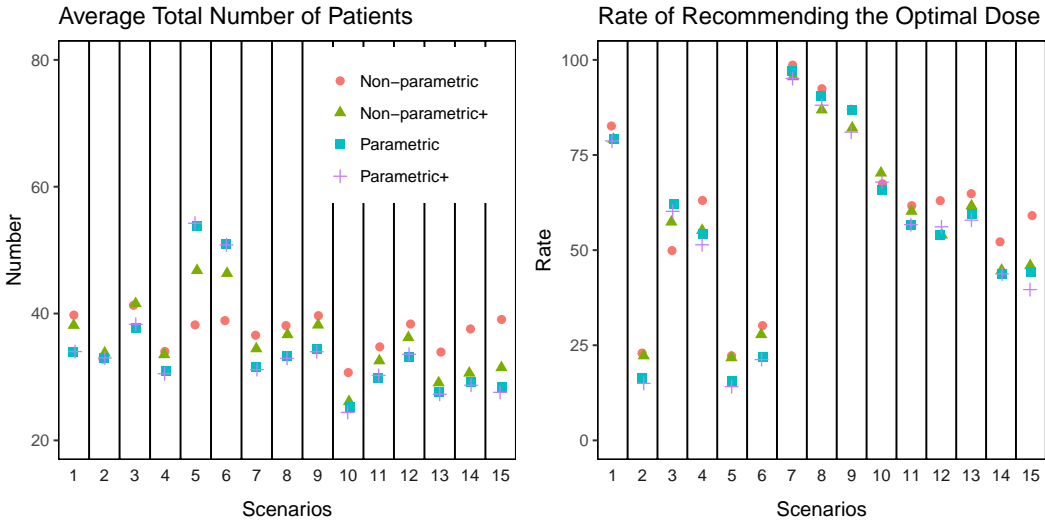

Figure 4: Average total number of patients and the average rate of reporting the optimal dose levels(s) for Scenarios 1-15.

| Scenario | Dose Level |             |                    |                    |                    | Total              |              |
|----------|------------|-------------|--------------------|--------------------|--------------------|--------------------|--------------|
|          | 1          | 2           | 3                  | 4                  | 5                  |                    |              |
| 1        | $(p, q)$   | (0.01,0.05) | (0.02,0.2)         | (0.03,0.35)        | (0.04,0.6)         | <b>(0.05,0.8)</b>  |              |
|          | %          | 3.4         | 5.6                | 4                  | 4.4                | 82.6               | 100          |
|          | N          | 7.45        | 8.48               | 8.05               | 8.04               | 7.74               | 39.75        |
|          | $(D, R)$   | (0.07,0.38) | (0.2,1.69)         | (0.19,2.81)        | (0.34,4.84)        | (0.37,6.21)        | (1.17,15.93) |
| 2        | $(p, q)$   | (0.01,0.57) | (0.03,0.58)        | (0.06,0.6)         | <b>(0.2,0.62)</b>  | (0.32,0.64)        |              |
|          | %          | 20          | 21.1               | 21.9               | 22.9               | 14.1               | 100          |
|          | N          | 7.43        | 8.23               | 7.15               | 6.31               | 3.69               | 32.82        |
|          | $(D, R)$   | (0.07,4.17) | (0.25,4.81)        | (0.41,4.23)        | (1.3,3.95)         | (1.13,2.34)        | (3.16,19.49) |
| 3        | $(p, q)$   | (0.02,0.2)  | (0.03,0.4)         | (0.04,0.6)         | (0.06,0.68)        | <b>(0.2,0.74)</b>  |              |
|          | %          | 3.9         | 5.5                | 14.2               | 26.5               | 49.9               | 100          |
|          | N          | 7.85        | 8.38               | 8.45               | 8.33               | 8.29               | 41.3         |
|          | $(D, R)$   | (0.14,1.54) | (0.25,3.4)         | (0.34,5.18)        | (0.53,5.68)        | (1.7,6.07)         | (2.96,21.86) |
| 4        | $(p, q)$   | (0.01,0.52) | (0.01,0.62)        | (0.02,0.71)        | (0.03,0.79)        | <b>(0.03,0.86)</b> |              |
|          | %          | 11.3        | 9.9                | 8.7                | 7                  | 63.1               | 100          |
|          | N          | 7.47        | 7.64               | 6.97               | 6.22               | 5.72               | 34.01        |
|          | $(D, R)$   | (0.07,3.88) | (0.11,4.68)        | (0.15,4.95)        | (0.15,4.94)        | (0.17,4.92)        | (0.65,23.36) |
| 5        | $(p, q)$   | (0.18,0.05) | (0.22,0.2)         | <b>(0.26,0.35)</b> | (0.3,0.47)         | (0.33,0.58)        |              |
|          | %          | 13.9        | 26.2               | 22.2               | 16.1               | 9.3                | 87.7         |
|          | N          | 11.44       | 10.68              | 8.37               | 5.14               | 2.58               | 38.21        |
|          | $(D, R)$   | (2.13,0.58) | (2.3,2.13)         | (2.18,2.93)        | (1.55,2.42)        | (0.88,1.53)        | (9.04,9.58)  |
| 6        | $(p, q)$   | (0.08,0.15) | (0.18,0.38)        | <b>(0.25,0.52)</b> | (0.3,0.59)         | (0.35,0.62)        |              |
|          | %          | 13          | 30.6               | 30.2               | 16.2               | 8.8                | 98.8         |
|          | N          | 9.82        | 11.52              | 9.46               | 5.68               | 2.41               | 38.88        |
|          | $(D, R)$   | (0.79,1.5)  | (2.11,4.36)        | (2.41,4.95)        | (1.75,3.41)        | (0.83,1.53)        | (7.89,15.75) |
| 7        | $(p, q)$   | (0.01,0.05) | <b>(0.02,0.25)</b> | <b>(0.03,0.25)</b> | <b>(0.04,0.25)</b> | <b>(0.05,0.25)</b> |              |
|          | %          | 1.4         | 18.3               | 19.7               | 16                 | 44.6               | 100          |
|          | N          | 7.49        | 8.14               | 8.51               | 7.07               | 5.37               | 36.58        |
|          | $(D, R)$   | (0.08,0.34) | (0.15,1.98)        | (0.28,2.14)        | (0.29,1.75)        | (0.25,1.33)        | (1.03,7.54)  |
| 8        | $(p, q)$   | (0.01,0.05) | (0.02,0.25)        | <b>(0.03,0.4)</b>  | <b>(0.04,0.4)</b>  | <b>(0.05,0.4)</b>  |              |
|          | %          | 1.4         | 6.2                | 22.5               | 18.6               | 51.3               | 100          |
|          | N          | 7.53        | 8.3                | 8.28               | 7.92               | 6.07               | 38.1         |
|          | $(D, R)$   | (0.09,0.37) | (0.17,2.06)        | (0.25,3.27)        | (0.32,3.16)        | (0.3,2.48)         | (1.13,11.34) |
| 9        | $(p, q)$   | (0.01,0.05) | (0.02,0.25)        | (0.03,0.4)         | <b>(0.04,0.6)</b>  | <b>(0.05,0.6)</b>  |              |
|          | %          | 1.5         | 6.7                | 4.8                | 18.6               | 68.4               | 100          |
|          | N          | 7.59        | 8.31               | 8.25               | 7.96               | 7.55               | 39.66        |
|          | $(D, R)$   | (0.1,0.37)  | (0.18,2.04)        | (0.26,3.3)         | (0.32,4.77)        | (0.35,4.59)        | (1.2,15.07)  |
| 10       | $(p, q)$   | (0.01,0.05) | <b>(0.02,0.25)</b> | (0.03,0.05)        | (0.04,0.05)        | (0.05,0.05)        |              |
|          | %          | 1.1         | 67.4               | 9.9                | 4.1                | 17.5               | 100          |
|          | N          | 7.52        | 8.14               | 8.97               | 3.58               | 2.48               | 30.7         |
|          | $(D, R)$   | (0.08,0.37) | (0.15,2.1)         | (0.28,0.44)        | (0.16,0.17)        | (0.12,0.12)        | (0.8,3.2)    |
| 11       | $(p, q)$   | (0.01,0.05) | (0.02,0.2)         | <b>(0.03,0.4)</b>  | (0.04,0.15)        | (0.05,0.15)        |              |
|          | %          | 2.2         | 4.2                | 61.7               | 9.7                | 22.1               | 99.9         |
|          | N          | 7.43        | 8.53               | 8.24               | 7.45               | 3.09               | 34.75        |
|          | $(D, R)$   | (0.07,0.35) | (0.18,1.75)        | (0.25,3.31)        | (0.3,1.14)         | (0.16,0.48)        | (0.97,7.03)  |
| 12       | $(p, q)$   | (0.01,0.05) | (0.02,0.2)         | (0.03,0.3)         | <b>(0.04,0.6)</b>  | (0.05,0.3)         |              |
|          | %          | 2.1         | 9.9                | 2.7                | 63                 | 22.3               | 100          |
|          | N          | 7.42        | 8.45               | 8.2                | 7.61               | 6.67               | 38.35        |
|          | $(D, R)$   | (0.06,0.34) | (0.16,1.76)        | (0.23,2.46)        | (0.3,4.61)         | (0.32,1.97)        | (1.07,11.15) |
| 13       | $(p, q)$   | (0.01,0.05) | (0.02,0.05)        | <b>(0.03,0.3)</b>  | (0.04,0.05)        | (0.05,0.05)        |              |
|          | %          | 13.9        | 1.6                | 64.8               | 7.9                | 11.8               | 100          |
|          | N          | 7.48        | 9.57               | 7.3                | 7.25               | 2.32               | 33.92        |
|          | $(D, R)$   | (0.07,0.36) | (0.19,0.48)        | (0.2,2.25)         | (0.29,0.35)        | (0.1,0.1)          | (0.85,3.55)  |
| 14       | $(p, q)$   | (0.01,0.05) | (0.02,0.05)        | (0.03,0.05)        | <b>(0.04,0.3)</b>  | (0.05,0.05)        |              |
|          | %          | 15.6        | 16.3               | 0.5                | 52.2               | 15.4               | 100          |
|          | N          | 7.41        | 9.59               | 8.68               | 6.15               | 5.75               | 37.58        |
|          | $(D, R)$   | (0.06,0.37) | (0.18,0.5)         | (0.25,0.41)        | (0.26,1.95)        | (0.26,0.31)        | (1.02,3.54)  |
| 15       | $(p, q)$   | (0.01,0.05) | (0.02,0.05)        | (0.03,0.05)        | (0.04,0.05)        | <b>(0.05,0.3)</b>  |              |
|          | %          | 13.3        | 14.5               | 12.5               | 0.6                | 59.1               | 100          |
|          | N          | 7.41        | 9.65               | 8.86               | 7.61               | 5.54               | 39.06        |
|          | $(D, R)$   | (0.06,0.35) | (0.21,0.45)        | (0.27,0.43)        | (0.29,0.38)        | (0.27,1.6)         | (1.1,3.21)   |

Table 13: Simulation results using the non-parametric model. Cohort size 7 and maximum size 14 for each dose level.  $r^{(l)} = 10$ .  $\tau^{(l)}$ s are misspecified as half of the true DLT risk.

| Scenario | Dose Level |             |                    |                    |                    | Total              |               |
|----------|------------|-------------|--------------------|--------------------|--------------------|--------------------|---------------|
|          | 1          | 2           | 3                  | 4                  | 5                  |                    |               |
| 1        | $(p, q)$   | (0.01,0.05) | (0.02,0.2)         | (0.03,0.35)        | (0.04,0.6)         | <b>(0.05,0.8)</b>  |               |
|          | %          | 5.6         | 7.6                | 3.6                | 4.1                | 79.1               | 100           |
|          | N          | 7.44        | 7.94               | 7.69               | 7.62               | 7.46               | 38.15         |
|          | (D,R)      | (0.07,0.4)  | (0.17,1.61)        | (0.22,2.68)        | (0.32,4.56)        | (0.37,5.97)        | (1.15,15.22)  |
| 2        | $(p, q)$   | (0.01,0.57) | (0.03,0.58)        | (0.06,0.6)         | <b>(0.2,0.62)</b>  | (0.32,0.64)        |               |
|          | %          | 20.2        | 19.1               | 21.1               | 22.2               | 17.4               | 100           |
|          | N          | 7.52        | 7.97               | 7.28               | 6.72               | 4.3                | 33.78         |
|          | (D,R)      | (0.08,4.28) | (0.21,4.68)        | (0.46,4.4)         | (1.35,4.19)        | (1.38,2.73)        | (3.48,20.29)  |
| 3        | $(p, q)$   | (0.02,0.2)  | (0.03,0.4)         | (0.04,0.6)         | (0.06,0.68)        | <b>(0.2,0.74)</b>  |               |
|          | %          | 5.3         | 5.7                | 13.2               | 18.4               | 57.4               | 100           |
|          | N          | 8.02        | 8.25               | 8.22               | 8.3                | 8.79               | 41.58         |
|          | (D,R)      | (0.18,1.6)  | (0.23,3.35)        | (0.31,4.99)        | (0.53,5.66)        | (1.78,6.48)        | (3.03,22.08)  |
| 4        | $(p, q)$   | (0.01,0.52) | (0.01,0.62)        | (0.02,0.71)        | (0.03,0.79)        | <b>(0.03,0.86)</b> |               |
|          | %          | 11.8        | 11.9               | 10                 | 11.1               | 55.2               | 100           |
|          | N          | 7.62        | 7.63               | 6.73               | 6.1                | 5.44               | 33.52         |
|          | (D,R)      | (0.09,3.97) | (0.1,4.75)         | (0.11,4.76)        | (0.15,4.82)        | (0.16,4.66)        | (0.61,22.96)  |
| 5        | $(p, q)$   | (0.18,0.05) | (0.22,0.2)         | <b>(0.26,0.35)</b> | (0.3,0.47)         | (0.33,0.58)        |               |
|          | %          | 12.3        | 21.6               | 21.7               | 18.4               | 22.2               | 96.2          |
|          | N          | 12.14       | 11.92              | 10.26              | 7.66               | 4.82               | 46.8          |
|          | (D,R)      | (2.18,0.61) | (2.64,2.39)        | (2.7,3.61)         | (2.29,3.55)        | (1.63,2.8)         | (11.45,12.97) |
| 6        | $(p, q)$   | (0.08,0.15) | (0.18,0.38)        | <b>(0.25,0.52)</b> | (0.3,0.59)         | (0.35,0.62)        |               |
|          | %          | 6.9         | 22                 | 27.8               | 22.2               | 20.9               | 99.8          |
|          | N          | 9.84        | 11.94              | 11.42              | 8.18               | 4.96               | 46.33         |
|          | (D,R)      | (0.75,1.46) | (2.16,4.6)         | (2.87,5.98)        | (2.41,4.8)         | (1.69,3.07)        | (9.87,19.9)   |
| 7        | $(p, q)$   | (0.01,0.05) | <b>(0.02,0.25)</b> | <b>(0.03,0.25)</b> | <b>(0.04,0.25)</b> | <b>(0.05,0.25)</b> |               |
|          | %          | 4.4         | 20.2               | 19                 | 14.5               | 41.9               | 100           |
|          | N          | 7.53        | 7.78               | 7.88               | 6.32               | 4.94               | 34.45         |
|          | (D,R)      | (0.08,0.36) | (0.14,1.91)        | (0.25,1.99)        | (0.23,1.55)        | (0.24,1.23)        | (0.94,7.04)   |
| 8        | $(p, q)$   | (0.01,0.05) | (0.02,0.25)        | <b>(0.03,0.4)</b>  | <b>(0.04,0.4)</b>  | <b>(0.05,0.4)</b>  |               |
|          | %          | 4.2         | 8.9                | 22                 | 19                 | 45.9               | 100           |
|          | N          | 7.43        | 7.97               | 8.09               | 7.46               | 5.73               | 36.68         |
|          | (D,R)      | (0.07,0.42) | (0.17,2.04)        | (0.26,3.35)        | (0.3,3.03)         | (0.27,2.3)         | (1.08,11.14)  |
| 9        | $(p, q)$   | (0.01,0.05) | (0.02,0.25)        | (0.03,0.4)         | <b>(0.04,0.6)</b>  | <b>(0.05,0.6)</b>  |               |
|          | %          | 4.3         | 7.7                | 5.9                | 19.6               | 62.5               | 100           |
|          | N          | 7.39        | 7.87               | 8.01               | 7.7                | 7.22               | 38.19         |
|          | (D,R)      | (0.06,0.35) | (0.15,1.94)        | (0.26,3.27)        | (0.31,4.61)        | (0.38,4.36)        | (1.16,14.54)  |
| 10       | $(p, q)$   | (0.01,0.05) | <b>(0.02,0.25)</b> | (0.03,0.05)        | (0.04,0.05)        | (0.05,0.05)        |               |
|          | %          | 3.4         | 70.3               | 11.7               | 4.8                | 9.8                | 100           |
|          | N          | 7.48        | 7.93               | 7.25               | 2.17               | 1.3                | 26.13         |
|          | (D,R)      | (0.08,0.37) | (0.16,2)           | (0.2,0.35)         | (0.1,0.11)         | (0.08,0.06)        | (0.61,2.88)   |
| 11       | $(p, q)$   | (0.01,0.05) | (0.02,0.2)         | <b>(0.03,0.4)</b>  | (0.04,0.15)        | (0.05,0.15)        |               |
|          | %          | 6.7         | 4.7                | 60.2               | 13                 | 15.4               | 100           |
|          | N          | 7.43        | 7.92               | 7.75               | 7.04               | 2.41               | 32.55         |
|          | (D,R)      | (0.07,0.38) | (0.16,1.59)        | (0.24,3.1)         | (0.31,1.04)        | (0.11,0.32)        | (0.89,6.43)   |
| 12       | $(p, q)$   | (0.01,0.05) | (0.02,0.2)         | (0.03,0.3)         | <b>(0.04,0.6)</b>  | (0.05,0.3)         |               |
|          | %          | 6.5         | 12.8               | 2.1                | 54                 | 24.6               | 100           |
|          | N          | 7.44        | 7.87               | 7.74               | 6.96               | 6.19               | 36.21         |
|          | (D,R)      | (0.07,0.37) | (0.15,1.52)        | (0.24,2.31)        | (0.26,4.17)        | (0.3,1.88)         | (1.03,10.24)  |
| 13       | $(p, q)$   | (0.01,0.05) | (0.02,0.05)        | <b>(0.03,0.3)</b>  | (0.04,0.05)        | (0.05,0.05)        |               |
|          | %          | 19.6        | 2.6                | 61.6               | 8                  | 8.2                | 100           |
|          | N          | 7.38        | 7.78               | 6.64               | 5.89               | 1.39               | 29.09         |
|          | (D,R)      | (0.06,0.35) | (0.15,0.4)         | (0.2,1.95)         | (0.24,0.27)        | (0.08,0.08)        | (0.72,3.05)   |
| 14       | $(p, q)$   | (0.01,0.05) | (0.02,0.05)        | (0.03,0.05)        | <b>(0.04,0.3)</b>  | (0.05,0.05)        |               |
|          | %          | 22.8        | 19.3               | 2.1                | 44.7               | 11.1               | 100           |
|          | N          | 7.41        | 7.65               | 6.2                | 4.98               | 4.38               | 30.61         |
|          | (D,R)      | (0.06,0.38) | (0.14,0.35)        | (0.17,0.33)        | (0.18,1.53)        | (0.2,0.21)         | (0.77,2.8)    |
| 15       | $(p, q)$   | (0.01,0.05) | (0.02,0.05)        | (0.03,0.05)        | (0.04,0.05)        | <b>(0.05,0.3)</b>  |               |
|          | %          | 19          | 18.5               | 14.9               | 1.7                | 45.9               | 100           |
|          | N          | 7.56        | 7.75               | 6.49               | 5.3                | 4.38               | 31.47         |
|          | (D,R)      | (0.09,0.38) | (0.16,0.38)        | (0.19,0.33)        | (0.21,0.25)        | (0.22,1.25)        | (0.87,2.59)   |

Table 14: Simulation results using the non-parametric+ model. Cohort size 7 and maximum size 14 for each dose level.  $r^{(l)} = 10$ .  $\tau^{(l)}$ s are misspecified as half of the true DLT risk.

| Scenario | Dose Level |             |                    |                    |                    | Total              |               |
|----------|------------|-------------|--------------------|--------------------|--------------------|--------------------|---------------|
|          | 1          | 2           | 3                  | 4                  | 5                  |                    |               |
| 1        | $(p, q)$   | (0.01,0.05) | (0.02,0.2)         | (0.03,0.35)        | (0.04,0.6)         | <b>(0.05,0.8)</b>  | 100           |
|          | %          | 5.6         | 7.4                | 3.6                | 4.2                | 79.2               | 100           |
|          | N          | 7.48        | 7.15               | 6.8                | 6.27               | 6.22               | 33.92         |
|          | (D,R)      | (0.07,0.35) | (0.14,1.44)        | (0.18,2.37)        | (0.28,3.78)        | (0.33,5)           | (1,12.94)     |
| 2        | $(p, q)$   | (0.01,0.57) | (0.03,0.58)        | (0.06,0.6)         | <b>(0.2,0.62)</b>  | (0.32,0.64)        | 100           |
|          | %          | 20.2        | 18.7               | 17.1               | 16.3               | 27.7               | 100           |
|          | N          | 7.46        | 7.21               | 6.42               | 6.64               | 5.2                | 32.94         |
|          | (D,R)      | (0.07,4.26) | (0.22,4.2)         | (0.41,3.83)        | (1.31,4.12)        | (1.59,3.32)        | (3.6,19.72)   |
| 3        | $(p, q)$   | (0.02,0.2)  | (0.03,0.4)         | (0.04,0.6)         | (0.06,0.68)        | <b>(0.2,0.74)</b>  | 100           |
|          | %          | 5.7         | 5                  | 13.2               | 13.9               | 62.2               | 100           |
|          | N          | 7.83        | 7.44               | 7.08               | 6.69               | 8.64               | 37.69         |
|          | (D,R)      | (0.15,1.52) | (0.23,2.94)        | (0.27,4.25)        | (0.37,4.52)        | (1.78,6.42)        | (2.8,19.65)   |
| 4        | $(p, q)$   | (0.01,0.52) | (0.01,0.62)        | (0.02,0.71)        | (0.03,0.79)        | <b>(0.03,0.86)</b> | 100           |
|          | %          | 11.2        | 11.5               | 11.5               | 11.5               | 54.3               | 100           |
|          | N          | 7.47        | 7.12               | 6.3                | 5.47               | 4.66               | 31.02         |
|          | (D,R)      | (0.08,3.92) | (0.12,4.45)        | (0.13,4.51)        | (0.12,4.29)        | (0.15,3.97)        | (0.6,21.14)   |
| 5        | $(p, q)$   | (0.18,0.05) | (0.22,0.2)         | <b>(0.26,0.35)</b> | (0.3,0.47)         | (0.33,0.58)        | 96.5          |
|          | %          | 8.3         | 11.2               | 15.5               | 14.9               | 46.6               | 96.5          |
|          | N          | 12.25       | 12.22              | 11.57              | 9.93               | 7.83               | 53.8          |
|          | (D,R)      | (2.23,0.59) | (2.66,2.36)        | (3.02,4.1)         | (2.94,4.65)        | (2.57,4.54)        | (13.41,16.24) |
| 6        | $(p, q)$   | (0.08,0.15) | (0.18,0.38)        | <b>(0.25,0.52)</b> | (0.3,0.59)         | (0.35,0.62)        | 99.8          |
|          | %          | 4.6         | 11.5               | 21.9               | 29.3               | 32.5               | 99.8          |
|          | N          | 10.03       | 11.19              | 12.26              | 10.46              | 7.1                | 51.04         |
|          | (D,R)      | (0.8,1.5)   | (2.05,4.24)        | (3.14,6.43)        | (3.25,6.22)        | (2.53,4.39)        | (11.77,22.78) |
| 7        | $(p, q)$   | (0.01,0.05) | <b>(0.02,0.25)</b> | <b>(0.03,0.25)</b> | <b>(0.04,0.25)</b> | <b>(0.05,0.25)</b> | 100           |
|          | %          | 3           | 18.9               | 19.7               | 15.6               | 42.8               | 100           |
|          | N          | 7.5         | 7.12               | 7.08               | 5.63               | 4.3                | 31.63         |
|          | (D,R)      | (0.08,0.38) | (0.14,1.75)        | (0.21,1.79)        | (0.22,1.43)        | (0.19,1.08)        | (0.83,6.43)   |
| 8        | $(p, q)$   | (0.01,0.05) | (0.02,0.25)        | <b>(0.03,0.4)</b>  | <b>(0.04,0.4)</b>  | <b>(0.05,0.4)</b>  | 100           |
|          | %          | 3.1         | 6.4                | 22.2               | 19.4               | 48.9               | 100           |
|          | N          | 7.54        | 7.13               | 7.05               | 6.51               | 5.08               | 33.31         |
|          | (D,R)      | (0.08,0.37) | (0.13,1.78)        | (0.23,2.83)        | (0.26,2.56)        | (0.27,2.02)        | (0.97,9.57)   |
| 9        | $(p, q)$   | (0.01,0.05) | (0.02,0.25)        | (0.03,0.4)         | <b>(0.04,0.6)</b>  | <b>(0.05,0.6)</b>  | 100           |
|          | %          | 3           | 6.4                | 3.7                | 19.7               | 67.2               | 100           |
|          | N          | 7.37        | 7.11               | 7.06               | 6.51               | 6.38               | 34.43         |
|          | (D,R)      | (0.06,0.34) | (0.15,1.74)        | (0.21,2.77)        | (0.26,3.94)        | (0.31,3.85)        | (0.98,12.64)  |
| 10       | $(p, q)$   | (0.01,0.05) | <b>(0.02,0.25)</b> | (0.03,0.05)        | (0.04,0.05)        | (0.05,0.05)        | 100           |
|          | %          | 3.8         | 65.9               | 12.7               | 6.7                | 10.9               | 100           |
|          | N          | 7.59        | 7.24               | 6.87               | 2.18               | 1.31               | 25.2          |
|          | (D,R)      | (0.1,0.38)  | (0.15,1.79)        | (0.19,0.34)        | (0.09,0.12)        | (0.06,0.06)        | (0.6,2.68)    |
| 11       | $(p, q)$   | (0.01,0.05) | (0.02,0.2)         | <b>(0.03,0.4)</b>  | (0.04,0.15)        | (0.05,0.15)        | 100           |
|          | %          | 8           | 5.1                | 56.6               | 11.9               | 18.4               | 100           |
|          | N          | 7.48        | 7.13               | 6.8                | 6.14               | 2.23               | 29.78         |
|          | (D,R)      | (0.07,0.42) | (0.15,1.39)        | (0.2,2.76)         | (0.23,0.9)         | (0.09,0.32)        | (0.75,5.79)   |
| 12       | $(p, q)$   | (0.01,0.05) | (0.02,0.2)         | (0.03,0.3)         | <b>(0.04,0.6)</b>  | (0.05,0.3)         | 100           |
|          | %          | 6.3         | 10.6               | 2.1                | 54                 | 27                 | 100           |
|          | N          | 7.41        | 7.11               | 6.85               | 6.03               | 5.8                | 33.21         |
|          | (D,R)      | (0.06,0.4)  | (0.16,1.42)        | (0.22,2.08)        | (0.25,3.64)        | (0.26,1.75)        | (0.95,9.28)   |
| 13       | $(p, q)$   | (0.01,0.05) | (0.02,0.05)        | <b>(0.03,0.3)</b>  | (0.04,0.05)        | (0.05,0.05)        | 100           |
|          | %          | 19.3        | 1.5                | 59.5               | 10.3               | 9.4                | 100           |
|          | N          | 7.46        | 7.15               | 5.92               | 5.62               | 1.45               | 27.59         |
|          | (D,R)      | (0.07,0.35) | (0.15,0.35)        | (0.17,1.76)        | (0.22,0.28)        | (0.07,0.07)        | (0.69,2.8)    |
| 14       | $(p, q)$   | (0.01,0.05) | (0.02,0.05)        | (0.03,0.05)        | <b>(0.04,0.3)</b>  | (0.05,0.05)        | 99.9          |
|          | %          | 19.6        | 19.7               | 1.5                | 43.8               | 15.3               | 99.9          |
|          | N          | 7.44        | 7.11               | 5.92               | 4.43               | 4.23               | 29.13         |
|          | (D,R)      | (0.07,0.35) | (0.16,0.36)        | (0.18,0.3)         | (0.18,1.34)        | (0.22,0.24)        | (0.8,2.6)     |
| 15       | $(p, q)$   | (0.01,0.05) | (0.02,0.05)        | (0.03,0.05)        | (0.04,0.05)        | <b>(0.05,0.3)</b>  | 100           |
|          | %          | 19.3        | 19.4               | 15.4               | 1.6                | 44.3               | 100           |
|          | N          | 7.45        | 7.15               | 5.87               | 4.42               | 3.45               | 28.35         |
|          | (D,R)      | (0.07,0.36) | (0.16,0.34)        | (0.17,0.28)        | (0.17,0.22)        | (0.18,1.05)        | (0.74,2.25)   |

Table 15: Simulation results using the parametric model. Cohort size 7 and maximum size 14 for each dose level.  $r^{(l)} = 10$ .  $\tau^{(l)}$ s are misspecified as half of the true DLT risk.

| Scenario | Dose Level |             |                    |                    |                    | Total              |               |
|----------|------------|-------------|--------------------|--------------------|--------------------|--------------------|---------------|
|          | 1          | 2           | 3                  | 4                  | 5                  |                    |               |
| 1        | $(p, q)$   | (0.01,0.05) | (0.02,0.2)         | (0.03,0.35)        | (0.04,0.6)         | <b>(0.05,0.8)</b>  |               |
|          | %          | 6.4         | 7.3                | 2.7                | 4.9                | 78.7               | 100           |
|          | N          | 7.57        | 7.19               | 6.83               | 6.22               | 6.2                | 34.01         |
|          | (D,R)      | (0.09,0.36) | (0.15,1.42)        | (0.21,2.36)        | (0.24,3.76)        | (0.3,5.01)         | (0.98,12.91)  |
| 2        | $(p, q)$   | (0.01,0.57) | (0.03,0.58)        | (0.06,0.6)         | <b>(0.2,0.62)</b>  | (0.32,0.64)        |               |
|          | %          | 20.6        | 19                 | 16.2               | 15                 | 29.2               | 100           |
|          | N          | 7.5         | 7.24               | 6.29               | 6.66               | 5.31               | 32.99         |
|          | (D,R)      | (0.08,4.21) | (0.23,4.13)        | (0.39,3.76)        | (1.32,4.1)         | (1.7,3.42)         | (3.71,19.62)  |
| 3        | $(p, q)$   | (0.02,0.2)  | (0.03,0.4)         | (0.04,0.6)         | (0.06,0.68)        | <b>(0.2,0.74)</b>  |               |
|          | %          | 5.1         | 4.5                | 13.1               | 17.1               | 60.2               | 100           |
|          | N          | 7.86        | 7.43               | 7.2                | 6.84               | 8.97               | 38.3          |
|          | (D,R)      | (0.15,1.6)  | (0.24,2.94)        | (0.29,4.38)        | (0.42,4.68)        | (1.86,6.61)        | (2.95,20.21)  |
| 4        | $(p, q)$   | (0.01,0.52) | (0.01,0.62)        | (0.02,0.71)        | (0.03,0.79)        | <b>(0.03,0.86)</b> |               |
|          | %          | 12.3        | 11.9               | 13.1               | 11.3               | 51.4               | 100           |
|          | N          | 7.41        | 7.1                | 6.21               | 5.36               | 4.44               | 30.51         |
|          | (D,R)      | (0.07,3.89) | (0.11,4.38)        | (0.14,4.46)        | (0.14,4.22)        | (0.13,3.81)        | (0.58,20.76)  |
| 5        | $(p, q)$   | (0.18,0.05) | (0.22,0.2)         | <b>(0.26,0.35)</b> | (0.3,0.47)         | (0.33,0.58)        |               |
|          | %          | 7.3         | 10.6               | 14.1               | 16.5               | 47.9               | 96.4          |
|          | N          | 12.14       | 12.1               | 11.66              | 10.18              | 8.16               | 54.24         |
|          | (D,R)      | (2.17,0.61) | (2.63,2.45)        | (3.04,4.08)        | (3.03,4.75)        | (2.66,4.75)        | (13.54,16.64) |
| 6        | $(p, q)$   | (0.08,0.15) | (0.18,0.38)        | <b>(0.25,0.52)</b> | (0.3,0.59)         | (0.35,0.62)        |               |
|          | %          | 4.5         | 12.2               | 21.2               | 25.2               | 36.7               | 99.8          |
|          | N          | 9.98        | 11                 | 12.2               | 10.37              | 7.27               | 50.83         |
|          | (D,R)      | (0.77,1.44) | (2.02,4.14)        | (3.08,6.33)        | (3.08,6.12)        | (2.52,4.51)        | (11.48,22.54) |
| 7        | $(p, q)$   | (0.01,0.05) | <b>(0.02,0.25)</b> | <b>(0.03,0.25)</b> | <b>(0.04,0.25)</b> | <b>(0.05,0.25)</b> |               |
|          | %          | 4.9         | 20.3               | 18.9               | 14.8               | 41.1               | 100           |
|          | N          | 7.47        | 7.2                | 6.89               | 5.42               | 4.18               | 31.16         |
|          | (D,R)      | (0.07,0.39) | (0.14,1.7)         | (0.21,1.69)        | (0.24,1.36)        | (0.22,1.04)        | (0.88,6.18)   |
| 8        | $(p, q)$   | (0.01,0.05) | (0.02,0.25)        | <b>(0.03,0.4)</b>  | <b>(0.04,0.4)</b>  | <b>(0.05,0.4)</b>  |               |
|          | %          | 4           | 7.9                | 19.9               | 16.9               | 51.3               | 100           |
|          | N          | 7.41        | 7.15               | 7.04               | 6.31               | 5                  | 32.92         |
|          | (D,R)      | (0.06,0.38) | (0.16,1.75)        | (0.2,2.82)         | (0.26,2.49)        | (0.24,1.99)        | (0.92,9.43)   |
| 9        | $(p, q)$   | (0.01,0.05) | (0.02,0.25)        | (0.03,0.4)         | <b>(0.04,0.6)</b>  | <b>(0.05,0.6)</b>  |               |
|          | %          | 3.6         | 9.4                | 6                  | 15.5               | 65.5               | 100           |
|          | N          | 7.48        | 7.15               | 7.07               | 6.28               | 5.99               | 33.98         |
|          | (D,R)      | (0.08,0.37) | (0.15,1.79)        | (0.19,2.8)         | (0.24,3.75)        | (0.29,3.61)        | (0.95,12.32)  |
| 10       | $(p, q)$   | (0.01,0.05) | <b>(0.02,0.25)</b> | (0.03,0.05)        | (0.04,0.05)        | (0.05,0.05)        |               |
|          | %          | 4.2         | 67.9               | 15.9               | 4.9                | 7.1                | 100           |
|          | N          | 7.53        | 7.19               | 6.81               | 1.97               | 0.9                | 24.4          |
|          | (D,R)      | (0.08,0.39) | (0.15,1.8)         | (0.2,0.33)         | (0.07,0.09)        | (0.05,0.06)        | (0.55,2.67)   |
| 11       | $(p, q)$   | (0.01,0.05) | (0.02,0.2)         | <b>(0.03,0.4)</b>  | (0.04,0.15)        | (0.05,0.15)        |               |
|          | %          | 5.8         | 5.5                | 56.7               | 13.3               | 18.7               | 100           |
|          | N          | 7.56        | 7.18               | 6.87               | 6.3                | 2.32               | 30.24         |
|          | (D,R)      | (0.09,0.39) | (0.16,1.46)        | (0.22,2.8)         | (0.26,0.95)        | (0.1,0.34)         | (0.82,5.94)   |
| 12       | $(p, q)$   | (0.01,0.05) | (0.02,0.2)         | (0.03,0.3)         | <b>(0.04,0.6)</b>  | (0.05,0.3)         |               |
|          | %          | 6.5         | 9.1                | 2.4                | 56.1               | 25.9               | 100           |
|          | N          | 7.53        | 7.17               | 6.86               | 6.15               | 5.87               | 33.59         |
|          | (D,R)      | (0.08,0.37) | (0.16,1.44)        | (0.2,2.17)         | (0.24,3.74)        | (0.31,1.79)        | (0.99,9.5)    |
| 13       | $(p, q)$   | (0.01,0.05) | (0.02,0.05)        | <b>(0.03,0.3)</b>  | (0.04,0.05)        | (0.05,0.05)        |               |
|          | %          | 21.2        | 1.6                | 57.9               | 12                 | 7.3                | 100           |
|          | N          | 7.53        | 7.14               | 5.73               | 5.46               | 1.42               | 27.27         |
|          | (D,R)      | (0.08,0.38) | (0.14,0.33)        | (0.18,1.76)        | (0.22,0.28)        | (0.07,0.07)        | (0.7,2.82)    |
| 14       | $(p, q)$   | (0.01,0.05) | (0.02,0.05)        | (0.03,0.05)        | <b>(0.04,0.3)</b>  | (0.05,0.05)        |               |
|          | %          | 20.2        | 21.8               | 1.6                | 43.7               | 12.7               | 100           |
|          | N          | 7.53        | 7.15               | 5.78               | 4.19               | 4.06               | 28.7          |
|          | (D,R)      | (0.08,0.38) | (0.15,0.38)        | (0.17,0.3)         | (0.17,1.24)        | (0.2,0.2)          | (0.77,2.51)   |
| 15       | $(p, q)$   | (0.01,0.05) | (0.02,0.05)        | (0.03,0.05)        | (0.04,0.05)        | <b>(0.05,0.3)</b>  |               |
|          | %          | 20.4        | 21.6               | 16.5               | 1.9                | 39.6               | 100           |
|          | N          | 7.38        | 7.17               | 5.78               | 4.16               | 3.08               | 27.57         |
|          | (D,R)      | (0.06,0.35) | (0.15,0.38)        | (0.19,0.28)        | (0.17,0.22)        | (0.16,0.9)         | (0.72,2.13)   |

Table 16: Simulation results using the parametric+ model. Cohort size 7 and maximum size 14 for each dose level.  $r^{(l)} = 10$ .  $\tau^{(l)}$ s are misspecified as half of the true DLT risk.

### 3.4 $\mathcal{C}_1 = 0.75$

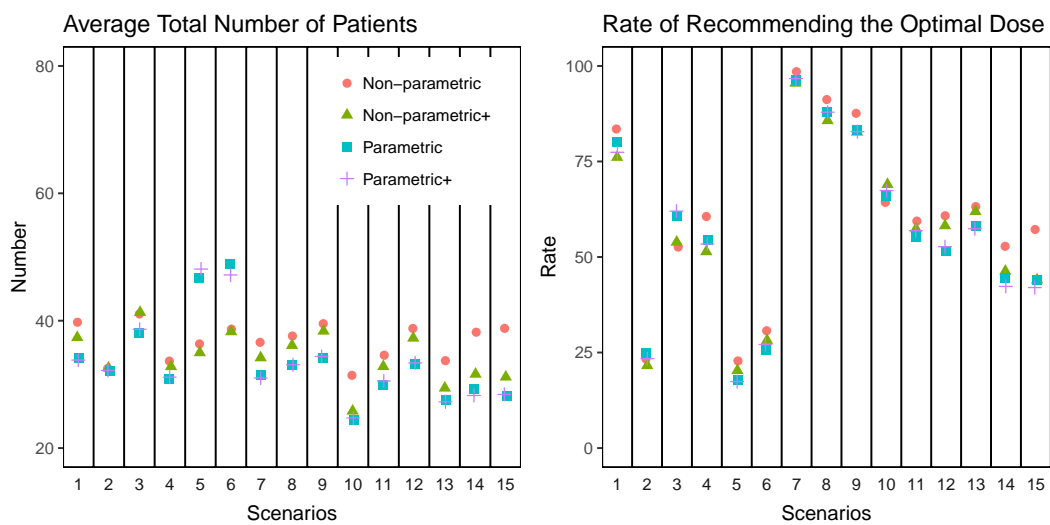

Figure 5: Average total number of patients and the average rate of reporting the optimal dose levels(s) for Scenarios 1-15.

| Scenario | Dose Level |             |                    |                    |                    | Total              |              |
|----------|------------|-------------|--------------------|--------------------|--------------------|--------------------|--------------|
|          | 1          | 2           | 3                  | 4                  | 5                  |                    |              |
| 1        | $(p, q)$   | (0.01,0.05) | (0.02,0.2)         | (0.03,0.35)        | (0.04,0.6)         | <b>(0.05,0.8)</b>  |              |
|          | %          | 2           | 7.2                | 3.4                | 3.9                | 83.5               | 100          |
|          | N          | 7.46        | 8.34               | 8.19               | 7.92               | 7.85               | 39.76        |
|          | $(D, R)$   | (0.07,0.41) | (0.14,1.68)        | (0.21,2.83)        | (0.31,4.72)        | (0.39,6.33)        | (1.12,15.97) |
| 2        | $(p, q)$   | (0.01,0.57) | (0.03,0.58)        | (0.06,0.6)         | <b>(0.2,0.62)</b>  | (0.32,0.64)        |              |
|          | %          | 20.6        | 21.4               | 21.6               | 23.3               | 13.1               | 100          |
|          | N          | 7.55        | 8.08               | 7.06               | 6.22               | 3.58               | 32.49        |
|          | $(D, R)$   | (0.08,4.33) | (0.22,4.74)        | (0.4,4.16)         | (1.25,3.89)        | (1.14,2.34)        | (3.1,19.47)  |
| 3        | $(p, q)$   | (0.02,0.2)  | (0.03,0.4)         | (0.04,0.6)         | (0.06,0.68)        | <b>(0.2,0.74)</b>  |              |
|          | %          | 3.8         | 5.6                | 13.5               | 24.5               | 52.6               | 100          |
|          | N          | 7.79        | 8.34               | 8.29               | 8.47               | 8.17               | 41.05        |
|          | $(D, R)$   | (0.14,1.58) | (0.25,3.36)        | (0.31,4.98)        | (0.52,5.73)        | (1.58,6.11)        | (2.8,21.76)  |
| 4        | $(p, q)$   | (0.01,0.52) | (0.01,0.62)        | (0.02,0.71)        | (0.03,0.79)        | <b>(0.03,0.86)</b> |              |
|          | %          | 12.1        | 12.5               | 8.8                | 6                  | 60.6               | 100          |
|          | N          | 7.48        | 7.72               | 6.84               | 6.01               | 5.61               | 33.66        |
|          | $(D, R)$   | (0.08,3.88) | (0.13,4.78)        | (0.13,4.81)        | (0.15,4.76)        | (0.19,4.81)        | (0.67,23.05) |
| 5        | $(p, q)$   | (0.18,0.05) | (0.22,0.2)         | <b>(0.26,0.35)</b> | (0.3,0.47)         | (0.33,0.58)        |              |
|          | %          | 17.1        | 26.8               | 22.8               | 11.8               | 9.6                | 88.1         |
|          | N          | 11.37       | 10.46              | 7.66               | 4.6                | 2.27               | 36.36        |
|          | $(D, R)$   | (2,0.53)    | (2.3,2.1)          | (1.96,2.68)        | (1.38,2.18)        | (0.75,1.32)        | (8.39,8.82)  |
| 6        | $(p, q)$   | (0.08,0.15) | (0.18,0.38)        | <b>(0.25,0.52)</b> | (0.3,0.59)         | (0.35,0.62)        |              |
|          | %          | 13.1        | 29.9               | 30.7               | 16.2               | 8.5                | 98.4         |
|          | N          | 9.92        | 11.28              | 9.38               | 5.7                | 2.39               | 38.67        |
|          | $(D, R)$   | (0.76,1.51) | (2.06,4.37)        | (2.33,4.93)        | (1.74,3.32)        | (0.85,1.49)        | (7.74,15.62) |
| 7        | $(p, q)$   | (0.01,0.05) | <b>(0.02,0.25)</b> | <b>(0.03,0.25)</b> | <b>(0.04,0.25)</b> | <b>(0.05,0.25)</b> |              |
|          | %          | 1.5         | 19.9               | 17.3               | 16.1               | 45.2               | 100          |
|          | N          | 7.55        | 8.25               | 8.37               | 6.9                | 5.52               | 36.6         |
|          | $(D, R)$   | (0.09,0.37) | (0.17,2.05)        | (0.26,2.07)        | (0.28,1.81)        | (0.28,1.36)        | (1.06,7.65)  |
| 8        | $(p, q)$   | (0.01,0.05) | (0.02,0.25)        | <b>(0.03,0.4)</b>  | <b>(0.04,0.4)</b>  | <b>(0.05,0.4)</b>  |              |
|          | %          | 1.4         | 7.4                | 21.6               | 19.4               | 50.2               | 100          |
|          | N          | 7.53        | 8.25               | 8.29               | 7.6                | 5.94               | 37.6         |
|          | $(D, R)$   | (0.08,0.37) | (0.17,2.1)         | (0.26,3.29)        | (0.27,3.01)        | (0.29,2.37)        | (1.08,11.14) |
| 9        | $(p, q)$   | (0.01,0.05) | (0.02,0.25)        | (0.03,0.4)         | <b>(0.04,0.6)</b>  | <b>(0.05,0.6)</b>  |              |
|          | %          | 0.3         | 7                  | 5.1                | 20.9               | 66.7               | 100          |
|          | N          | 7.47        | 8.16               | 8.32               | 7.94               | 7.64               | 39.53        |
|          | $(D, R)$   | (0.08,0.33) | (0.16,2.04)        | (0.25,3.31)        | (0.31,4.77)        | (0.41,4.6)         | (1.2,15.05)  |
| 10       | $(p, q)$   | (0.01,0.05) | <b>(0.02,0.25)</b> | (0.03,0.05)        | (0.04,0.05)        | (0.05,0.05)        |              |
|          | %          | 1           | 64.3               | 11.5               | 4.6                | 18.6               | 100          |
|          | N          | 7.38        | 8.37               | 9.25               | 3.82               | 2.6                | 31.42        |
|          | $(D, R)$   | (0.06,0.37) | (0.17,2.06)        | (0.28,0.44)        | (0.15,0.18)        | (0.13,0.14)        | (0.79,3.19)  |
| 11       | $(p, q)$   | (0.01,0.05) | (0.02,0.2)         | <b>(0.03,0.4)</b>  | (0.04,0.15)        | (0.05,0.15)        |              |
|          | %          | 2.6         | 5.3                | 59.4               | 10.7               | 22                 | 100          |
|          | N          | 7.47        | 8.58               | 8.21               | 7.36               | 2.96               | 34.58        |
|          | $(D, R)$   | (0.08,0.38) | (0.2,1.74)         | (0.25,3.22)        | (0.28,1.06)        | (0.11,0.42)        | (0.9,6.81)   |
| 12       | $(p, q)$   | (0.01,0.05) | (0.02,0.2)         | (0.03,0.3)         | <b>(0.04,0.6)</b>  | (0.05,0.3)         |              |
|          | %          | 1.9         | 10.2               | 1.9                | 60.8               | 25.2               | 100          |
|          | N          | 7.5         | 8.42               | 8.39               | 7.68               | 6.79               | 38.79        |
|          | $(D, R)$   | (0.08,0.38) | (0.16,1.68)        | (0.26,2.51)        | (0.3,4.57)         | (0.35,2.03)        | (1.15,11.18) |
| 13       | $(p, q)$   | (0.01,0.05) | (0.02,0.05)        | <b>(0.03,0.3)</b>  | (0.04,0.05)        | (0.05,0.05)        |              |
|          | %          | 16.3        | 0.6                | 63.2               | 7.5                | 12.4               | 100          |
|          | N          | 7.43        | 9.57               | 7.04               | 7.26               | 2.43               | 33.73        |
|          | $(D, R)$   | (0.07,0.39) | (0.17,0.48)        | (0.18,2.15)        | (0.3,0.34)         | (0.11,0.11)        | (0.84,3.47)  |
| 14       | $(p, q)$   | (0.01,0.05) | (0.02,0.05)        | (0.03,0.05)        | <b>(0.04,0.3)</b>  | (0.05,0.05)        |              |
|          | %          | 16.2        | 14.8               | 0.5                | 52.8               | 15.7               | 100          |
|          | N          | 7.5         | 9.79               | 8.59               | 6.14               | 6.17               | 38.19        |
|          | $(D, R)$   | (0.08,0.37) | (0.2,0.45)         | (0.26,0.44)        | (0.22,1.82)        | (0.29,0.27)        | (1.05,3.35)  |
| 15       | $(p, q)$   | (0.01,0.05) | (0.02,0.05)        | (0.03,0.05)        | (0.04,0.05)        | <b>(0.05,0.3)</b>  |              |
|          | %          | 15.4        | 14.7               | 12.2               | 0.5                | 57.2               | 100          |
|          | N          | 7.41        | 9.66               | 8.81               | 7.49               | 5.43               | 38.8         |
|          | $(D, R)$   | (0.07,0.36) | (0.21,0.49)        | (0.25,0.46)        | (0.3,0.35)         | (0.27,1.61)        | (1.1,3.28)   |

Table 17: Simulation results using the non-parametric model. Cohort size 7 and maximum size 14 for each dose level.  $r^{(l)} = 10$ .  $\mathcal{C}_1 = 0.75$



| Scenario | Dose Level |             |                    |                    |                    | Total              |              |
|----------|------------|-------------|--------------------|--------------------|--------------------|--------------------|--------------|
|          | 1          | 2           | 3                  | 4                  | 5                  |                    |              |
| 1        | $(p, q)$   | (0.01,0.05) | (0.02,0.2)         | (0.03,0.35)        | (0.04,0.6)         | <b>(0.05,0.8)</b>  |              |
|          | %          | 6.7         | 8.3                | 4.2                | 4.7                | 76.1               | 100          |
|          | N          | 7.38        | 7.92               | 7.69               | 7.29               | 7.1                | 37.37        |
|          | $(D, R)$   | (0.06,0.38) | (0.16,1.61)        | (0.22,2.62)        | (0.3,4.36)         | (0.35,5.65)        | (1.09,14.62) |
| 2        | $(p, q)$   | (0.01,0.57) | (0.03,0.58)        | (0.06,0.6)         | <b>(0.2,0.62)</b>  | (0.32,0.64)        |              |
|          | %          | 21.5        | 18.1               | 25                 | 21.6               | 13.8               | 100          |
|          | N          | 7.41        | 8.13               | 7.13               | 6.42               | 3.48               | 32.58        |
|          | $(D, R)$   | (0.06,4.28) | (0.24,4.74)        | (0.41,4.34)        | (1.3,3.98)         | (1.11,2.22)        | (3.13,19.55) |
| 3        | $(p, q)$   | (0.02,0.2)  | (0.03,0.4)         | (0.04,0.6)         | (0.06,0.68)        | <b>(0.2,0.74)</b>  |              |
|          | %          | 4           | 5.3                | 14.7               | 22                 | 53.9               | 99.9         |
|          | N          | 7.91        | 8.33               | 8.42               | 8.17               | 8.48               | 41.31        |
|          | $(D, R)$   | (0.15,1.57) | (0.27,3.35)        | (0.34,5.14)        | (0.49,5.54)        | (1.64,6.26)        | (2.89,21.85) |
| 4        | $(p, q)$   | (0.01,0.52) | (0.01,0.62)        | (0.02,0.71)        | (0.03,0.79)        | <b>(0.03,0.86)</b> |              |
|          | %          | 13.9        | 13.7               | 11                 | 10                 | 51.4               | 100          |
|          | N          | 7.59        | 7.64               | 6.79               | 5.84               | 4.94               | 32.8         |
|          | $(D, R)$   | (0.09,4.06) | (0.12,4.67)        | (0.13,4.74)        | (0.15,4.57)        | (0.13,4.27)        | (0.63,22.3)  |
| 5        | $(p, q)$   | (0.18,0.05) | (0.22,0.2)         | <b>(0.26,0.35)</b> | (0.3,0.47)         | (0.33,0.58)        |              |
|          | %          | 20.7        | 25.4               | 20.3               | 12.6               | 8.5                | 87.5         |
|          | N          | 11.27       | 9.86               | 7.39               | 4.32               | 2.14               | 34.98        |
|          | $(D, R)$   | (2,0.55)    | (2.18,1.95)        | (1.98,2.57)        | (1.3,2.04)         | (0.7,1.25)         | (8.16,8.36)  |
| 6        | $(p, q)$   | (0.08,0.15) | (0.18,0.38)        | <b>(0.25,0.52)</b> | (0.3,0.59)         | (0.35,0.62)        |              |
|          | %          | 17.2        | 27.3               | 28.2               | 18.3               | 7.7                | 98.7         |
|          | N          | 9.97        | 11.25              | 8.97               | 5.66               | 2.43               | 38.28        |
|          | $(D, R)$   | (0.76,1.45) | (2.1,4.32)         | (2.29,4.71)        | (1.68,3.38)        | (0.89,1.52)        | (7.72,15.38) |
| 7        | $(p, q)$   | (0.01,0.05) | <b>(0.02,0.25)</b> | <b>(0.03,0.25)</b> | <b>(0.04,0.25)</b> | <b>(0.05,0.25)</b> |              |
|          | %          | 4.5         | 21                 | 20                 | 16.1               | 38.4               | 100          |
|          | N          | 7.43        | 7.98               | 7.75               | 6.24               | 4.78               | 34.18        |
|          | $(D, R)$   | (0.07,0.36) | (0.17,1.9)         | (0.23,1.95)        | (0.24,1.55)        | (0.26,1.19)        | (0.96,6.95)  |
| 8        | $(p, q)$   | (0.01,0.05) | (0.02,0.25)        | <b>(0.03,0.4)</b>  | <b>(0.04,0.4)</b>  | <b>(0.05,0.4)</b>  |              |
|          | %          | 3.8         | 10.5               | 22                 | 19.6               | 44.1               | 100          |
|          | N          | 7.55        | 7.95               | 8.14               | 7.15               | 5.34               | 36.12        |
|          | $(D, R)$   | (0.08,0.39) | (0.16,2.06)        | (0.27,3.22)        | (0.26,2.85)        | (0.24,2.1)         | (1.02,10.62) |
| 9        | $(p, q)$   | (0.01,0.05) | (0.02,0.25)        | (0.03,0.4)         | <b>(0.04,0.6)</b>  | <b>(0.05,0.6)</b>  |              |
|          | %          | 3.3         | 6.8                | 7.2                | 20.2               | 62.5               | 100          |
|          | N          | 7.55        | 7.92               | 7.92               | 7.76               | 7.22               | 38.37        |
|          | $(D, R)$   | (0.08,0.37) | (0.16,2)           | (0.22,3.19)        | (0.33,4.61)        | (0.38,4.36)        | (1.17,14.51) |
| 10       | $(p, q)$   | (0.01,0.05) | <b>(0.02,0.25)</b> | (0.03,0.05)        | (0.04,0.05)        | (0.05,0.05)        |              |
|          | %          | 4.4         | 69                 | 13.5               | 4.9                | 8.2                | 100          |
|          | N          | 7.41        | 7.92               | 7.16               | 2.13               | 1.2                | 25.82        |
|          | $(D, R)$   | (0.06,0.34) | (0.16,1.94)        | (0.23,0.34)        | (0.09,0.09)        | (0.07,0.05)        | (0.61,2.76)  |
| 11       | $(p, q)$   | (0.01,0.05) | (0.02,0.2)         | <b>(0.03,0.4)</b>  | (0.04,0.15)        | (0.05,0.15)        |              |
|          | %          | 6.2         | 5.3                | 57.4               | 12.9               | 18.2               | 100          |
|          | N          | 7.58        | 7.88               | 7.73               | 6.93               | 2.69               | 32.81        |
|          | $(D, R)$   | (0.09,0.41) | (0.16,1.6)         | (0.21,3.06)        | (0.28,1.05)        | (0.13,0.41)        | (0.87,6.54)  |
| 12       | $(p, q)$   | (0.01,0.05) | (0.02,0.2)         | (0.03,0.3)         | <b>(0.04,0.6)</b>  | (0.05,0.3)         |              |
|          | %          | 5.6         | 8.7                | 2.5                | 58.2               | 25                 | 100          |
|          | N          | 7.5         | 7.87               | 7.81               | 7.45               | 6.64               | 37.27        |
|          | $(D, R)$   | (0.08,0.39) | (0.15,1.59)        | (0.24,2.4)         | (0.29,4.44)        | (0.33,1.96)        | (1.08,10.79) |
| 13       | $(p, q)$   | (0.01,0.05) | (0.02,0.05)        | <b>(0.03,0.3)</b>  | (0.04,0.05)        | (0.05,0.05)        |              |
|          | %          | 17.9        | 3.2                | 61.9               | 9.8                | 7.2                | 100          |
|          | N          | 7.48        | 7.78               | 6.71               | 6.03               | 1.41               | 29.43        |
|          | $(D, R)$   | (0.08,0.36) | (0.16,0.4)         | (0.19,2.05)        | (0.26,0.33)        | (0.08,0.06)        | (0.77,3.2)   |
| 14       | $(p, q)$   | (0.01,0.05) | (0.02,0.05)        | (0.03,0.05)        | <b>(0.04,0.3)</b>  | (0.05,0.05)        |              |
|          | %          | 19          | 20                 | 2.2                | 46.3               | 12.5               | 100          |
|          | N          | 7.4         | 7.74               | 6.59               | 5.31               | 4.58               | 31.6         |
|          | $(D, R)$   | (0.06,0.36) | (0.15,0.4)         | (0.2,0.33)         | (0.22,1.58)        | (0.23,0.24)        | (0.87,2.91)  |
| 15       | $(p, q)$   | (0.01,0.05) | (0.02,0.05)        | (0.03,0.05)        | (0.04,0.05)        | <b>(0.05,0.3)</b>  |              |
|          | %          | 20.8        | 17.7               | 16.5               | 1                  | 44                 | 100          |
|          | N          | 7.5         | 7.79               | 6.47               | 5.31               | 4.08               | 31.16        |
|          | $(D, R)$   | (0.08,0.38) | (0.16,0.37)        | (0.19,0.36)        | (0.24,0.26)        | (0.2,1.23)         | (0.87,2.6)   |

Table 18: Simulation results using the non-parametric+ model. Cohort size 7 and maximum size 14 for each dose level.  $r^{(l)} = 10$ .  $\mathcal{C}_1 = 0.75$

| Scenario | Dose Level |             |                    |                    |                    | Total              |               |
|----------|------------|-------------|--------------------|--------------------|--------------------|--------------------|---------------|
|          | 1          | 2           | 3                  | 4                  | 5                  |                    |               |
| 1        | $(p, q)$   | (0.01,0.05) | (0.02,0.2)         | (0.03,0.35)        | (0.04,0.6)         | <b>(0.05,0.8)</b>  |               |
|          | %          | 6.1         | 7                  | 3                  | 3.9                | 80                 | 100           |
|          | N          | 7.47        | 7.14               | 6.86               | 6.33               | 6.36               | 34.16         |
|          | $(D, R)$   | (0.08,0.39) | (0.13,1.37)        | (0.2,2.42)         | (0.24,3.83)        | (0.33,5.06)        | (0.98,13.07)  |
| 2        | $(p, q)$   | (0.01,0.57) | (0.03,0.58)        | (0.06,0.6)         | <b>(0.2,0.62)</b>  | (0.32,0.64)        |               |
|          | %          | 20.4        | 19.5               | 18.1               | 24.9               | 17.1               | 100           |
|          | N          | 7.54        | 7.27               | 6.32               | 6.57               | 4.36               | 32.06         |
|          | $(D, R)$   | (0.08,4.26) | (0.24,4.17)        | (0.37,3.78)        | (1.34,4.09)        | (1.37,2.8)         | (3.4,19.1)    |
| 3        | $(p, q)$   | (0.02,0.2)  | (0.03,0.4)         | (0.04,0.6)         | (0.06,0.68)        | <b>(0.2,0.74)</b>  |               |
|          | %          | 6.2         | 5.8                | 12.2               | 15                 | 60.8               | 100           |
|          | N          | 7.92        | 7.36               | 7.03               | 6.87               | 8.85               | 38.02         |
|          | $(D, R)$   | (0.16,1.57) | (0.22,2.85)        | (0.26,4.18)        | (0.41,4.69)        | (1.84,6.59)        | (2.89,19.88)  |
| 4        | $(p, q)$   | (0.01,0.52) | (0.01,0.62)        | (0.02,0.71)        | (0.03,0.79)        | <b>(0.03,0.86)</b> |               |
|          | %          | 12          | 12.3               | 10.1               | 11.2               | 54.4               | 100           |
|          | N          | 7.41        | 7.13               | 6.32               | 5.33               | 4.64               | 30.83         |
|          | $(D, R)$   | (0.07,3.84) | (0.12,4.39)        | (0.1,4.46)         | (0.13,4.23)        | (0.14,3.97)        | (0.57,20.89)  |
| 5        | $(p, q)$   | (0.18,0.05) | (0.22,0.2)         | <b>(0.26,0.35)</b> | (0.3,0.47)         | (0.33,0.58)        |               |
|          | %          | 9.3         | 10.5               | 17.7               | 18.3               | 31.3               | 87.1          |
|          | N          | 11.49       | 10.6               | 10.2               | 8.43               | 5.94               | 46.66         |
|          | $(D, R)$   | (2.1,0.59)  | (2.3,2.18)         | (2.62,3.52)        | (2.54,3.97)        | (1.97,3.44)        | (11.53,13.71) |
| 6        | $(p, q)$   | (0.08,0.15) | (0.18,0.38)        | <b>(0.25,0.52)</b> | (0.3,0.59)         | (0.35,0.62)        |               |
|          | %          | 4.4         | 15.3               | 25.6               | 30.1               | 24                 | 99.4          |
|          | N          | 10.15       | 11.32              | 11.91              | 9.64               | 5.94               | 48.96         |
|          | $(D, R)$   | (0.81,1.53) | (1.98,4.32)        | (2.95,6.18)        | (2.9,5.7)          | (2.1,3.69)         | (10.74,21.42) |
| 7        | $(p, q)$   | (0.01,0.05) | <b>(0.02,0.25)</b> | <b>(0.03,0.25)</b> | <b>(0.04,0.25)</b> | <b>(0.05,0.25)</b> |               |
|          | %          | 3.6         | 21.7               | 17.7               | 17.2               | 39.8               | 100           |
|          | N          | 7.48        | 7.19               | 7.03               | 5.48               | 4.29               | 31.46         |
|          | $(D, R)$   | (0.08,0.34) | (0.15,1.81)        | (0.19,1.73)        | (0.23,1.37)        | (0.21,1.05)        | (0.87,6.3)    |
| 8        | $(p, q)$   | (0.01,0.05) | (0.02,0.25)        | <b>(0.03,0.4)</b>  | <b>(0.04,0.4)</b>  | <b>(0.05,0.4)</b>  |               |
|          | %          | 4           | 8.1                | 20.6               | 18                 | 49.3               | 100           |
|          | N          | 7.57        | 7.13               | 7.03               | 6.32               | 5                  | 33.05         |
|          | $(D, R)$   | (0.09,0.4)  | (0.1,1.73)         | (0.21,2.77)        | (0.24,2.49)        | (0.24,1.98)        | (0.88,9.38)   |
| 9        | $(p, q)$   | (0.01,0.05) | (0.02,0.25)        | (0.03,0.4)         | <b>(0.04,0.6)</b>  | <b>(0.05,0.6)</b>  |               |
|          | %          | 3.5         | 8.3                | 4.9                | 21.7               | 61.6               | 100           |
|          | N          | 7.43        | 7.1                | 7.08               | 6.43               | 6.17               | 34.21         |
|          | $(D, R)$   | (0.07,0.37) | (0.14,1.84)        | (0.2,2.85)         | (0.24,3.96)        | (0.29,3.65)        | (0.94,12.68)  |
| 10       | $(p, q)$   | (0.01,0.05) | <b>(0.02,0.25)</b> | (0.03,0.05)        | (0.04,0.05)        | (0.05,0.05)        |               |
|          | %          | 5.8         | 66                 | 14.9               | 4.7                | 8.6                | 100           |
|          | N          | 7.51        | 7.16               | 6.75               | 2.04               | 1.01               | 24.48         |
|          | $(D, R)$   | (0.08,0.38) | (0.13,1.79)        | (0.2,0.33)         | (0.09,0.1)         | (0.05,0.04)        | (0.54,2.64)   |
| 11       | $(p, q)$   | (0.01,0.05) | (0.02,0.2)         | <b>(0.03,0.4)</b>  | (0.04,0.15)        | (0.05,0.15)        |               |
|          | %          | 7.2         | 6.3                | 55.2               | 12.9               | 18.4               | 100           |
|          | N          | 7.51        | 7.13               | 6.87               | 6.15               | 2.26               | 29.93         |
|          | $(D, R)$   | (0.08,0.36) | (0.15,1.45)        | (0.22,2.68)        | (0.24,0.94)        | (0.1,0.35)         | (0.79,5.77)   |
| 12       | $(p, q)$   | (0.01,0.05) | (0.02,0.2)         | (0.03,0.3)         | <b>(0.04,0.6)</b>  | (0.05,0.3)         |               |
|          | %          | 7           | 11.7               | 1.7                | 51.7               | 27.9               | 100           |
|          | N          | 7.52        | 7.17               | 6.83               | 5.92               | 5.7                | 33.14         |
|          | $(D, R)$   | (0.08,0.38) | (0.13,1.37)        | (0.2,1.97)         | (0.24,3.55)        | (0.27,1.76)        | (0.94,9.03)   |
| 13       | $(p, q)$   | (0.01,0.05) | (0.02,0.05)        | <b>(0.03,0.3)</b>  | (0.04,0.05)        | (0.05,0.05)        |               |
|          | %          | 18.7        | 2.4                | 58.2               | 9.9                | 10.8               | 100           |
|          | N          | 7.42        | 7.11               | 5.95               | 5.63               | 1.49               | 27.6          |
|          | $(D, R)$   | (0.06,0.36) | (0.13,0.38)        | (0.18,1.75)        | (0.21,0.3)         | (0.08,0.08)        | (0.66,2.88)   |
| 14       | $(p, q)$   | (0.01,0.05) | (0.02,0.05)        | (0.03,0.05)        | <b>(0.04,0.3)</b>  | (0.05,0.05)        |               |
|          | %          | 19.9        | 19.5               | 2.2                | 44.4               | 14                 | 100           |
|          | N          | 7.53        | 7.15               | 5.87               | 4.54               | 4.16               | 29.24         |
|          | $(D, R)$   | (0.08,0.38) | (0.14,0.38)        | (0.17,0.31)        | (0.17,1.38)        | (0.2,0.23)         | (0.77,2.67)   |
| 15       | $(p, q)$   | (0.01,0.05) | (0.02,0.05)        | (0.03,0.05)        | (0.04,0.05)        | <b>(0.05,0.3)</b>  |               |
|          | %          | 19.8        | 20.4               | 14.6               | 1.3                | 43.9               | 100           |
|          | N          | 7.48        | 7.04               | 5.76               | 4.38               | 3.47               | 28.12         |
|          | $(D, R)$   | (0.07,0.39) | (0.12,0.36)        | (0.17,0.29)        | (0.18,0.23)        | (0.2,1.05)         | (0.74,2.32)   |

Table 19: Simulation results using the parametric model. Cohort size 7 and maximum size 14 for each dose level.  $r^{(l)} = 10$ .  $\mathcal{C}_1 = 0.75$

| Scenario | Dose Level |             |                    |                    |                    | Total              |              |
|----------|------------|-------------|--------------------|--------------------|--------------------|--------------------|--------------|
|          | 1          | 2           | 3                  | 4                  | 5                  |                    |              |
| 1        | $(p, q)$   | (0.01,0.05) | (0.02,0.2)         | (0.03,0.35)        | (0.04,0.6)         | <b>(0.05,0.8)</b>  |              |
|          | %          | 6.9         | 7.5                | 3.4                | 4.8                | 77.4               | 100          |
|          | N          | 7.48        | 7.17               | 6.8                | 6.2                | 6.17               | 33.82        |
|          | (D,R)      | (0.07,0.4)  | (0.15,1.45)        | (0.2,2.38)         | (0.25,3.77)        | (0.31,4.94)        | (0.97,12.93) |
| 2        | $(p, q)$   | (0.01,0.57) | (0.03,0.58)        | (0.06,0.6)         | <b>(0.2,0.62)</b>  | (0.32,0.64)        |              |
|          | %          | 20.2        | 20.7               | 16.2               | 23.4               | 19.5               | 100          |
|          | N          | 7.52        | 7.22               | 6.34               | 6.45               | 4.67               | 32.19        |
|          | (D,R)      | (0.08,4.26) | (0.23,4.18)        | (0.39,3.72)        | (1.29,3.97)        | (1.53,2.98)        | (3.53,19.11) |
| 3        | $(p, q)$   | (0.02,0.2)  | (0.03,0.4)         | (0.04,0.6)         | (0.06,0.68)        | <b>(0.2,0.74)</b>  |              |
|          | %          | 4.6         | 5                  | 13.1               | 15.3               | 62                 | 100          |
|          | N          | 7.85        | 7.41               | 7.23               | 7.06               | 9.11               | 38.65        |
|          | (D,R)      | (0.15,1.5)  | (0.21,2.95)        | (0.32,4.37)        | (0.42,4.81)        | (1.79,6.72)        | (2.89,20.35) |
| 4        | $(p, q)$   | (0.01,0.52) | (0.01,0.62)        | (0.02,0.71)        | (0.03,0.79)        | <b>(0.03,0.86)</b> |              |
|          | %          | 10.5        | 11.1               | 12.8               | 12.2               | 53.4               | 100          |
|          | N          | 7.44        | 7.08               | 6.41               | 5.52               | 4.68               | 31.13        |
|          | (D,R)      | (0.07,3.91) | (0.12,4.4)         | (0.13,4.62)        | (0.13,4.37)        | (0.16,4.01)        | (0.6,21.3)   |
| 5        | $(p, q)$   | (0.18,0.05) | (0.22,0.2)         | <b>(0.26,0.35)</b> | (0.3,0.47)         | (0.33,0.58)        |              |
|          | %          | 7.8         | 12.3               | 17.4               | 17.2               | 33.9               | 88.6         |
|          | N          | 11.59       | 11.14              | 10.54              | 8.69               | 6.13               | 48.1         |
|          | (D,R)      | (2.12,0.59) | (2.46,2.27)        | (2.72,3.7)         | (2.57,4.12)        | (2.04,3.59)        | (11.9,14.27) |
| 6        | $(p, q)$   | (0.08,0.15) | (0.18,0.38)        | <b>(0.25,0.52)</b> | (0.3,0.59)         | (0.35,0.62)        |              |
|          | %          | 5.7         | 16.8               | 27.1               | 27.4               | 22.5               | 99.5         |
|          | N          | 10.02       | 11.13              | 11.51              | 9.16               | 5.37               | 47.18        |
|          | (D,R)      | (0.79,1.48) | (1.98,4.26)        | (2.84,6.04)        | (2.78,5.38)        | (1.84,3.33)        | (10.23,20.5) |
| 7        | $(p, q)$   | (0.01,0.05) | <b>(0.02,0.25)</b> | <b>(0.03,0.25)</b> | <b>(0.04,0.25)</b> | <b>(0.05,0.25)</b> |              |
|          | %          | 3.3         | 23.3               | 19.9               | 14.8               | 38.7               | 100          |
|          | N          | 7.59        | 7.15               | 7.04               | 5.26               | 3.95               | 30.99        |
|          | (D,R)      | (0.09,0.39) | (0.11,1.78)        | (0.21,1.73)        | (0.2,1.27)         | (0.2,0.98)         | (0.81,6.15)  |
| 8        | $(p, q)$   | (0.01,0.05) | (0.02,0.25)        | <b>(0.03,0.4)</b>  | <b>(0.04,0.4)</b>  | <b>(0.05,0.4)</b>  |              |
|          | %          | 4.4         | 7.7                | 21.2               | 18.6               | 48.1               | 100          |
|          | N          | 7.44        | 7.16               | 7.01               | 6.47               | 5                  | 33.08        |
|          | (D,R)      | (0.07,0.35) | (0.16,1.75)        | (0.18,2.86)        | (0.29,2.61)        | (0.24,1.96)        | (0.94,9.54)  |
| 9        | $(p, q)$   | (0.01,0.05) | (0.02,0.25)        | (0.03,0.4)         | <b>(0.04,0.6)</b>  | <b>(0.05,0.6)</b>  |              |
|          | %          | 3.7         | 7.6                | 5.9                | 19.3               | 63.5               | 100          |
|          | N          | 7.54        | 7.13               | 7.13               | 6.39               | 6.2                | 34.38        |
|          | (D,R)      | (0.08,0.36) | (0.14,1.8)         | (0.22,2.85)        | (0.26,3.82)        | (0.33,3.68)        | (1.03,12.51) |
| 10       | $(p, q)$   | (0.01,0.05) | <b>(0.02,0.25)</b> | (0.03,0.05)        | (0.04,0.05)        | (0.05,0.05)        |              |
|          | %          | 4           | 67.4               | 13.8               | 5.6                | 9.2                | 100          |
|          | N          | 7.53        | 7.14               | 6.92               | 2.04               | 1.11               | 24.72        |
|          | (D,R)      | (0.08,0.38) | (0.15,1.77)        | (0.22,0.36)        | (0.07,0.1)         | (0.05,0.06)        | (0.57,2.67)  |
| 11       | $(p, q)$   | (0.01,0.05) | (0.02,0.2)         | <b>(0.03,0.4)</b>  | (0.04,0.15)        | (0.05,0.15)        |              |
|          | %          | 5           | 5.2                | 56.9               | 14.9               | 18                 | 100          |
|          | N          | 7.55        | 7.11               | 7.01               | 6.39               | 2.48               | 30.53        |
|          | (D,R)      | (0.08,0.39) | (0.14,1.49)        | (0.2,2.84)         | (0.26,0.99)        | (0.13,0.34)        | (0.81,6.05)  |
| 12       | $(p, q)$   | (0.01,0.05) | (0.02,0.2)         | (0.03,0.3)         | <b>(0.04,0.6)</b>  | (0.05,0.3)         |              |
|          | %          | 6.2         | 11.8               | 2                  | 52.7               | 27.3               | 100          |
|          | N          | 7.43        | 7.17               | 6.86               | 6.06               | 5.83               | 33.36        |
|          | (D,R)      | (0.07,0.36) | (0.14,1.39)        | (0.2,2.08)         | (0.26,3.66)        | (0.3,1.79)         | (0.98,9.28)  |
| 13       | $(p, q)$   | (0.01,0.05) | (0.02,0.05)        | <b>(0.03,0.3)</b>  | (0.04,0.05)        | (0.05,0.05)        |              |
|          | %          | 20.1        | 3.4                | 57.4               | 11.6               | 7.5                | 100          |
|          | N          | 7.46        | 7.14               | 5.84               | 5.43               | 1.39               | 27.26        |
|          | (D,R)      | (0.08,0.4)  | (0.14,0.38)        | (0.16,1.71)        | (0.22,0.28)        | (0.08,0.06)        | (0.67,2.82)  |
| 14       | $(p, q)$   | (0.01,0.05) | (0.02,0.05)        | (0.03,0.05)        | <b>(0.04,0.3)</b>  | (0.05,0.05)        |              |
|          | %          | 22.1        | 21.2               | 1.8                | 42.3               | 12.6               | 100          |
|          | N          | 7.45        | 7.1                | 5.66               | 4.11               | 3.95               | 28.26        |
|          | (D,R)      | (0.07,0.38) | (0.12,0.33)        | (0.18,0.28)        | (0.16,1.23)        | (0.2,0.2)          | (0.74,2.41)  |
| 15       | $(p, q)$   | (0.01,0.05) | (0.02,0.05)        | (0.03,0.05)        | (0.04,0.05)        | <b>(0.05,0.3)</b>  |              |
|          | %          | 18.9        | 20.4               | 16.7               | 2                  | 42                 | 100          |
|          | N          | 7.55        | 7.18               | 5.96               | 4.4                | 3.34               | 28.43        |
|          | (D,R)      | (0.09,0.35) | (0.16,0.35)        | (0.17,0.32)        | (0.17,0.22)        | (0.19,1.03)        | (0.77,2.26)  |

Table 20: Simulation results using the parametric+ model. Cohort size 7 and maximum size 14 for each dose level.  $r^{(l)} = 10$ .  $\mathcal{C}_1 = 0.75$

### 3.5 $\mathcal{C}_2 = 0.75$

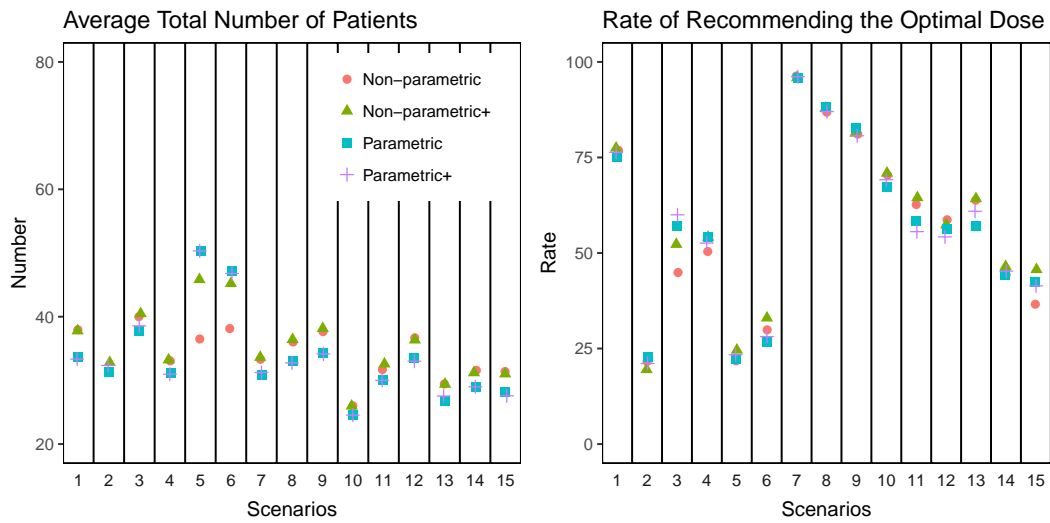

Figure 6: Average total number of patients and the average rate of reporting the optimal dose levels(s) for Scenarios 1-15.

| Scenario | Dose Level |             |                    |                    |                    | Total              |              |
|----------|------------|-------------|--------------------|--------------------|--------------------|--------------------|--------------|
|          | 1          | 2           | 3                  | 4                  | 5                  |                    |              |
| 1        | $(p, q)$   | (0.01,0.05) | (0.02,0.2)         | (0.03,0.35)        | (0.04,0.6)         | <b>(0.05,0.8)</b>  |              |
|          | %          | 6.9         | 7.9                | 3.6                | 4.7                | 76.9               | 100          |
|          | N          | 7.5         | 8.06               | 7.71               | 7.32               | 7.38               | 37.95        |
|          | $(D,R)$    | (0.08,0.38) | (0.15,1.56)        | (0.22,2.69)        | (0.29,4.33)        | (0.37,5.88)        | (1.12,14.85) |
| 2        | $(p, q)$   | (0.01,0.57) | (0.03,0.58)        | (0.06,0.6)         | <b>(0.2,0.62)</b>  | (0.32,0.64)        |              |
|          | %          | 22.9        | 18.7               | 27.9               | 21.6               | 8.9                | 100          |
|          | N          | 7.48        | 7.95               | 6.94               | 6                  | 2.87               | 31.25        |
|          | $(D,R)$    | (0.07,4.23) | (0.22,4.58)        | (0.41,4.22)        | (1.23,3.73)        | (0.96,1.86)        | (2.9,18.63)  |
| 3        | $(p, q)$   | (0.02,0.2)  | (0.03,0.4)         | (0.04,0.6)         | (0.06,0.68)        | <b>(0.2,0.74)</b>  |              |
|          | %          | 5.4         | 6.2                | 16.4               | 27.1               | 44.9               | 100          |
|          | N          | 8.05        | 8.32               | 8.18               | 7.99               | 7.47               | 40.01        |
|          | $(D,R)$    | (0.19,1.64) | (0.25,3.32)        | (0.35,4.95)        | (0.49,5.43)        | (1.46,5.54)        | (2.74,20.88) |
| 4        | $(p, q)$   | (0.01,0.52) | (0.01,0.62)        | (0.02,0.71)        | (0.03,0.79)        | <b>(0.03,0.86)</b> |              |
|          | %          | 12.3        | 12.3               | 13.5               | 11.5               | 50.4               | 100          |
|          | N          | 7.5         | 7.74               | 6.92               | 5.89               | 5.01               | 33.06        |
|          | $(D,R)$    | (0.08,3.93) | (0.14,4.79)        | (0.14,4.94)        | (0.14,4.64)        | (0.14,4.29)        | (0.63,22.59) |
| 5        | $(p, q)$   | (0.18,0.05) | (0.22,0.2)         | <b>(0.26,0.35)</b> | (0.3,0.47)         | (0.33,0.58)        |              |
|          | %          | 21.1        | 25.5               | 21.8               | 12                 | 9.6                | 90           |
|          | N          | 11.54       | 10.49              | 7.67               | 4.59               | 2.2                | 36.5         |
|          | $(D,R)$    | (2.1,0.53)  | (2.34,2.08)        | (1.97,2.65)        | (1.36,2.14)        | (0.7,1.24)         | (8.47,8.64)  |
| 6        | $(p, q)$   | (0.08,0.15) | (0.18,0.38)        | <b>(0.25,0.52)</b> | (0.3,0.59)         | (0.35,0.62)        |              |
|          | %          | 15.4        | 30.4               | 29.9               | 17.3               | 6                  | 99           |
|          | N          | 10.03       | 11.43              | 9.21               | 5.36               | 2.09               | 38.13        |
|          | $(D,R)$    | (0.81,1.55) | (2.13,4.42)        | (2.24,4.73)        | (1.64,3.16)        | (0.72,1.29)        | (7.55,15.15) |
| 7        | $(p, q)$   | (0.01,0.05) | <b>(0.02,0.25)</b> | <b>(0.03,0.25)</b> | <b>(0.04,0.25)</b> | <b>(0.05,0.25)</b> |              |
|          | %          | 3.7         | 25.6               | 22.3               | 14.5               | 33.9               | 100          |
|          | N          | 7.53        | 8.02               | 7.69               | 5.89               | 4.18               | 33.31        |
|          | $(D,R)$    | (0.09,0.41) | (0.15,2.05)        | (0.21,1.86)        | (0.22,1.44)        | (0.21,1.08)        | (0.87,6.84)  |
| 8        | $(p, q)$   | (0.01,0.05) | (0.02,0.25)        | <b>(0.03,0.4)</b>  | <b>(0.04,0.4)</b>  | <b>(0.05,0.4)</b>  |              |
|          | %          | 4.3         | 8.8                | 23.5               | 18.8               | 44.6               | 100          |
|          | N          | 7.49        | 8.12               | 7.82               | 7.17               | 5.43               | 36.03        |
|          | $(D,R)$    | (0.08,0.4)  | (0.17,2.03)        | (0.23,3.14)        | (0.28,2.81)        | (0.28,2.2)         | (1.04,10.58) |
| 9        | $(p, q)$   | (0.01,0.05) | (0.02,0.25)        | (0.03,0.4)         | <b>(0.04,0.6)</b>  | <b>(0.05,0.6)</b>  |              |
|          | %          | 5.2         | 8                  | 5.7                | 23.5               | 57.6               | 100          |
|          | N          | 7.42        | 8.1                | 7.85               | 7.38               | 6.89               | 37.65        |
|          | $(D,R)$    | (0.07,0.41) | (0.17,1.99)        | (0.24,3.2)         | (0.28,4.51)        | (0.34,4.1)         | (1.1,14.2)   |
| 10       | $(p, q)$   | (0.01,0.05) | <b>(0.02,0.25)</b> | (0.03,0.05)        | (0.04,0.05)        | (0.05,0.05)        |              |
|          | %          | 4.1         | 70.4               | 14.9               | 5.2                | 5.4                | 100          |
|          | N          | 7.53        | 8                  | 7.27               | 2.19               | 1                  | 26           |
|          | $(D,R)$    | (0.09,0.4)  | (0.15,2.01)        | (0.23,0.37)        | (0.08,0.1)         | (0.06,0.06)        | (0.59,2.93)  |
| 11       | $(p, q)$   | (0.01,0.05) | (0.02,0.2)         | <b>(0.03,0.4)</b>  | (0.04,0.15)        | (0.05,0.15)        |              |
|          | %          | 6           | 7.2                | 62.7               | 10.8               | 13.3               | 100          |
|          | N          | 7.41        | 8.02               | 7.73               | 6.54               | 2                  | 31.7         |
|          | $(D,R)$    | (0.06,0.36) | (0.15,1.57)        | (0.23,3.12)        | (0.26,0.95)        | (0.08,0.28)        | (0.79,6.27)  |
| 12       | $(p, q)$   | (0.01,0.05) | (0.02,0.2)         | (0.03,0.3)         | <b>(0.04,0.6)</b>  | (0.05,0.3)         |              |
|          | %          | 4.9         | 11.9               | 3.5                | 58.7               | 20.9               | 99.9         |
|          | N          | 7.46        | 8.06               | 7.86               | 7.22               | 6.08               | 36.68        |
|          | $(D,R)$    | (0.08,0.38) | (0.15,1.57)        | (0.24,2.41)        | (0.3,4.34)         | (0.29,1.76)        | (1.05,10.47) |
| 13       | $(p, q)$   | (0.01,0.05) | (0.02,0.05)        | <b>(0.03,0.3)</b>  | (0.04,0.05)        | (0.05,0.05)        |              |
|          | %          | 21.3        | 2.7                | 63.8               | 7.7                | 4.5                | 100          |
|          | N          | 7.48        | 8.54               | 6.64               | 5.73               | 1.04               | 29.43        |
|          | $(D,R)$    | (0.07,0.38) | (0.16,0.44)        | (0.2,2.03)         | (0.22,0.28)        | (0.05,0.06)        | (0.71,3.19)  |
| 14       | $(p, q)$   | (0.01,0.05) | (0.02,0.05)        | (0.03,0.05)        | <b>(0.04,0.3)</b>  | (0.05,0.05)        |              |
|          | %          | 22.7        | 22.6               | 2.3                | 44.2               | 8.2                | 100          |
|          | N          | 7.49        | 8.57               | 6.74               | 4.77               | 4                  | 31.58        |
|          | $(D,R)$    | (0.08,0.38) | (0.22,0.44)        | (0.21,0.37)        | (0.19,1.48)        | (0.21,0.2)         | (0.91,2.88)  |
| 15       | $(p, q)$   | (0.01,0.05) | (0.02,0.05)        | (0.03,0.05)        | (0.04,0.05)        | <b>(0.05,0.3)</b>  |              |
|          | %          | 23          | 20.4               | 19                 | 1                  | 36.6               | 100          |
|          | N          | 7.45        | 8.48               | 6.81               | 5.26               | 3.38               | 31.38        |
|          | $(D,R)$    | (0.07,0.4)  | (0.17,0.4)         | (0.19,0.35)        | (0.21,0.25)        | (0.14,1.02)        | (0.78,2.42)  |

Table 21: Simulation results using the non-parametric model. Cohort size 7 and maximum size 14 for each dose level.  $r^{(l)} = 10$ .  $\mathcal{C}_2 = 0.75$

| Scenario | Dose Level |             |                    |                    |                    | Total              |              |
|----------|------------|-------------|--------------------|--------------------|--------------------|--------------------|--------------|
|          | 1          | 2           | 3                  | 4                  | 5                  |                    |              |
| 1        | $(p, q)$   | (0.01,0.05) | (0.02,0.2)         | (0.03,0.35)        | (0.04,0.6)         | <b>(0.05,0.8)</b>  |              |
|          | %          | 7.1         | 7.3                | 3.2                | 4.9                | 77.5               | 100          |
|          | N          | 7.38        | 7.92               | 7.74               | 7.38               | 7.36               | 37.79        |
|          | $(D,R)$    | (0.06,0.37) | (0.17,1.54)        | (0.24,2.71)        | (0.28,4.42)        | (0.36,5.89)        | (1.11,14.94) |
| 2        | $(p, q)$   | (0.01,0.57) | (0.03,0.58)        | (0.06,0.6)         | <b>(0.2,0.62)</b>  | (0.32,0.64)        |              |
|          | %          | 22.2        | 22.1               | 19.9               | 19.5               | 16.3               | 100          |
|          | N          | 7.41        | 8.18               | 7.01               | 6.27               | 3.93               | 32.81        |
|          | $(D,R)$    | (0.06,4.24) | (0.25,4.76)        | (0.45,4.18)        | (1.19,3.86)        | (1.21,2.51)        | (3.16,19.54) |
| 3        | $(p, q)$   | (0.02,0.2)  | (0.03,0.4)         | (0.04,0.6)         | (0.06,0.68)        | <b>(0.2,0.74)</b>  |              |
|          | %          | 7           | 6.2                | 14.5               | 20                 | 52.3               | 100          |
|          | N          | 7.95        | 8.29               | 8.03               | 8.01               | 8.2                | 40.48        |
|          | $(D,R)$    | (0.16,1.63) | (0.25,3.31)        | (0.3,4.85)         | (0.49,5.45)        | (1.61,6.06)        | (2.81,21.3)  |
| 4        | $(p, q)$   | (0.01,0.52) | (0.01,0.62)        | (0.02,0.71)        | (0.03,0.79)        | <b>(0.03,0.86)</b> |              |
|          | %          | 11.6        | 12.2               | 12.2               | 9.9                | 54.1               | 100          |
|          | N          | 7.42        | 7.61               | 6.89               | 6.08               | 5.22               | 33.22        |
|          | $(D,R)$    | (0.06,3.88) | (0.12,4.7)         | (0.14,4.87)        | (0.14,4.77)        | (0.15,4.51)        | (0.61,22.72) |
| 5        | $(p, q)$   | (0.18,0.05) | (0.22,0.2)         | <b>(0.26,0.35)</b> | (0.3,0.47)         | (0.33,0.58)        |              |
|          | %          | 12.5        | 21.7               | 24.6               | 17.5               | 19.7               | 96           |
|          | N          | 12.29       | 11.71              | 10.12              | 7.47               | 4.25               | 45.84        |
|          | $(D,R)$    | (2.22,0.61) | (2.61,2.41)        | (2.61,3.53)        | (2.28,3.54)        | (1.38,2.45)        | (11.1,12.54) |
| 6        | $(p, q)$   | (0.08,0.15) | (0.18,0.38)        | <b>(0.25,0.52)</b> | (0.3,0.59)         | (0.35,0.62)        |              |
|          | %          | 9.7         | 21                 | 33                 | 23.8               | 12.4               | 99.9         |
|          | N          | 10.12       | 11.92              | 11.19              | 8                  | 3.98               | 45.21        |
|          | $(D,R)$    | (0.82,1.5)  | (2.19,4.49)        | (2.81,5.89)        | (2.47,4.74)        | (1.38,2.41)        | (9.67,19.03) |
| 7        | $(p, q)$   | (0.01,0.05) | <b>(0.02,0.25)</b> | <b>(0.03,0.25)</b> | <b>(0.04,0.25)</b> | <b>(0.05,0.25)</b> |              |
|          | %          | 4.1         | 22.2               | 24.2               | 15.4               | 34.1               | 100          |
|          | N          | 7.41        | 7.84               | 7.78               | 6.2                | 4.4                | 33.62        |
|          | $(D,R)$    | (0.07,0.38) | (0.15,1.96)        | (0.22,1.99)        | (0.24,1.54)        | (0.23,1.09)        | (0.9,6.97)   |
| 8        | $(p, q)$   | (0.01,0.05) | (0.02,0.25)        | <b>(0.03,0.4)</b>  | <b>(0.04,0.4)</b>  | <b>(0.05,0.4)</b>  |              |
|          | %          | 3.8         | 8.3                | 22.5               | 17.6               | 47.8               | 100          |
|          | N          | 7.41        | 7.88               | 8.04               | 7.34               | 5.74               | 36.41        |
|          | $(D,R)$    | (0.06,0.37) | (0.15,1.93)        | (0.24,3.22)        | (0.29,2.89)        | (0.28,2.29)        | (1.03,10.7)  |
| 9        | $(p, q)$   | (0.01,0.05) | (0.02,0.25)        | (0.03,0.4)         | <b>(0.04,0.6)</b>  | <b>(0.05,0.6)</b>  |              |
|          | %          | 4.3         | 8.2                | 6.1                | 21.8               | 59.6               | 100          |
|          | N          | 7.5         | 7.87               | 8.08               | 7.57               | 7.14               | 38.16        |
|          | $(D,R)$    | (0.08,0.36) | (0.15,1.91)        | (0.27,3.23)        | (0.29,4.52)        | (0.36,4.29)        | (1.14,14.3)  |
| 10       | $(p, q)$   | (0.01,0.05) | <b>(0.02,0.25)</b> | (0.03,0.05)        | (0.04,0.05)        | (0.05,0.05)        |              |
|          | %          | 3.5         | 70.9               | 11.6               | 4.2                | 9.8                | 100          |
|          | N          | 7.42        | 7.9                | 7.31               | 2.16               | 1.19               | 25.97        |
|          | $(D,R)$    | (0.06,0.38) | (0.15,2.02)        | (0.24,0.36)        | (0.1,0.12)         | (0.06,0.06)        | (0.61,2.94)  |
| 11       | $(p, q)$   | (0.01,0.05) | (0.02,0.2)         | <b>(0.03,0.4)</b>  | (0.04,0.15)        | (0.05,0.15)        |              |
|          | %          | 5           | 5.6                | 64.5               | 11.1               | 13.8               | 100          |
|          | N          | 7.45        | 7.97               | 7.95               | 7.07               | 2.15               | 32.59        |
|          | $(D,R)$    | (0.07,0.36) | (0.17,1.66)        | (0.25,3.17)        | (0.29,1.06)        | (0.11,0.33)        | (0.88,6.58)  |
| 12       | $(p, q)$   | (0.01,0.05) | (0.02,0.2)         | (0.03,0.3)         | <b>(0.04,0.6)</b>  | (0.05,0.3)         |              |
|          | %          | 5.4         | 13.7               | 3                  | 57.4               | 20.5               | 100          |
|          | N          | 7.51        | 7.85               | 7.71               | 7.15               | 6.14               | 36.35        |
|          | $(D,R)$    | (0.08,0.36) | (0.14,1.58)        | (0.22,2.27)        | (0.3,4.34)         | (0.35,1.9)         | (1.08,10.44) |
| 13       | $(p, q)$   | (0.01,0.05) | (0.02,0.05)        | <b>(0.03,0.3)</b>  | (0.04,0.05)        | (0.05,0.05)        |              |
|          | %          | 19.2        | 1.7                | 64.2               | 7                  | 7.9                | 100          |
|          | N          | 7.6         | 7.81               | 6.72               | 6.03               | 1.24               | 29.4         |
|          | $(D,R)$    | (0.09,0.38) | (0.16,0.4)         | (0.2,2.05)         | (0.25,0.3)         | (0.06,0.07)        | (0.76,3.19)  |
| 14       | $(p, q)$   | (0.01,0.05) | (0.02,0.05)        | (0.03,0.05)        | <b>(0.04,0.3)</b>  | (0.05,0.05)        |              |
|          | %          | 21          | 19.6               | 1.5                | 46.5               | 11.4               | 100          |
|          | N          | 7.43        | 7.83               | 6.36               | 5.15               | 4.43               | 31.21        |
|          | $(D,R)$    | (0.06,0.37) | (0.17,0.37)        | (0.19,0.28)        | (0.2,1.56)         | (0.2,0.21)         | (0.83,2.8)   |
| 15       | $(p, q)$   | (0.01,0.05) | (0.02,0.05)        | (0.03,0.05)        | (0.04,0.05)        | <b>(0.05,0.3)</b>  |              |
|          | %          | 20.5        | 18.5               | 14                 | 1.3                | 45.7               | 100          |
|          | N          | 7.55        | 7.8                | 6.41               | 5.02               | 4.25               | 31.02        |
|          | $(D,R)$    | (0.09,0.39) | (0.15,0.4)         | (0.18,0.31)        | (0.18,0.25)        | (0.21,1.31)        | (0.81,2.65)  |

Table 22: Simulation results using the non-parametric+ model. Cohort size 7 and maximum size 14 for each dose level.  $r^{(l)} = 10$ .  $\mathcal{C}_2 = 0.75$

| Scenario | Dose Level |             |                    |                    |                    | Total              |               |
|----------|------------|-------------|--------------------|--------------------|--------------------|--------------------|---------------|
|          | 1          | 2           | 3                  | 4                  | 5                  |                    |               |
| 1        | $(p, q)$   | (0.01,0.05) | (0.02,0.2)         | (0.03,0.35)        | (0.04,0.6)         | <b>(0.05,0.8)</b>  |               |
|          | %          | 6.5         | 9.2                | 4                  | 5.3                | 75                 | 100           |
|          | N          | 7.37        | 7.16               | 6.87               | 6.18               | 6.06               | 33.64         |
|          | $(D,R)$    | (0.06,0.34) | (0.15,1.4)         | (0.21,2.41)        | (0.26,3.71)        | (0.3,4.89)         | (0.98,12.74)  |
| 2        | $(p, q)$   | (0.01,0.57) | (0.03,0.58)        | (0.06,0.6)         | <b>(0.2,0.62)</b>  | (0.32,0.64)        |               |
|          | %          | 21.9        | 20.4               | 17                 | 22.7               | 18                 | 100           |
|          | N          | 7.41        | 7.18               | 6.08               | 6.33               | 4.3                | 31.31         |
|          | $(D,R)$    | (0.06,4.29) | (0.22,4.13)        | (0.34,3.6)         | (1.33,3.98)        | (1.37,2.77)        | (3.31,18.76)  |
| 3        | $(p, q)$   | (0.02,0.2)  | (0.03,0.4)         | (0.04,0.6)         | (0.06,0.68)        | <b>(0.2,0.74)</b>  |               |
|          | %          | 5.8         | 6                  | 13.5               | 17.6               | 57.1               | 100           |
|          | N          | 7.78        | 7.37               | 7.12               | 6.86               | 8.66               | 37.79         |
|          | $(D,R)$    | (0.13,1.59) | (0.22,2.95)        | (0.28,4.22)        | (0.44,4.65)        | (1.76,6.37)        | (2.83,19.79)  |
| 4        | $(p, q)$   | (0.01,0.52) | (0.01,0.62)        | (0.02,0.71)        | (0.03,0.79)        | <b>(0.03,0.86)</b> |               |
|          | %          | 10.9        | 12.3               | 10.6               | 11.9               | 54.3               | 100           |
|          | N          | 7.52        | 7.11               | 6.38               | 5.43               | 4.7                | 31.13         |
|          | $(D,R)$    | (0.08,3.92) | (0.1,4.41)         | (0.13,4.48)        | (0.14,4.27)        | (0.15,4.08)        | (0.59,21.16)  |
| 5        | $(p, q)$   | (0.18,0.05) | (0.22,0.2)         | <b>(0.26,0.35)</b> | (0.3,0.47)         | (0.33,0.58)        |               |
|          | %          | 8.2         | 15.8               | 22.3               | 18.9               | 30.7               | 95.9          |
|          | N          | 12.17       | 12.11              | 11.29              | 8.86               | 5.92               | 50.35         |
|          | $(D,R)$    | (2.19,0.61) | (2.65,2.45)        | (2.86,3.97)        | (2.58,4.11)        | (1.95,3.43)        | (12.22,14.57) |
| 6        | $(p, q)$   | (0.08,0.15) | (0.18,0.38)        | <b>(0.25,0.52)</b> | (0.3,0.59)         | (0.35,0.62)        |               |
|          | %          | 5.4         | 18.2               | 26.6               | 28.4               | 21.1               | 99.7          |
|          | N          | 9.74        | 11.24              | 11.69              | 9.17               | 5.28               | 47.12         |
|          | $(D,R)$    | (0.72,1.45) | (2.01,4.27)        | (2.94,6.06)        | (2.74,5.43)        | (1.85,3.27)        | (10.26,20.47) |
| 7        | $(p, q)$   | (0.01,0.05) | <b>(0.02,0.25)</b> | <b>(0.03,0.25)</b> | <b>(0.04,0.25)</b> | <b>(0.05,0.25)</b> |               |
|          | %          | 4.2         | 21.3               | 20                 | 17.6               | 36.9               | 100           |
|          | N          | 7.45        | 7.11               | 6.94               | 5.35               | 4                  | 30.86         |
|          | $(D,R)$    | (0.07,0.37) | (0.14,1.77)        | (0.19,1.69)        | (0.22,1.34)        | (0.21,0.99)        | (0.84,6.15)   |
| 8        | $(p, q)$   | (0.01,0.05) | (0.02,0.25)        | <b>(0.03,0.4)</b>  | <b>(0.04,0.4)</b>  | <b>(0.05,0.4)</b>  |               |
|          | %          | 3.7         | 8.2                | 21                 | 19.1               | 48                 | 100           |
|          | N          | 7.46        | 7.17               | 7.06               | 6.38               | 4.96               | 33.03         |
|          | $(D,R)$    | (0.07,0.34) | (0.16,1.84)        | (0.22,2.84)        | (0.25,2.53)        | (0.26,2)           | (0.95,9.54)   |
| 9        | $(p, q)$   | (0.01,0.05) | (0.02,0.25)        | (0.03,0.4)         | <b>(0.04,0.6)</b>  | <b>(0.05,0.6)</b>  |               |
|          | %          | 2.8         | 8.2                | 6.2                | 20.3               | 62.5               | 100           |
|          | N          | 7.34        | 7.16               | 7.18               | 6.48               | 6.07               | 34.23         |
|          | $(D,R)$    | (0.05,0.35) | (0.15,1.82)        | (0.23,2.91)        | (0.25,3.8)         | (0.3,3.68)         | (0.99,12.57)  |
| 10       | $(p, q)$   | (0.01,0.05) | <b>(0.02,0.25)</b> | (0.03,0.05)        | (0.04,0.05)        | (0.05,0.05)        |               |
|          | %          | 4           | 67.4               | 15                 | 6.9                | 6.7                | 100           |
|          | N          | 7.46        | 7.14               | 6.85               | 2.08               | 0.97               | 24.51         |
|          | $(D,R)$    | (0.07,0.4)  | (0.14,1.81)        | (0.18,0.35)        | (0.08,0.11)        | (0.04,0.04)        | (0.51,2.7)    |
| 11       | $(p, q)$   | (0.01,0.05) | (0.02,0.2)         | <b>(0.03,0.4)</b>  | (0.04,0.15)        | (0.05,0.15)        |               |
|          | %          | 6.4         | 4.3                | 58.5               | 14                 | 16.8               | 100           |
|          | N          | 7.44        | 7.15               | 6.89               | 6.34               | 2.28               | 30.09         |
|          | $(D,R)$    | (0.07,0.38) | (0.14,1.42)        | (0.2,2.78)         | (0.26,0.95)        | (0.13,0.34)        | (0.8,5.87)    |
| 12       | $(p, q)$   | (0.01,0.05) | (0.02,0.2)         | (0.03,0.3)         | <b>(0.04,0.6)</b>  | (0.05,0.3)         |               |
|          | %          | 5.4         | 11.5               | 1.9                | 56.4               | 24.8               | 100           |
|          | N          | 7.47        | 7.17               | 6.94               | 6.05               | 5.87               | 33.5          |
|          | $(D,R)$    | (0.07,0.34) | (0.14,1.43)        | (0.2,2.1)          | (0.26,3.64)        | (0.28,1.69)        | (0.94,9.2)    |
| 13       | $(p, q)$   | (0.01,0.05) | (0.02,0.05)        | <b>(0.03,0.3)</b>  | (0.04,0.05)        | (0.05,0.05)        |               |
|          | %          | 23.8        | 2.4                | 57                 | 8.9                | 7.9                | 100           |
|          | N          | 7.5         | 7.15               | 5.66               | 5.26               | 1.25               | 26.83         |
|          | $(D,R)$    | (0.08,0.41) | (0.15,0.33)        | (0.2,1.65)         | (0.22,0.26)        | (0.06,0.06)        | (0.72,2.72)   |
| 14       | $(p, q)$   | (0.01,0.05) | (0.02,0.05)        | (0.03,0.05)        | <b>(0.04,0.3)</b>  | (0.05,0.05)        |               |
|          | %          | 21.1        | 20.2               | 1.9                | 44.2               | 12.6               | 100           |
|          | N          | 7.47        | 7.15               | 5.87               | 4.4                | 4.05               | 28.94         |
|          | $(D,R)$    | (0.08,0.34) | (0.14,0.34)        | (0.19,0.29)        | (0.17,1.32)        | (0.22,0.18)        | (0.8,2.48)    |
| 15       | $(p, q)$   | (0.01,0.05) | (0.02,0.05)        | (0.03,0.05)        | (0.04,0.05)        | <b>(0.05,0.3)</b>  |               |
|          | %          | 18.7        | 22.1               | 15.3               | 1.5                | 42.4               | 100           |
|          | N          | 7.54        | 7.11               | 5.94               | 4.28               | 3.31               | 28.19         |
|          | $(D,R)$    | (0.08,0.36) | (0.15,0.37)        | (0.18,0.27)        | (0.17,0.22)        | (0.18,1.03)        | (0.76,2.25)   |

Table 23: Simulation results using the parametric model. Cohort size 7 and maximum size 14 for each dose level.  $r^{(l)} = 10$ .  $\mathcal{C}_2 = 0.75$

| Scenario | Dose Level |             |                    |                    |                    | Total              |               |
|----------|------------|-------------|--------------------|--------------------|--------------------|--------------------|---------------|
|          | 1          | 2           | 3                  | 4                  | 5                  |                    |               |
| 1        | $(p, q)$   | (0.01,0.05) | (0.02,0.2)         | (0.03,0.35)        | (0.04,0.6)         | <b>(0.05,0.8)</b>  | 100           |
|          | %          | 7           | 9.3                | 3.3                | 4.1                | 76.3               | 33.35         |
|          | N          | 7.46        | 7.11               | 6.75               | 6.04               | 5.99               | 33.35         |
|          | (D,R)      | (0.07,0.39) | (0.14,1.38)        | (0.18,2.29)        | (0.25,3.62)        | (0.3,4.8)          | (0.93,12.48)  |
| 2        | $(p, q)$   | (0.01,0.57) | (0.03,0.58)        | (0.06,0.6)         | <b>(0.2,0.62)</b>  | (0.32,0.64)        | 100           |
|          | %          | 20.3        | 17.7               | 18.8               | 21.1               | 22.1               | 32.35         |
|          | N          | 7.47        | 7.19               | 6.15               | 6.71               | 4.84               | 32.35         |
|          | (D,R)      | (0.07,4.22) | (0.19,4.12)        | (0.37,3.7)         | (1.29,4.13)        | (1.51,3.12)        | (3.43,19.29)  |
| 3        | $(p, q)$   | (0.02,0.2)  | (0.03,0.4)         | (0.04,0.6)         | (0.06,0.68)        | <b>(0.2,0.74)</b>  | 100           |
|          | %          | 4.5         | 5.6                | 14.2               | 15.7               | 60                 | 38.56         |
|          | N          | 7.91        | 7.41               | 7.28               | 7.08               | 8.88               | 38.56         |
|          | (D,R)      | (0.16,1.57) | (0.22,3)           | (0.29,4.38)        | (0.42,4.74)        | (1.81,6.65)        | (2.9,20.33)   |
| 4        | $(p, q)$   | (0.01,0.52) | (0.01,0.62)        | (0.02,0.71)        | (0.03,0.79)        | <b>(0.03,0.86)</b> | 100           |
|          | %          | 11.7        | 13                 | 11.2               | 11.5               | 52.6               | 30.98         |
|          | N          | 7.58        | 7.14               | 6.34               | 5.36               | 4.56               | 30.98         |
|          | (D,R)      | (0.09,3.91) | (0.11,4.44)        | (0.14,4.5)         | (0.15,4.21)        | (0.13,3.9)         | (0.62,20.97)  |
| 5        | $(p, q)$   | (0.18,0.05) | (0.22,0.2)         | <b>(0.26,0.35)</b> | (0.3,0.47)         | (0.33,0.58)        | 95.9          |
|          | %          | 7           | 14.9               | 23.4               | 22.5               | 28.1               | 50.33         |
|          | N          | 11.91       | 12.03              | 11.43              | 9.01               | 5.95               | 50.33         |
|          | (D,R)      | (2.12,0.56) | (2.63,2.39)        | (3.04,4.03)        | (2.77,4.29)        | (1.99,3.45)        | (12.54,14.72) |
| 6        | $(p, q)$   | (0.08,0.15) | (0.18,0.38)        | <b>(0.25,0.52)</b> | (0.3,0.59)         | (0.35,0.62)        | 99.7          |
|          | %          | 7.6         | 17.1               | 28.1               | 28.1               | 18.8               | 46.78         |
|          | N          | 10.32       | 11.17              | 11.49              | 8.9                | 4.91               | 46.78         |
|          | (D,R)      | (0.87,1.54) | (1.97,4.17)        | (2.84,5.9)         | (2.71,5.27)        | (1.71,3.06)        | (10.1,19.95)  |
| 7        | $(p, q)$   | (0.01,0.05) | <b>(0.02,0.25)</b> | <b>(0.03,0.25)</b> | <b>(0.04,0.25)</b> | <b>(0.05,0.25)</b> | 100           |
|          | %          | 3.9         | 22                 | 16.2               | 16.9               | 41                 | 31.24         |
|          | N          | 7.46        | 7.15               | 7.02               | 5.33               | 4.28               | 31.24         |
|          | (D,R)      | (0.07,0.38) | (0.14,1.81)        | (0.2,1.7)          | (0.21,1.39)        | (0.2,1.05)         | (0.82,6.35)   |
| 8        | $(p, q)$   | (0.01,0.05) | (0.02,0.25)        | <b>(0.03,0.4)</b>  | <b>(0.04,0.4)</b>  | <b>(0.05,0.4)</b>  | 100           |
|          | %          | 3.8         | 9.2                | 18.7               | 16.7               | 51.6               | 32.76         |
|          | N          | 7.38        | 7.1                | 6.97               | 6.26               | 5.05               | 32.76         |
|          | (D,R)      | (0.06,0.34) | (0.14,1.78)        | (0.18,2.75)        | (0.27,2.46)        | (0.25,2.01)        | (0.9,9.34)    |
| 9        | $(p, q)$   | (0.01,0.05) | (0.02,0.25)        | (0.03,0.4)         | <b>(0.04,0.6)</b>  | <b>(0.05,0.6)</b>  | 100           |
|          | %          | 4.3         | 8.2                | 6.8                | 18.5               | 62.2               | 34.15         |
|          | N          | 7.5         | 7.13               | 7.07               | 6.39               | 6.05               | 34.15         |
|          | (D,R)      | (0.08,0.37) | (0.16,1.79)        | (0.21,2.86)        | (0.23,3.84)        | (0.31,3.66)        | (0.98,12.53)  |
| 10       | $(p, q)$   | (0.01,0.05) | <b>(0.02,0.25)</b> | (0.03,0.05)        | (0.04,0.05)        | (0.05,0.05)        | 100           |
|          | %          | 3.1         | 69.2               | 15.8               | 4.6                | 7.3                | 24.55         |
|          | N          | 7.51        | 7.21               | 6.95               | 1.97               | 0.91               | 24.55         |
|          | (D,R)      | (0.08,0.35) | (0.16,1.79)        | (0.19,0.34)        | (0.08,0.08)        | (0.06,0.04)        | (0.56,2.61)   |
| 11       | $(p, q)$   | (0.01,0.05) | (0.02,0.2)         | <b>(0.03,0.4)</b>  | (0.04,0.15)        | (0.05,0.15)        | 100           |
|          | %          | 6.9         | 5.8                | 55.6               | 14.4               | 17.3               | 30.01         |
|          | N          | 7.47        | 7.11               | 6.87               | 6.21               | 2.35               | 30.01         |
|          | (D,R)      | (0.08,0.39) | (0.14,1.46)        | (0.22,2.71)        | (0.27,0.97)        | (0.11,0.35)        | (0.81,5.89)   |
| 12       | $(p, q)$   | (0.01,0.05) | (0.02,0.2)         | (0.03,0.3)         | <b>(0.04,0.6)</b>  | (0.05,0.3)         | 100           |
|          | %          | 6.5         | 12.5               | 2.4                | 54.2               | 24.4               | 33.01         |
|          | N          | 7.45        | 7.13               | 6.8                | 5.93               | 5.7                | 33.01         |
|          | (D,R)      | (0.07,0.4)  | (0.13,1.38)        | (0.2,2.03)         | (0.28,3.54)        | (0.28,1.64)        | (0.96,9)      |
| 13       | $(p, q)$   | (0.01,0.05) | (0.02,0.05)        | <b>(0.03,0.3)</b>  | (0.04,0.05)        | (0.05,0.05)        | 100           |
|          | %          | 18.4        | 2.8                | 60.9               | 11.3               | 6.6                | 27.54         |
|          | N          | 7.48        | 7.16               | 6.01               | 5.58               | 1.31               | 27.54         |
|          | (D,R)      | (0.08,0.37) | (0.16,0.37)        | (0.19,1.8)         | (0.21,0.28)        | (0.06,0.05)        | (0.71,2.87)   |
| 14       | $(p, q)$   | (0.01,0.05) | (0.02,0.05)        | (0.03,0.05)        | <b>(0.04,0.3)</b>  | (0.05,0.05)        | 100           |
|          | %          | 18.6        | 22.9               | 1.8                | 45.3               | 11.4               | 28.99         |
|          | N          | 7.55        | 7.15               | 5.93               | 4.3                | 4.06               | 28.99         |
|          | (D,R)      | (0.09,0.35) | (0.16,0.39)        | (0.18,0.32)        | (0.17,1.34)        | (0.2,0.19)         | (0.79,2.58)   |
| 15       | $(p, q)$   | (0.01,0.05) | (0.02,0.05)        | (0.03,0.05)        | (0.04,0.05)        | <b>(0.05,0.3)</b>  | 100           |
|          | %          | 21.5        | 19.3               | 16.2               | 1.6                | 41.4               | 27.58         |
|          | N          | 7.41        | 7.1                | 5.68               | 4.23               | 3.16               | 27.58         |
|          | (D,R)      | (0.06,0.39) | (0.13,0.34)        | (0.16,0.29)        | (0.15,0.22)        | (0.17,0.98)        | (0.68,2.22)   |

Table 24: Simulation results using the parametric+ model. Cohort size 7 and maximum size 14 for each dose level.  $r^{(l)} = 10$ .  $\mathcal{C}_2 = 0.75$



3.6  $\mathcal{C}_3 = 0.55$

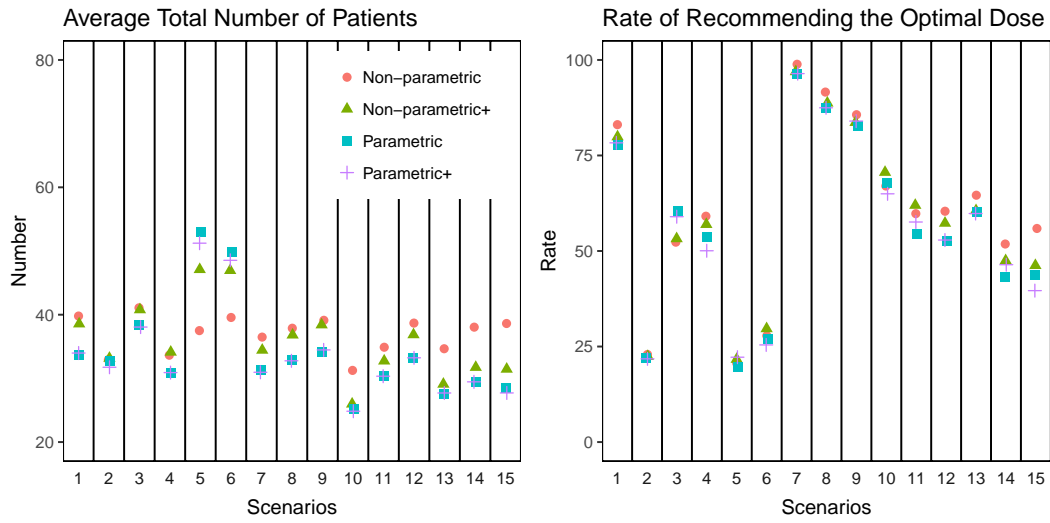

Figure 7: Average total number of patients and the average rate of reporting the optimal dose levels(s) for Scenarios 1-15.

| Scenario | Dose Level |             |                    |                    |                    | Total              |              |
|----------|------------|-------------|--------------------|--------------------|--------------------|--------------------|--------------|
|          | 1          | 2           | 3                  | 4                  | 5                  |                    |              |
| 1        | $(p, q)$   | (0.01,0.05) | (0.02,0.2)         | (0.03,0.35)        | (0.04,0.6)         | <b>(0.05,0.8)</b>  |              |
|          | %          | 1.7         | 8.1                | 3.5                | 3.6                | 83.1               | 100          |
|          | N          | 7.5         | 8.42               | 8.18               | 7.69               | 7.99               | 39.79        |
|          | $(D, R)$   | (0.08,0.37) | (0.16,1.75)        | (0.23,2.78)        | (0.29,4.53)        | (0.42,6.41)        | (1.18,15.83) |
| 2        | $(p, q)$   | (0.01,0.57) | (0.03,0.58)        | (0.06,0.6)         | <b>(0.2,0.62)</b>  | (0.32,0.64)        |              |
|          | %          | 18.6        | 21.2               | 24.4               | 22.9               | 12.9               | 100          |
|          | N          | 7.53        | 8.15               | 7.35               | 6.35               | 3.56               | 32.94        |
|          | $(D, R)$   | (0.08,4.23) | (0.23,4.77)        | (0.47,4.34)        | (1.31,3.91)        | (1.16,2.27)        | (3.25,19.53) |
| 3        | $(p, q)$   | (0.02,0.2)  | (0.03,0.4)         | (0.04,0.6)         | (0.06,0.68)        | <b>(0.2,0.74)</b>  |              |
|          | %          | 3.9         | 6.3                | 13.4               | 24.1               | 52.3               | 100          |
|          | N          | 7.86        | 8.28               | 8.27               | 8.25               | 8.41               | 41.08        |
|          | $(D, R)$   | (0.15,1.52) | (0.24,3.25)        | (0.33,4.97)        | (0.49,5.63)        | (1.73,6.26)        | (2.94,21.63) |
| 4        | $(p, q)$   | (0.01,0.52) | (0.01,0.62)        | (0.02,0.71)        | (0.03,0.79)        | <b>(0.03,0.86)</b> |              |
|          | %          | 13.1        | 11.5               | 8.6                | 7.7                | 59.1               | 100          |
|          | N          | 7.57        | 7.66               | 6.9                | 6.09               | 5.42               | 33.64        |
|          | $(D, R)$   | (0.09,4.01) | (0.11,4.78)        | (0.16,4.87)        | (0.16,4.84)        | (0.15,4.66)        | (0.66,23.17) |
| 5        | $(p, q)$   | (0.18,0.05) | (0.22,0.2)         | <b>(0.26,0.35)</b> | (0.3,0.47)         | (0.33,0.58)        |              |
|          | %          | 18.7        | 25.8               | 20.6               | 12.5               | 11.8               | 89.4         |
|          | N          | 11.58       | 10.64              | 7.92               | 4.78               | 2.58               | 37.5         |
|          | $(D, R)$   | (2.1,0.57)  | (2.37,2.13)        | (2.03,2.7)         | (1.43,2.21)        | (0.82,1.48)        | (8.76,9.08)  |
| 6        | $(p, q)$   | (0.08,0.15) | (0.18,0.38)        | <b>(0.25,0.52)</b> | (0.3,0.59)         | (0.35,0.62)        |              |
|          | %          | 13.1        | 28.2               | 27.8               | 19.4               | 9.2                | 97.7         |
|          | N          | 9.93        | 11.4               | 9.45               | 5.93               | 2.85               | 39.56        |
|          | $(D, R)$   | (0.86,1.56) | (2.03,4.28)        | (2.3,4.89)         | (1.72,3.5)         | (1.01,1.78)        | (7.92,16.02) |
| 7        | $(p, q)$   | (0.01,0.05) | <b>(0.02,0.25)</b> | <b>(0.03,0.25)</b> | <b>(0.04,0.25)</b> | <b>(0.05,0.25)</b> |              |
|          | %          | 1.1         | 17.5               | 20.3               | 15.8               | 45.3               | 100          |
|          | N          | 7.43        | 8.21               | 8.35               | 7.04               | 5.45               | 36.48        |
|          | $(D, R)$   | (0.07,0.37) | (0.15,2.04)        | (0.26,2.06)        | (0.26,1.75)        | (0.26,1.37)        | (1,7.59)     |
| 8        | $(p, q)$   | (0.01,0.05) | (0.02,0.25)        | <b>(0.03,0.4)</b>  | <b>(0.04,0.4)</b>  | <b>(0.05,0.4)</b>  |              |
|          | %          | 1.2         | 7.2                | 21.4               | 19.4               | 50.8               | 100          |
|          | N          | 7.46        | 8.35               | 8.15               | 7.78               | 6.14               | 37.88        |
|          | $(D, R)$   | (0.07,0.37) | (0.16,2.06)        | (0.23,3.22)        | (0.33,3.07)        | (0.31,2.46)        | (1.11,11.18) |
| 9        | $(p, q)$   | (0.01,0.05) | (0.02,0.25)        | (0.03,0.4)         | <b>(0.04,0.6)</b>  | <b>(0.05,0.6)</b>  |              |
|          | %          | 1.2         | 7.4                | 5.7                | 19.2               | 66.5               | 100          |
|          | N          | 7.41        | 8.04               | 8.2                | 7.92               | 7.54               | 39.12        |
|          | $(D, R)$   | (0.06,0.38) | (0.14,2.04)        | (0.24,3.27)        | (0.32,4.71)        | (0.38,4.5)         | (1.14,14.91) |
| 10       | $(p, q)$   | (0.01,0.05) | <b>(0.02,0.25)</b> | (0.03,0.05)        | (0.04,0.05)        | (0.05,0.05)        |              |
|          | %          | 0.8         | 67                 | 10.1               | 4.1                | 18                 | 100          |
|          | N          | 7.42        | 8.44               | 9.19               | 3.75               | 2.46               | 31.25        |
|          | $(D, R)$   | (0.06,0.4)  | (0.18,2.14)        | (0.27,0.42)        | (0.14,0.17)        | (0.12,0.12)        | (0.77,3.26)  |
| 11       | $(p, q)$   | (0.01,0.05) | (0.02,0.2)         | <b>(0.03,0.4)</b>  | (0.04,0.15)        | (0.05,0.15)        |              |
|          | %          | 2.1         | 3.5                | 59.8               | 12                 | 22.6               | 100          |
|          | N          | 7.43        | 8.55               | 8.09               | 7.61               | 3.21               | 34.89        |
|          | $(D, R)$   | (0.07,0.38) | (0.2,1.68)         | (0.22,3.24)        | (0.31,1.2)         | (0.15,0.46)        | (0.94,6.96)  |
| 12       | $(p, q)$   | (0.01,0.05) | (0.02,0.2)         | (0.03,0.3)         | <b>(0.04,0.6)</b>  | (0.05,0.3)         |              |
|          | %          | 1.8         | 10.1               | 2                  | 60.4               | 25.7               | 100          |
|          | N          | 7.47        | 8.46               | 8.27               | 7.73               | 6.74               | 38.68        |
|          | $(D, R)$   | (0.08,0.36) | (0.17,1.73)        | (0.24,2.45)        | (0.32,4.66)        | (0.33,2.04)        | (1.14,11.24) |
| 13       | $(p, q)$   | (0.01,0.05) | (0.02,0.05)        | <b>(0.03,0.3)</b>  | (0.04,0.05)        | (0.05,0.05)        |              |
|          | %          | 13.1        | 0.6                | 64.6               | 8.2                | 13.5               | 100          |
|          | N          | 7.41        | 9.64               | 7.48               | 7.63               | 2.49               | 34.66        |
|          | $(D, R)$   | (0.07,0.34) | (0.22,0.49)        | (0.22,2.19)        | (0.35,0.38)        | (0.13,0.12)        | (0.98,3.53)  |
| 14       | $(p, q)$   | (0.01,0.05) | (0.02,0.05)        | (0.03,0.05)        | <b>(0.04,0.3)</b>  | (0.05,0.05)        |              |
|          | %          | 16          | 15.2               | 0.6                | 51.8               | 16.4               | 100          |
|          | N          | 7.55        | 9.8                | 8.62               | 6.05               | 6.03               | 38.05        |
|          | $(D, R)$   | (0.09,0.39) | (0.2,0.49)         | (0.26,0.4)         | (0.22,1.81)        | (0.3,0.31)         | (1.08,3.39)  |
| 15       | $(p, q)$   | (0.01,0.05) | (0.02,0.05)        | (0.03,0.05)        | (0.04,0.05)        | <b>(0.05,0.3)</b>  |              |
|          | %          | 15.7        | 14.3               | 13.3               | 0.8                | 55.9               | 100          |
|          | N          | 7.43        | 9.71               | 8.76               | 7.52               | 5.2                | 38.62        |
|          | $(D, R)$   | (0.07,0.39) | (0.21,0.48)        | (0.27,0.46)        | (0.28,0.37)        | (0.26,1.59)        | (1.09,3.3)   |

Table 25: Simulation results using the non-parametric model. Cohort size 7 and maximum size 14 for each dose level.  $r^{(l)} = 10$ .  $\mathcal{C}_3 = 0.55$

| Scenario | Dose Level |             |                    |                    |                    | Total              |               |
|----------|------------|-------------|--------------------|--------------------|--------------------|--------------------|---------------|
|          | 1          | 2           | 3                  | 4                  | 5                  |                    |               |
| 1        | $(p, q)$   | (0.01,0.05) | (0.02,0.2)         | (0.03,0.35)        | (0.04,0.6)         | <b>(0.05,0.8)</b>  | 100           |
|          | %          | 5.5         | 7.1                | 3.5                | 4                  | 79.9               | 100           |
|          | N          | 7.55        | 7.99               | 7.78               | 7.6                | 7.65               | 38.56         |
|          | (D,R)      | (0.08,0.34) | (0.17,1.61)        | (0.23,2.75)        | (0.31,4.53)        | (0.4,6.13)         | (1.2,15.37)   |
| 2        | $(p, q)$   | (0.01,0.57) | (0.03,0.58)        | (0.06,0.6)         | <b>(0.2,0.62)</b>  | (0.32,0.64)        | 100           |
|          | %          | 22.7        | 17.7               | 22.3               | 22.4               | 14.9               | 100           |
|          | N          | 7.5         | 8.02               | 6.92               | 6.68               | 4.05               | 33.17         |
|          | (D,R)      | (0.08,4.28) | (0.22,4.62)        | (0.41,4.25)        | (1.34,4.08)        | (1.35,2.62)        | (3.4,19.86)   |
| 3        | $(p, q)$   | (0.02,0.2)  | (0.03,0.4)         | (0.04,0.6)         | (0.06,0.68)        | <b>(0.2,0.74)</b>  | 100           |
|          | %          | 6.1         | 6.9                | 14.8               | 19                 | 53.2               | 100           |
|          | N          | 7.99        | 8.3                | 8.2                | 7.94               | 8.34               | 40.78         |
|          | (D,R)      | (0.18,1.62) | (0.25,3.31)        | (0.34,4.91)        | (0.48,5.41)        | (1.68,6.22)        | (2.93,21.47)  |
| 4        | $(p, q)$   | (0.01,0.52) | (0.01,0.62)        | (0.02,0.71)        | (0.03,0.79)        | <b>(0.03,0.86)</b> | 100           |
|          | %          | 10.2        | 11.2               | 10.8               | 10.8               | 57                 | 100           |
|          | N          | 7.5         | 7.71               | 7.07               | 6.28               | 5.57               | 34.12         |
|          | (D,R)      | (0.08,3.77) | (0.13,4.79)        | (0.14,5.02)        | (0.16,4.91)        | (0.18,4.76)        | (0.7,23.25)   |
| 5        | $(p, q)$   | (0.18,0.05) | (0.22,0.2)         | <b>(0.26,0.35)</b> | (0.3,0.47)         | (0.33,0.58)        | 95.6          |
|          | %          | 12.3        | 19.6               | 21.7               | 18.2               | 23.8               | 95.6          |
|          | N          | 12.26       | 11.77              | 10.33              | 7.74               | 4.99               | 47.1          |
|          | (D,R)      | (2.25,0.64) | (2.63,2.31)        | (2.7,3.62)         | (2.39,3.7)         | (1.68,2.96)        | (11.65,13.23) |
| 6        | $(p, q)$   | (0.08,0.15) | (0.18,0.38)        | <b>(0.25,0.52)</b> | (0.3,0.59)         | (0.35,0.62)        | 99.8          |
|          | %          | 5.8         | 21                 | 29.7               | 22.9               | 20.4               | 99.8          |
|          | N          | 10.12       | 11.86              | 11.42              | 8.53               | 5.01               | 46.95         |
|          | (D,R)      | (0.8,1.51)  | (2.05,4.47)        | (2.87,6.04)        | (2.54,4.96)        | (1.78,3.15)        | (10.05,20.13) |
| 7        | $(p, q)$   | (0.01,0.05) | <b>(0.02,0.25)</b> | <b>(0.03,0.25)</b> | <b>(0.04,0.25)</b> | <b>(0.05,0.25)</b> | 100           |
|          | %          | 3.1         | 22                 | 19.8               | 16.8               | 38.3               | 100           |
|          | N          | 7.5         | 7.98               | 7.88               | 6.37               | 4.71               | 34.43         |
|          | (D,R)      | (0.08,0.39) | (0.16,2.03)        | (0.23,1.99)        | (0.27,1.58)        | (0.22,1.15)        | (0.96,7.15)   |
| 8        | $(p, q)$   | (0.01,0.05) | (0.02,0.25)        | <b>(0.03,0.4)</b>  | <b>(0.04,0.4)</b>  | <b>(0.05,0.4)</b>  | 100           |
|          | %          | 3.8         | 7.5                | 20.9               | 20.6               | 47.2               | 100           |
|          | N          | 7.41        | 7.97               | 8                  | 7.62               | 5.82               | 36.81         |
|          | (D,R)      | (0.06,0.33) | (0.18,1.98)        | (0.26,3.18)        | (0.32,3.07)        | (0.31,2.32)        | (1.12,10.89)  |
| 9        | $(p, q)$   | (0.01,0.05) | (0.02,0.25)        | (0.03,0.4)         | <b>(0.04,0.6)</b>  | <b>(0.05,0.6)</b>  | 100           |
|          | %          | 3.8         | 7.7                | 4.8                | 21.7               | 62                 | 100           |
|          | N          | 7.54        | 7.87               | 8.11               | 7.6                | 7.29               | 38.41         |
|          | (D,R)      | (0.09,0.37) | (0.15,1.96)        | (0.27,3.24)        | (0.29,4.57)        | (0.38,4.34)        | (1.18,14.47)  |
| 10       | $(p, q)$   | (0.01,0.05) | <b>(0.02,0.25)</b> | (0.03,0.05)        | (0.04,0.05)        | (0.05,0.05)        | 100           |
|          | %          | 3.7         | 70.6               | 12.8               | 4                  | 8.9                | 100           |
|          | N          | 7.42        | 8.06               | 7.25               | 2.13               | 1.11               | 25.98         |
|          | (D,R)      | (0.07,0.34) | (0.18,2.05)        | (0.21,0.34)        | (0.1,0.11)         | (0.07,0.06)        | (0.62,2.9)    |
| 11       | $(p, q)$   | (0.01,0.05) | (0.02,0.2)         | <b>(0.03,0.4)</b>  | (0.04,0.15)        | (0.05,0.15)        | 100           |
|          | %          | 6           | 4.4                | 62                 | 12                 | 15.6               | 100           |
|          | N          | 7.52        | 7.95               | 7.85               | 6.94               | 2.48               | 32.74         |
|          | (D,R)      | (0.09,0.38) | (0.17,1.61)        | (0.24,3.13)        | (0.25,1.01)        | (0.14,0.37)        | (0.88,6.5)    |
| 12       | $(p, q)$   | (0.01,0.05) | (0.02,0.2)         | (0.03,0.3)         | <b>(0.04,0.6)</b>  | (0.05,0.3)         | 100           |
|          | %          | 6.7         | 11.7               | 2                  | 57.3               | 22.3               | 100           |
|          | N          | 7.64        | 8.02               | 7.73               | 7.19               | 6.29               | 36.86         |
|          | (D,R)      | (0.1,0.39)  | (0.18,1.55)        | (0.22,2.32)        | (0.3,4.32)         | (0.32,1.94)        | (1.11,10.51)  |
| 13       | $(p, q)$   | (0.01,0.05) | (0.02,0.05)        | <b>(0.03,0.3)</b>  | (0.04,0.05)        | (0.05,0.05)        | 100           |
|          | %          | 20.5        | 1.7                | 60.6               | 7.9                | 9.3                | 100           |
|          | N          | 7.41        | 7.82               | 6.52               | 5.96               | 1.39               | 29.1          |
|          | (D,R)      | (0.06,0.34) | (0.16,0.37)        | (0.19,1.95)        | (0.24,0.29)        | (0.06,0.07)        | (0.72,3.03)   |
| 14       | $(p, q)$   | (0.01,0.05) | (0.02,0.05)        | (0.03,0.05)        | <b>(0.04,0.3)</b>  | (0.05,0.05)        | 100           |
|          | %          | 20.3        | 18.2               | 2                  | 47.5               | 12                 | 100           |
|          | N          | 7.46        | 7.8                | 6.57               | 5.35               | 4.55               | 31.74         |
|          | (D,R)      | (0.07,0.37) | (0.16,0.41)        | (0.22,0.35)        | (0.21,1.61)        | (0.2,0.23)         | (0.86,2.97)   |
| 15       | $(p, q)$   | (0.01,0.05) | (0.02,0.05)        | (0.03,0.05)        | (0.04,0.05)        | <b>(0.05,0.3)</b>  | 100           |
|          | %          | 20.2        | 18.9               | 13.9               | 0.8                | 46.2               | 100           |
|          | N          | 7.45        | 7.76               | 6.63               | 5.2                | 4.42               | 31.45         |
|          | (D,R)      | (0.08,0.39) | (0.15,0.39)        | (0.22,0.34)        | (0.22,0.27)        | (0.24,1.33)        | (0.9,2.72)    |

Table 26: Simulation results using the non-parametric+ model. Cohort size 7 and maximum size 14 for each dose level.  $r^{(l)} = 10$ .  $\mathcal{C}_3 = 0.55$

| Scenario | Dose Level |             |                    |                    |                    | Total              |               |
|----------|------------|-------------|--------------------|--------------------|--------------------|--------------------|---------------|
|          | 1          | 2           | 3                  | 4                  | 5                  |                    |               |
| 1        | $(p, q)$   | (0.01,0.05) | (0.02,0.2)         | (0.03,0.35)        | (0.04,0.6)         | <b>(0.05,0.8)</b>  |               |
|          | %          | 7.2         | 8                  | 3                  | 4.1                | 77.7               | 100           |
|          | N          | 7.49        | 7.15               | 6.8                | 6.17               | 6.12               | 33.75         |
|          | (D,R)      | (0.08,0.41) | (0.15,1.46)        | (0.17,2.29)        | (0.24,3.71)        | (0.3,4.92)         | (0.95,12.78)  |
| 2        | $(p, q)$   | (0.01,0.57) | (0.03,0.58)        | (0.06,0.6)         | <b>(0.2,0.62)</b>  | (0.32,0.64)        |               |
|          | %          | 19.6        | 18.3               | 17.9               | 22.1               | 22.1               | 100           |
|          | N          | 7.51        | 7.24               | 6.24               | 6.78               | 4.9                | 32.67         |
|          | (D,R)      | (0.08,4.33) | (0.24,4.26)        | (0.33,3.74)        | (1.4,4.27)         | (1.56,3.12)        | (3.61,19.72)  |
| 3        | $(p, q)$   | (0.02,0.2)  | (0.03,0.4)         | (0.04,0.6)         | (0.06,0.68)        | <b>(0.2,0.74)</b>  |               |
|          | %          | 5.2         | 6.3                | 13                 | 15.1               | 60.4               | 100           |
|          | N          | 8.06        | 7.43               | 7.16               | 6.94               | 8.8                | 38.39         |
|          | (D,R)      | (0.18,1.6)  | (0.23,2.98)        | (0.26,4.32)        | (0.44,4.73)        | (1.75,6.48)        | (2.86,20.11)  |
| 4        | $(p, q)$   | (0.01,0.52) | (0.01,0.62)        | (0.02,0.71)        | (0.03,0.79)        | <b>(0.03,0.86)</b> |               |
|          | %          | 11.8        | 12.2               | 12.6               | 9.7                | 53.7               | 100           |
|          | N          | 7.46        | 7.1                | 6.31               | 5.39               | 4.51               | 30.78         |
|          | (D,R)      | (0.07,3.85) | (0.13,4.41)        | (0.13,4.47)        | (0.12,4.2)         | (0.13,3.93)        | (0.58,20.86)  |
| 5        | $(p, q)$   | (0.18,0.05) | (0.22,0.2)         | <b>(0.26,0.35)</b> | (0.3,0.47)         | (0.33,0.58)        |               |
|          | %          | 6.8         | 11.2               | 19.6               | 20.6               | 38.2               | 96.4          |
|          | N          | 12.07       | 12.11              | 11.74              | 9.89               | 7.13               | 52.94         |
|          | (D,R)      | (2.16,0.6)  | (2.57,2.39)        | (3.12,4.15)        | (2.93,4.64)        | (2.33,4.11)        | (13.11,15.89) |
| 6        | $(p, q)$   | (0.08,0.15) | (0.18,0.38)        | <b>(0.25,0.52)</b> | (0.3,0.59)         | (0.35,0.62)        |               |
|          | %          | 3.3         | 14.4               | 27.1               | 30.9               | 24.1               | 99.8          |
|          | N          | 10.07       | 11.56              | 12.22              | 10.09              | 5.98               | 49.91         |
|          | (D,R)      | (0.82,1.52) | (2.07,4.39)        | (3.09,6.39)        | (2.95,5.9)         | (2.04,3.71)        | (10.98,21.92) |
| 7        | $(p, q)$   | (0.01,0.05) | <b>(0.02,0.25)</b> | <b>(0.03,0.25)</b> | <b>(0.04,0.25)</b> | <b>(0.05,0.25)</b> |               |
|          | %          | 3.6         | 21.6               | 18.5               | 16.1               | 40.2               | 100           |
|          | N          | 7.51        | 7.15               | 7.05               | 5.42               | 4.18               | 31.3          |
|          | (D,R)      | (0.08,0.38) | (0.13,1.79)        | (0.2,1.75)         | (0.21,1.38)        | (0.22,1.06)        | (0.85,6.37)   |
| 8        | $(p, q)$   | (0.01,0.05) | (0.02,0.25)        | <b>(0.03,0.4)</b>  | <b>(0.04,0.4)</b>  | <b>(0.05,0.4)</b>  |               |
|          | %          | 3.4         | 9.2                | 21.4               | 17.3               | 48.7               | 100           |
|          | N          | 7.5         | 7.13               | 7.09               | 6.27               | 4.86               | 32.84         |
|          | (D,R)      | (0.07,0.36) | (0.14,1.81)        | (0.2,2.84)         | (0.23,2.48)        | (0.21,1.92)        | (0.86,9.41)   |
| 9        | $(p, q)$   | (0.01,0.05) | (0.02,0.25)        | (0.03,0.4)         | <b>(0.04,0.6)</b>  | <b>(0.05,0.6)</b>  |               |
|          | %          | 4.2         | 8.2                | 5                  | 17.6               | 65                 | 100           |
|          | N          | 7.48        | 7.16               | 7.03               | 6.38               | 6.14               | 34.19         |
|          | (D,R)      | (0.08,0.41) | (0.15,1.76)        | (0.19,2.69)        | (0.26,3.82)        | (0.32,3.67)        | (1,12.35)     |
| 10       | $(p, q)$   | (0.01,0.05) | <b>(0.02,0.25)</b> | (0.03,0.05)        | (0.04,0.05)        | (0.05,0.05)        |               |
|          | %          | 2.4         | 67.9               | 11.9               | 6.4                | 11.4               | 100           |
|          | N          | 7.57        | 7.2                | 6.96               | 2.19               | 1.34               | 25.27         |
|          | (D,R)      | (0.09,0.37) | (0.15,1.82)        | (0.22,0.32)        | (0.08,0.12)        | (0.08,0.07)        | (0.62,2.69)   |
| 11       | $(p, q)$   | (0.01,0.05) | (0.02,0.2)         | <b>(0.03,0.4)</b>  | (0.04,0.15)        | (0.05,0.15)        |               |
|          | %          | 6.1         | 4.8                | 54.5               | 12.2               | 22.4               | 100           |
|          | N          | 7.48        | 7.13               | 6.86               | 6.37               | 2.57               | 30.41         |
|          | (D,R)      | (0.08,0.36) | (0.14,1.41)        | (0.19,2.77)        | (0.24,0.99)        | (0.13,0.42)        | (0.78,5.95)   |
| 12       | $(p, q)$   | (0.01,0.05) | (0.02,0.2)         | (0.03,0.3)         | <b>(0.04,0.6)</b>  | (0.05,0.3)         |               |
|          | %          | 6.7         | 10.9               | 2.5                | 52.7               | 27.2               | 100           |
|          | N          | 7.5         | 7.09               | 6.9                | 6.03               | 5.71               | 33.23         |
|          | (D,R)      | (0.08,0.38) | (0.12,1.4)         | (0.22,2.06)        | (0.23,3.62)        | (0.26,1.75)        | (0.92,9.21)   |
| 13       | $(p, q)$   | (0.01,0.05) | (0.02,0.05)        | <b>(0.03,0.3)</b>  | (0.04,0.05)        | (0.05,0.05)        |               |
|          | %          | 18.2        | 1.9                | 60.2               | 10.7               | 9                  | 100           |
|          | N          | 7.38        | 7.14               | 5.96               | 5.68               | 1.44               | 27.59         |
|          | (D,R)      | (0.06,0.37) | (0.15,0.36)        | (0.16,1.75)        | (0.24,0.27)        | (0.07,0.06)        | (0.69,2.82)   |
| 14       | $(p, q)$   | (0.01,0.05) | (0.02,0.05)        | (0.03,0.05)        | <b>(0.04,0.3)</b>  | (0.05,0.05)        |               |
|          | %          | 19.1        | 20.2               | 1.4                | 43.3               | 16                 | 100           |
|          | N          | 7.5         | 7.15               | 5.94               | 4.54               | 4.29               | 29.42         |
|          | (D,R)      | (0.08,0.37) | (0.15,0.37)        | (0.16,0.3)         | (0.19,1.37)        | (0.22,0.25)        | (0.81,2.67)   |
| 15       | $(p, q)$   | (0.01,0.05) | (0.02,0.05)        | (0.03,0.05)        | (0.04,0.05)        | <b>(0.05,0.3)</b>  |               |
|          | %          | 21.2        | 19.3               | 14.2               | 1.5                | 43.8               | 100           |
|          | N          | 7.57        | 7.18               | 5.8                | 4.46               | 3.49               | 28.5          |
|          | (D,R)      | (0.09,0.39) | (0.17,0.36)        | (0.17,0.3)         | (0.18,0.21)        | (0.17,1.05)        | (0.78,2.3)    |

Table 27: Simulation results using the parametric model. Cohort size 7 and maximum size 14 for each dose level.  $r^{(l)} = 10$ .  $\mathcal{C}_3 = 0.55$

| Scenario | Dose Level |             |                    |                    |                    | Total              |               |
|----------|------------|-------------|--------------------|--------------------|--------------------|--------------------|---------------|
|          | 1          | 2           | 3                  | 4                  | 5                  |                    |               |
| 1        | $(p, q)$   | (0.01,0.05) | (0.02,0.2)         | (0.03,0.35)        | (0.04,0.6)         | <b>(0.05,0.8)</b>  |               |
|          | %          | 6.1         | 8.3                | 3.2                | 4.1                | 78.3               | 100           |
|          | N          | 7.49        | 7.13               | 6.92               | 6.26               | 6.18               | 33.98         |
|          | $(D,R)$    | (0.08,0.37) | (0.15,1.45)        | (0.21,2.46)        | (0.25,3.77)        | (0.29,4.96)        | (0.98,13.01)  |
| 2        | $(p, q)$   | (0.01,0.57) | (0.03,0.58)        | (0.06,0.6)         | <b>(0.2,0.62)</b>  | (0.32,0.64)        |               |
|          | %          | 20.6        | 20.1               | 17.8               | 21.8               | 19.7               | 100           |
|          | N          | 7.39        | 7.18               | 6.19               | 6.47               | 4.51               | 31.75         |
|          | $(D,R)$    | (0.06,4.22) | (0.2,4.17)         | (0.39,3.73)        | (1.29,4.03)        | (1.44,2.86)        | (3.39,19.01)  |
| 3        | $(p, q)$   | (0.02,0.2)  | (0.03,0.4)         | (0.04,0.6)         | (0.06,0.68)        | <b>(0.2,0.74)</b>  |               |
|          | %          | 5.6         | 6.3                | 13.6               | 15.5               | 59                 | 100           |
|          | N          | 7.76        | 7.34               | 7.22               | 6.96               | 8.78               | 38.06         |
|          | $(D,R)$    | (0.14,1.58) | (0.2,2.9)          | (0.27,4.39)        | (0.45,4.78)        | (1.78,6.47)        | (2.85,20.11)  |
| 4        | $(p, q)$   | (0.01,0.52) | (0.01,0.62)        | (0.02,0.71)        | (0.03,0.79)        | <b>(0.03,0.86)</b> |               |
|          | %          | 10.5        | 14                 | 12.4               | 13                 | 50.1               | 100           |
|          | N          | 7.53        | 7.14               | 6.43               | 5.32               | 4.49               | 30.91         |
|          | $(D,R)$    | (0.08,3.87) | (0.12,4.45)        | (0.13,4.56)        | (0.12,4.2)         | (0.11,3.85)        | (0.57,20.93)  |
| 5        | $(p, q)$   | (0.18,0.05) | (0.22,0.2)         | <b>(0.26,0.35)</b> | (0.3,0.47)         | (0.33,0.58)        |               |
|          | %          | 7           | 12.7               | 22.2               | 18.2               | 35.8               | 95.9          |
|          | N          | 11.83       | 11.98              | 11.49              | 9.39               | 6.54               | 51.23         |
|          | $(D,R)$    | (2.05,0.55) | (2.71,2.39)        | (3.04,4.13)        | (2.8,4.36)         | (2.13,3.8)         | (12.73,15.22) |
| 6        | $(p, q)$   | (0.08,0.15) | (0.18,0.38)        | <b>(0.25,0.52)</b> | (0.3,0.59)         | (0.35,0.62)        |               |
|          | %          | 4.6         | 16.9               | 25.4               | 29.4               | 23.7               | 100           |
|          | N          | 10.14       | 11.4               | 11.75              | 9.55               | 5.7                | 48.54         |
|          | $(D,R)$    | (0.8,1.49)  | (2.18,4.47)        | (2.9,6.08)         | (2.93,5.71)        | (1.96,3.54)        | (10.76,21.29) |
| 7        | $(p, q)$   | (0.01,0.05) | <b>(0.02,0.25)</b> | <b>(0.03,0.25)</b> | <b>(0.04,0.25)</b> | <b>(0.05,0.25)</b> |               |
|          | %          | 3.6         | 22.2               | 20.7               | 14.4               | 39.1               | 100           |
|          | N          | 7.43        | 7.17               | 6.99               | 5.36               | 4                  | 30.96         |
|          | $(D,R)$    | (0.07,0.4)  | (0.15,1.84)        | (0.21,1.75)        | (0.22,1.35)        | (0.2,1.04)         | (0.85,6.37)   |
| 8        | $(p, q)$   | (0.01,0.05) | (0.02,0.25)        | <b>(0.03,0.4)</b>  | <b>(0.04,0.4)</b>  | <b>(0.05,0.4)</b>  |               |
|          | %          | 4.2         | 8.3                | 21.9               | 17.1               | 48.5               | 100           |
|          | N          | 7.46        | 7.13               | 7.07               | 6.26               | 4.84               | 32.76         |
|          | $(D,R)$    | (0.07,0.38) | (0.14,1.79)        | (0.23,2.81)        | (0.24,2.44)        | (0.23,1.93)        | (0.91,9.35)   |
| 9        | $(p, q)$   | (0.01,0.05) | (0.02,0.25)        | (0.03,0.4)         | <b>(0.04,0.6)</b>  | <b>(0.05,0.6)</b>  |               |
|          | %          | 2.9         | 8.2                | 4.9                | 19                 | 65                 | 100           |
|          | N          | 7.52        | 7.13               | 7.12               | 6.45               | 6.24               | 34.47         |
|          | $(D,R)$    | (0.08,0.4)  | (0.15,1.82)        | (0.2,2.86)         | (0.25,3.88)        | (0.31,3.79)        | (0.99,12.75)  |
| 10       | $(p, q)$   | (0.01,0.05) | <b>(0.02,0.25)</b> | (0.03,0.05)        | (0.04,0.05)        | (0.05,0.05)        |               |
|          | %          | 4.4         | 65                 | 15.4               | 7.1                | 8.1                | 100           |
|          | N          | 7.5         | 7.17               | 6.91               | 2.16               | 1.11               | 24.84         |
|          | $(D,R)$    | (0.08,0.37) | (0.16,1.8)         | (0.24,0.38)        | (0.08,0.12)        | (0.05,0.05)        | (0.61,2.72)   |
| 11       | $(p, q)$   | (0.01,0.05) | (0.02,0.2)         | <b>(0.03,0.4)</b>  | (0.04,0.15)        | (0.05,0.15)        |               |
|          | %          | 5.8         | 4.4                | 57.6               | 12.9               | 19.3               | 100           |
|          | N          | 7.45        | 7.17               | 6.93               | 6.42               | 2.37               | 30.34         |
|          | $(D,R)$    | (0.08,0.36) | (0.15,1.43)        | (0.2,2.81)         | (0.25,0.93)        | (0.11,0.35)        | (0.79,5.88)   |
| 12       | $(p, q)$   | (0.01,0.05) | (0.02,0.2)         | (0.03,0.3)         | <b>(0.04,0.6)</b>  | (0.05,0.3)         |               |
|          | %          | 5.5         | 13.9               | 1.8                | 52.9               | 25.9               | 100           |
|          | N          | 7.5         | 7.2                | 6.94               | 5.9                | 5.69               | 33.23         |
|          | $(D,R)$    | (0.08,0.36) | (0.14,1.42)        | (0.21,2.01)        | (0.24,3.55)        | (0.28,1.73)        | (0.94,9.07)   |
| 13       | $(p, q)$   | (0.01,0.05) | (0.02,0.05)        | <b>(0.03,0.3)</b>  | (0.04,0.05)        | (0.05,0.05)        |               |
|          | %          | 17          | 3                  | 59.8               | 11.7               | 8.5                | 100           |
|          | N          | 7.45        | 7.11               | 6.06               | 5.63               | 1.46               | 27.71         |
|          | $(D,R)$    | (0.07,0.33) | (0.13,0.36)        | (0.16,1.76)        | (0.21,0.27)        | (0.06,0.08)        | (0.64,2.8)    |
| 14       | $(p, q)$   | (0.01,0.05) | (0.02,0.05)        | (0.03,0.05)        | <b>(0.04,0.3)</b>  | (0.05,0.05)        |               |
|          | %          | 19.9        | 18.6               | 2.5                | 46.4               | 12.6               | 100           |
|          | N          | 7.62        | 7.17               | 5.89               | 4.49               | 4.27               | 29.46         |
|          | $(D,R)$    | (0.1,0.36)  | (0.15,0.33)        | (0.17,0.3)         | (0.16,1.34)        | (0.25,0.2)         | (0.83,2.54)   |
| 15       | $(p, q)$   | (0.01,0.05) | (0.02,0.05)        | (0.03,0.05)        | (0.04,0.05)        | <b>(0.05,0.3)</b>  |               |
|          | %          | 19.2        | 22.5               | 16.7               | 2                  | 39.6               | 100           |
|          | N          | 7.46        | 7.1                | 5.83               | 4.2                | 3.13               | 27.71         |
|          | $(D,R)$    | (0.07,0.39) | (0.14,0.38)        | (0.17,0.3)         | (0.18,0.19)        | (0.13,0.88)        | (0.68,2.15)   |

Table 28: Simulation results using the parametric+ model. Cohort size 7 and maximum size 14 for each dose level.  $r^{(l)} = 10$ .  $\mathcal{C}_3 = 0.55$

## 4 Simulation settings for comparing to existing methods

In this section, we describe the simulation settings for the *EffTox* design and the *UAROET* design. For the statistical details of the two designs, we refer users to Thall and Cook [2004] for the *EffTox* design and Thall and Nguyen [2012] for the *UAROET* design. The software *EffTox* V5.0.0 and *UAROET* V1.8 were downloaded from Biostat MDAnderson.

### 4.1 EffTox Design

1. The dose values are set to be 1, 2, 4, 8, 16
2. Max sample size is set to be 42
3. Number of Sim Repetitions is set to be 1000
4. Random seed is set to 10502
5. The probability of toxicity and efficacy limits for dose acceptability rules are as follows:
  - Probability of toxicity upper limit 0.3 with lower probability threshold 0.7
  - Probability of efficacy lower limit 0.1 with lower probability threshold 0.1
6. The trade-off function elicited points,  $(\pi_E, \pi_T)$ , are chosen to be (0.5, 0), (1, 0.65), and (0.7, 0.25)
7. The standard deviations of the hyper-parameters are set to be 20

### 4.2 UAROET Design

1. Number of toxicity and efficacy levels are set to be 2
2. Max sample size is set to be 42
3. Number of Sim Repetitions is set to be 1000
4. The utility function is set to be
  - not toxic and not efficacious: 50
  - not toxic and efficacious: 100
  - toxic and efficacious: 5
  - toxic and not efficacious: 0
5. Correlation of toxicity and efficacy is set to 0
6. The standard deviations of the hyper-parameters are set to be 100

## References

Peter F Thall and John D Cook. Dose-finding based on efficacy–toxicity trade-offs. *Biometrics*, 60(3): 684–693, 2004.

Peter F Thall and Hoang Q Nguyen. Adaptive randomization to improve utility-based dose-finding with bivariate ordinal outcomes. *Journal of biopharmaceutical statistics*, 22(4):785–801, 2012.
